# Supplementary material for: Cross‐species complementation reveals conserved functions for EARLY FLOWERING 3 between monocots and dicots
Source: PubMed Central journal article supplement (PMC6508535; doi:10.1002/pld3.18), 2017-10-16
Supplement: PLD3-1-e00018-s001.pdf [file PLD3-1-e00018-s001.pdf]

**Supplemental Figure S1.** Multiple sequence alignments of ELF3 orthologs (A) and percentage of identical amino acid sequences (B). Protein sequences of AtELF3 (AT2G25930.1), BdELF3 (Bradi2g14290.1), SvELF3a (Sevir.5G206400.1) and SvELF3b (Sevir.3G123200.1) were used for multiple sequence alignments and for generating percentage of identical amino acids by Clustal Omega alignment with default parameters.

**Supplemental Figure S2.** Diel and circadian expression of *BdELF3* from the DIURNAL database. GCRMA (GeneChip Robust Multiarray Averaging) values from the DIURNAL database (Mockler et al., 2007) were plotted to show time-course expression profiles of *Bradi2g14290* (*BdELF3*) under either diel (A) or circadian conditions (B). Diel expression of *AtELF3* from DIURNAL database was used for comparison in (A). Shade boxes indicate dark periods. In (B), Circadian expression data was obtained by entraining plants with either photo- (LDHH) or thermo- (LLHC) conditions followed by sampling under the Free-Running condition (F) with constant light and temperature.

**Supplemental Figure S3.** Example of the Diel Explorer interface. The search interface (left) and plotting interface of Diel Explorer are shown (right). Users can search by gene or ortholog id, or by gene ontology term. Alternately, users can filter data by period, phase (lag) or significance cut offs. Data can be plotted in a line graph or heatmap.

**Supplemental Figure S4.** Summary of circadian regulated genes in *S. viridis*. Distribution of circadian regulated genes in *S. viridis* was plotted by their phases, with the y axis showing the number of genes considered significantly (Bonferroni Adjusted P-Value < 0.001) cycling under photo- (LDHH) or thermo- (LLHC) entrainment in *S. viridis* followed by free-running condition (F).

**Supplemental Figure S5.** Circadian expression of selected *A. thaliana* clock genes from the DIURNAL database. GCRMA (GeneChip Robust Multiarray Averaging) values were plotted to show time-course expression profiles of selected *A. thaliana* clock genes under

either photo- (LL23\_LDHH) or thermo-entrainment (LL\_LLHC) from the DIURNAL database (Mockler et al., 2007). Each gene cycles with a correlation of  $> 0.9$  when compared to a best fit model (24-hour rhythm).

**Supplemental Figure S6.** Anti-FLAG western of ELF3 transgenic lines used for complementation analysis. Representative blot of protein extracts from day 12 seedlings taken at Zeitgeber time 12 grown under 12-hour light :12-hour dark growth conditions at 22 °C that were probed with FLAG antibody to detect the 3xFLAG epitope. RPT5 is used as a loading control.

**Supplemental Figure S7.** Relative Amplitude Error vs period plots. The periods and relative amplitude error (RAE) of 8 AtELF3 *elf3-2* (A), BdELF3 *elf3-2* (B), and SvELF3 *elf3-2* (C) seedlings were plotted along with wild type and *elf3-2* mutants (Note, only 3 of 8 *elf3* seedlings has measurable rhythms). RAE=0.5 was used as a cutoff (dotted line), above which a seedling is not considered rhythmic (Plautz et al., 1997). Note that wild type and *elf3* mutant data were reproduced on all plots for comparison purposes.

# Supplemental Figure 1

A

ABELEF3 1 **W**R-----**G**K**E** **K**I**L**E**F** **F**E**R**L**H**V**N**D**A**D**K** **G**G**P**R**A**P**R**I**N**K**M**A**L**Y**E**O**L**S **F**S**O**R**G**D  
 BDELF3 1 **M**R**R**-**G**G**G**P**A****G**R**E**D**K**V**G**P**L**F**P**R**L**H**V**N**D**I**L**K **G**G**P**R**A**P**R**I**N**K**M**A**L**Y**E**O**F**S**V**S**O**R**E****H**P  
 SVELLF3a 1 **W**R**G****G**A**G****G**R**E****L**O**G**K**V**G**P**L**F**P**R**L**H**V**S** **G**A**K**G**G**G**P**R**A**P**R**I**N**K**A**L**Y**E**O**F **V**S**S** **R**E**F**S  
 SVELLF3b 1 **M**R**R**-**G**A**G**K---**D**E**A**D**K**V**G**V**G**P**L**F**P**R**L**H**V**N**D**I**V**K **G**G**P**R**A**P**R**I**N**K**M**A**L**Y**E**O**F**S**V**S**H**R**E**F**S**A  
 ABELEF3 52 **H** **T**M**N**S**R**S**N**N**T**-----**S**I**L**H**H**P**G**P**S****S**O**P**C**G**V**R**I**N**L**S**V-----**Q**H  
 BDELF3 51 **H**R**A**S-----**S**S**A**L**S****S**A**S**P**C**O**I**G**S**D**R**P**L**E**P**S**F**C**V**E**S**N**E**A**R**S**S**H  
 SVELLF3a 61 **S**A**S****S**T**R**A-----**A**G**S**L**V** **S**T**S**A**S**O**I**X**S**S**R**P**L**E**H**O**H**D**V**S**N**G**P**H**S**S**E**K  
 SVELLF3b 56 **A**A**A**A**P**A**P**A**P**A**P**A**P**M**H**A**H**R**P**G**A****S**A**V****P**S**T**S**A**S**A**G**G**S**D**R**P**L**E**F**S**F**V**S**T**E**P**V**R**S**S** **H**  
 ABELEF3 86 **I**D**S**S**A**N**O**-----**A**L**T**-----**E**R**K**V**S****O**-----**S**E**M**E**N**V**R**S**S**A**O**H**D**O**R**K**M**A**R**E**H**E  
 BDELF3 99 **I**N**T**S**N**G**R**D**E**N**A**T**R**E**S**G**R**S**T**O**L**K**S**K**D**V**A**A**G**S**T**A**E**C**S**S**O**R**E**-**N**S**V**K**N**S**G**K**K**I **I**N**D**D  
 SVELLF3a 106 **F**K**G**N**S**I**N**G**O**S**I**T**R**E**S**R**G**R**E**I**O**T**K**N**N**D**V**A**S**K**S**L**E**S**H**S**O**H**R**V**G**I**N**K**S**S**G**K**K**I**A**N**D**  
 SVELLF3b 116 **N**A**N**S**N**G**R**A**G**N**A**T**R**E**S**G**R** **S**T**L**K**S**K**D**I**N**A**G**E**F**T**A**E**C**S**S**R**H**E**N** **I**T**K**N**S**S**G**K**K**I **I**N**D**D  
 ABELEF3 125 **D**F**A**V**P****V****I**L**N**S**R**S**O**S**H**G**R**T**S**G**L**E**K**E**R**K**H**T**E**M**A**F**S**H**S** **R**F**O**E**V**N**O**T**G**S**R**O**N**V**O**L**A**I**C**S  
 BDELF3 158 **D**F**T**V**P**S**V**F**C**S**M****P**E**S**T**O**E**V**V**R**I**O** **E**K**S**T**A**E**P**S**T**S**H**Y**K**S**G**E-----**I**M**S**K**S**A**K**C**S**  
 SVELLF3a 166 **E**M**V**P**S**L**C**S**P**P**R**S**R**S**T**O**E**A**G****O** **K**S**N**L**S**A**L**T**N**H**K**S**P**S-----**A**M**P**K**S**S**A**E**C****O**  
 SVELLF3b 175 **D**F**T**V**P**S**V****I**S**G****L****P**H**S**T**O**E-----**K**F**T**P**P**P**T**K**S**P**K**S**H**E-----**A**M**S**K**S**A**K**C**S**  
 ABELEF3 185 **K**P**V****R****D**O**V**K**A**---**N**R**S**---**G**F**V**I**S**L**D****V**S**V**E**T**D**I**E-----**K**S**A**S  
 BDELF3 208 **N**T**D**K**R****I**E**G**T**N**V**S**D**K**R**S**D**S**E**P**I**K**A**P**E**T**M**T**N**L** **V**E**R**S**S**P**O**I**S**K**E**K**A**G**A**D**K****L**S**S**  
 SVELLF3a 216 **S**A**V**N**R****H**L**E**R**I****D**E**S**D**V**S**M**S**S**R**K**I**K**E**K**E**S**V**O**G**K**I**V**E**E****S**L**E**P**O**A**K**E**K**K**N**K**D**A**K**A**C**O  
 SVELLF3b 219 **N**T**D**K**L****H**E**G****K**V**S**P**A**S**M**G**S**P**G**I**K**E**K**E**P**T**K**R**I**D**L**E**E**R**S**S**P**O**I**S**K**E**S**G**L**E**P**K**S**S  
 ABELEF3 221 **S**H**D****R****N**D**N**A**S**L**E****G**S**R**N**R** **Y**R**D**G**G****T**R-----**I**K**D****L****T****N**G**A**E**S**H**I**A**L**T**N**H**S**O**E****G**H**S**P  
 BDELF3 268 **H**R**D**K**L****S**D**L**N**V****D**K**O****H**A**R**T**E****H**O**A**R**R**I**N**E**N**A**E**S**O**A**A**F**K**A**N**G**P**S**S**---**I**N---**E**R**N**G**A**S  
 SVELLF3a 276 **M**G**P**N**A**T**N**I**D**S**I**D**N**E**H**G**S**R**G****P**T**S**N**G**S**S**M**E**A**K**M**E**T**T**T**R**N**T**V**S****G**K**P**C**T**D**I**N---**S**N**K**N**S**  
 SVELLF3b 279 **Y**R**D**K**L**K**R**K**N**V**A**D**K**O**S**E**I**A**S**A**C**I**R**N**R**E**N**A**E**L**O**N**P****E**A**M**A**P**S**A**K**R**Y**A**G---**E**O**N**G**N**S  
 ABELEF3 274 **E**D**I****D****N**D---**R**E**X**S**K**S**R**A**C**A**S**L**O**I**C**I**N**E**A**S**D****E**V**S**D**S****M**A**D**S**I****I**N**S**I**D**S**P**D**V**V**G**I**L****G**O**K**R**F**M**R**  
 BDELF3 322 **N**L**D**E**G**I**R****V****T**E**K**R**A**---**R**S**G**H**H**N**V**-**K**R**D**S**D****L**S**V**E**S****P**G**E** **S**P**D**D**V**V**G**A**I**G**R**K**H**F**M**K  
 SVELLF3a 334 **N**L**D**S**L**R**E**L**S**K**R**K---**R**G**H**-**D**V**E** **O**N**D**I**S**D**S**S**V**E**C****P**G**M**E**S**P**D**E**L**V**G**A**I**G**R**K**H**F**M**K  
 SVELLF3b 336 **D**L**E**L**G****R**E**T**E**K**R**K**---**R**S**H**-**G**V**E** **H**N**D**I**S**D**S**S**V**E**S** **E**V**E** **S**P**D**D**V**V**S**A**I**G**R**K**H**F**M**K  
 ABELEF3 333 **A**R**K**A**N**O**O**R**F**A**V**O**F**E**L**H**R**L**I**K**V**O**K**L**I**A**S**P**D**L**L**I**D**E**I**S**L**G**R**V**S**A**K**S**P**V**K**K**L**I**P**S**E**  
 BDELF3 379 **A**R**A**V**N**O**O**R**F**A**V**O**V**F**E**L**H**R**L**I**K**V**O**K**L**I**A**S**P**H**L**L**I**E**G**P**C**L**G**S**A**L**A**T**S**K---**K**K**L**A**E**G  
 SVELLF3a 390 **A**R**K**A**L****O**N**O**O**R**F**A**V**O**V**F**E**L**H**L**I**K**V**O**K**L**I**A**S**P**H**L**L**I**E**G**P**V**L**G**S**A**L**V****K**R---**K**L**P**K**G**  
 SVELLF3b 392 **A**R**A**V**N**O**O**R**F**A**V**O**V**F**E**L**H**R**L**I**K**V**O**K**L**I**A**S**P**H**L**L**I**E**G**D**E**C**L**D**K**A**L**A**S**K---**K**K**L**A**E**G  
 ABELEF3 449 **D**A**E**K**O**H**O**---**S**A**K**Y**K**D**L****O**O**L** **I**E**H**S**K**D**N**T**E**A**O**P**S**P **I**O**D**D**V****V**A**O****H**N**N**O**A**A**T**A**V**  
 BDELF3 436 **N****L**E**K**O**E**P---**S**A**K**N**K**D**D**A**O**L**L**-**L**O**O** **E**X**S**K**D**L**E**G**N**O**A**S**P****I**O**D**D**V****I**V**O****H**N**N**O**A**S**N**G**D**  
 SVELLF3a 447 **N**L**K****O**L**L**---**S**L**A**N**K**D**L****O****P**A **P**E**O****L**E**L**S**K****N**T**E**G**N****E****P**S**P****R**D**D****G****E****G****N****G**H**D****O**A**L****N**E**T****E**  
 SVELLF3b 449 **D**A**E**K**O**H**O**---**S**A**K**Y**K**D**L****O**O**L** **I**E**H**S**K**D**N**T**E**A**O**P**S**P **I**O**D**D**V****V**A**O****H**N**N**O**A**A**T**A**V**  
 ABELEF3 444 **A**N**N**P**A**S**P**A**P**-----**N**G **G**E**P**R**O**P**P**S**G**N**H****O****W**L **F**V**M**S**P**S**E**G**L** **Y**K**R**H**P****G**M**A**H**T**G---**H**X  
 BDELF3 492 **I**S**N**P**A** **P**A**A****E**D**N**K**S****N****W**O**L**E**F**-----**O**N**O****M**L**V**P**V**M**S**P**S**E**G**L**V****K**K**P****V****G****C**P**P**A**G**S**F**L  
 SVELLF3a 503 **I**S**N**P**P****M**P**A****E**D**N**K**O**N**W**O**L****E****F**-----**O**N**O****M**L**V**P**V**M**S**P**S**E**G**L**V****K**K**P****V****A**G**P**C**P****E****L****G**S**L**  
 SVELLF3b 505 **I**S**N**P**P****M**P**T**P**S**D**N**K**O**N**W**O**L** **E**P**F**-----**P****O****W**L**V**P**V**M**S**P**S**E**G**L**V****K**K**P****V****A**G**H****C**P**P**A**G**S**F**L  
 ABELEF3 497 **G****G****Y**-----**G**H**M**P**T**P**M**V---**P**O**Y**H**P****G**M**G**R-----**P**R**P**G**N**G**X**P**P**R**G**M**P**T**I**N  
 BDELF3 545 **A**P**F****A**S**C**A**P**L**S**L**P**S**T**A**G**D**E**N**S****P****Y**G**L****H**M**P**H**O**P**O**H**W**G**G**P**P** **P**M**P****E****M****P****F****P****F****S****M**P---**V**M  
 SVELLF3a 557 **A**P**F****A**N**C****T**P**L****K**L**P**S-----**I**P**Y**G**L****H**M**P**H**O**P**O**H**M**L**P**G**A**-**P**A**M****H**M**N****Y****F**P**F**S**M**P---**V**M  
 SVELLF3b 559 **A**P**F****F****S****C**A**P** **S**L**P**S**T**A**G**D**E**N**S****P****Y**G**L****H**M**P**H**O**P**O**H**W**G**G**P**P** **P**G**E****H****P**M**P****E****M****P****F****P****F****S****M**P---**V**M

# B

ABELEF3 539 **F**G**S**S**O**O**O****O****O**-----**Q****F****N**E**O****N****O** **G**H**P**G-**N****O****N**T**O**O**O****O****O****S** **N**E**P**A**P**O**O**O**O****O****P**T**S****H**P  
 BDELF3 602 **F**V**S**A**S**A**V**E**O**V**S**R**L**A**P**A**R**P**N**L**H**E**L**H**S**R**N**S**C**N**W**-----**E****N**E**A****S**A**G**I  
 SVELLF3a 607 **E**A**B**A**S**A**V**E**O****G**S**T**A**V**P**O**E**H****G**R**A**E**O**S**L**I**S**C**N**S**H**-----**S**G**I**  
 SVELLF3b 617 **T**H**V**S**A**S**A**V**E**O**V**S**H**A**A**S**H**E**N**G**H** **E**O**H**S**R**S**S**C**N**M**S**N-----**I**R**S**E**A**L**S**A**D**I-----**W**R**F**H  
 ABELEF3 592 **R**A**E**K**S**-**R**O**L**S**T****S**S**E**G**R**O**G**T**S**G---**S**K**S**F**R****P**E**A**A**V**D**E**D**S**N**I**N**N** **P**E**O**T**M**T**T**T**T**T**T**R**T**  
 BDELF3 648 **A**S**D**S**E**L**O****S**S**A**S**S**P**E**R**O****O**G**E****R****E**A**P****E****P**L**S**-----**S**A**G**N  
 SVELLF3a 650 **A**S**D**R**E**P**D****S**S**A**S**S**P**R**I**O**V**O**G**D**S**L**V**S****F**P**S**A-----**P**A**O**N  
 SVELLF3b 666 **A**S**L****D**S**E**L**O****S**S**A**S**S****I**L**D**R**O**O**G**E**R**G**R**G**P**A**O**---**P**E**F**S---**S**V**E**N

ABELEF3 648 **V**T**O****L****P**D**C**G**V**T**E**V**I****K****V**P**H**N**A****K**L**A**S**E****N**A**A**R**L**I**O**S**I**O**E**R**K**R**D**S**K**P  
 BDELF3 600 **P**O**P**S **G**S **E**N**P****G**V**I**R**V****P**H**A**T**A**T**A**S**E**A**R**L**I**F**R**S**I**O**M**E**R**O**N**D**P**---  
 SVELLF3a 691 **P**O**P**S**G**S**R**O**O**N**H**V**I**R**V**P**H**N**O****L**T**A**S**E**A**R**L**I**F**R**S**I**O**M**E**R**O**N**D**P**---  
 SVELLF3b 705 **P**O**P**S**G**S**R**E**M**P **R**V**I**R**V**P**H**T**S****R**A**S**E**S**A**R**L**I**E**S****I****O**M**E**R**O**N**D**---

ATELF3 AT12G25930.1  
 BDELf3 Brad12g14290.1  
 SVELLF3a Sevir.5G206400.1  
 SVELLF3b Sev.ir.3G123200.1

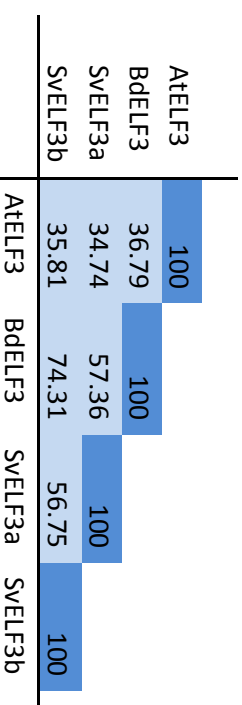

Supplemental Figure 2

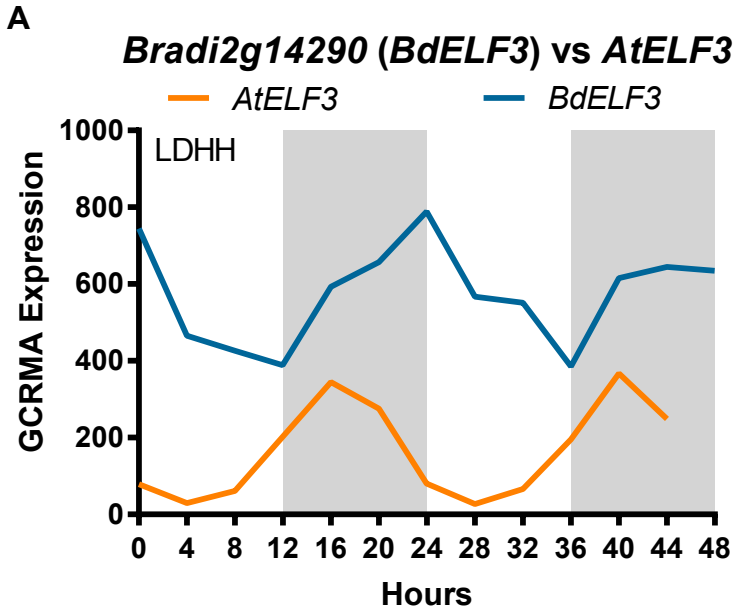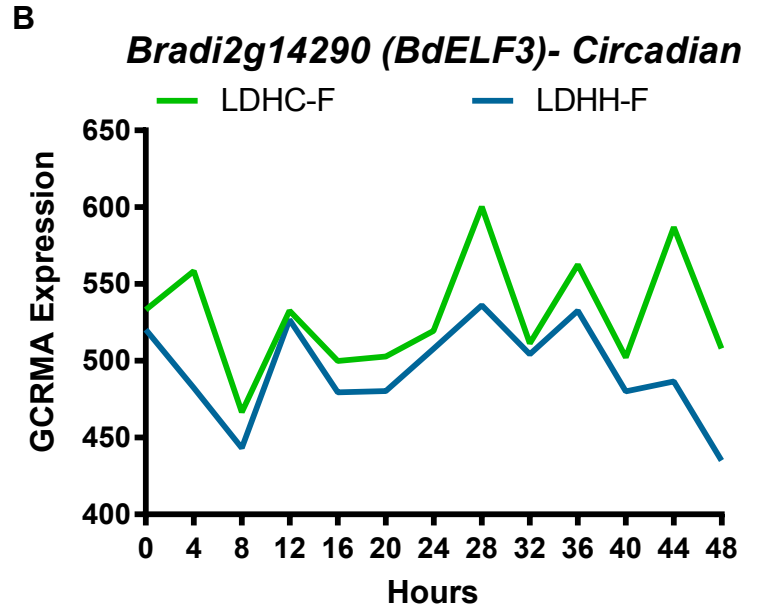

Diel Explorer

Welcome Sample Info Search and Browse Data Plot Data Adding Your Own Data Contact Us

Search Data with GENEID or GO

Search using small sets of GENEIDS

GENEIDS, Orthologs, or GO separated by a comma are allowed  
example: **Sevir:2G310Z00.1,Sevir:1G000100.1**

Search using small sets of GO TERMS

example: **GO:00:0008270**

Search using small sets of ORTHOLOG GENEIDS

example: **AT3G17390.1,LOC\_0501g59080.1**

refresh page to clear search

Search Data with File

Genes, Orthologs, or GO Selected with Search

Browse and Filter Data

Normalize Data

Yes

NO

Species:

All

Entrainment:

ldhlf

Benjamin-Hochberg Q-Value:

1e-06

Adjusted P-Value:

1e-06

Period:

All

Lag (Phase):

2

Download Selected Data

Show 25 entries

| GENEID           | BH Q     | ADLP     | PERIOD | LAG | AMPLITUDE   | dataset | species        | locusName      |
|------------------|----------|----------|--------|-----|-------------|---------|----------------|----------------|
| Sevir:1G324600.1 | 5.52e-09 | 4.37e-11 | 26     | 2   | 195.869285  | ldhlf   | setana.viridis | Sevir:1G324600 |
| Sevir:2G080100.1 | 5.05e-07 | 9.95e-09 | 26     | 2   | 17.908540   | ldhlf   | setana.viridis | Sevir:2G080100 |
| Sevir:2G310Z00.1 | 1.01e-12 | 5.19e-16 | 26     | 2   | 5909.517645 | ldhlf   | setana.viridis | Sevir:2G310Z00 |
| Sevir:3G255600.1 | 6.17e-08 | 8.12e-10 | 26     | 2   | 173.735429  | ldhlf   | setana.viridis | Sevir:3G255600 |
| Sevir:5G333300.1 | 3.07e-08 | 3.54e-10 | 26     | 2   | 3.692540    | ldhlf   | setana.viridis | Sevir:5G333300 |
| Sevir:6G185200.1 | 4.70e-09 | 3.65e-11 | 24     | 2   | 1.399562    | ldhlf   | setana.viridis | Sevir:6G185200 |
| Sevir:9G089300.1 | 2.31e-08 | 2.52e-10 | 26     | 2   | 3.249368    | ldhlf   | setana.viridis | Sevir:9G089300 |
| Sevir:9G175700.1 | 4.18e-10 | 1.73e-12 | 26     | 2   | 1316.979309 | ldhlf   | setana.viridis | Sevir:9G175700 |
| Sevir:9G369500.1 | 1.01e-07 | 2.50e-09 | 28     | 2   | 2.346460    | ldhlf   | setana.viridis | Sevir:9G369500 |

Showing 1 to 9 of 9 entries

Previous 1 Next

Diel Explorer

Welcome Sample Info Search and Browse Data Plot Data Adding Your Own Data Contact Us

Plot Data

Warning: Attempting to plot too much data on line graph will be slow/unresponsive and messy.

Plot Selected Data as Line Graph

Plot Selected Data as Heatmap

Color Line Graph By

Dataset

GENEID

Scale Heatmap

Row

Column

Average Replicates

Yes

No

Download Line Graph Download Heatmap

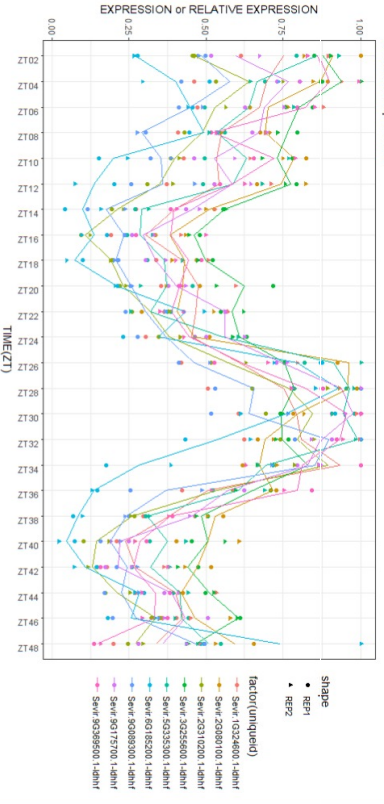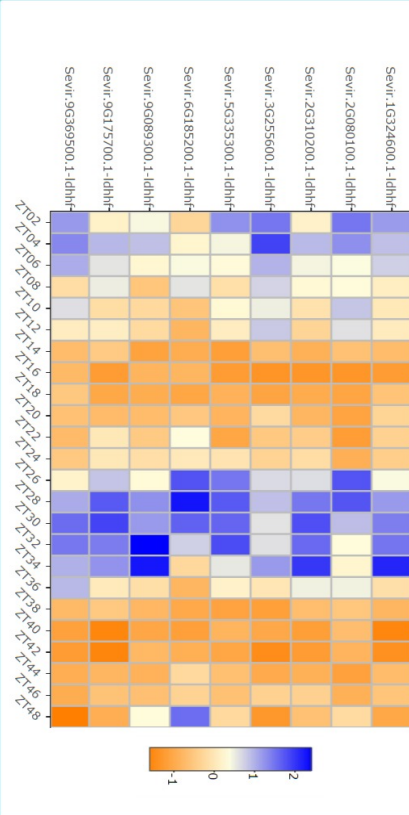

# Supplemental Figure 4

## Phase of Circadian Genes in *S. viridis*

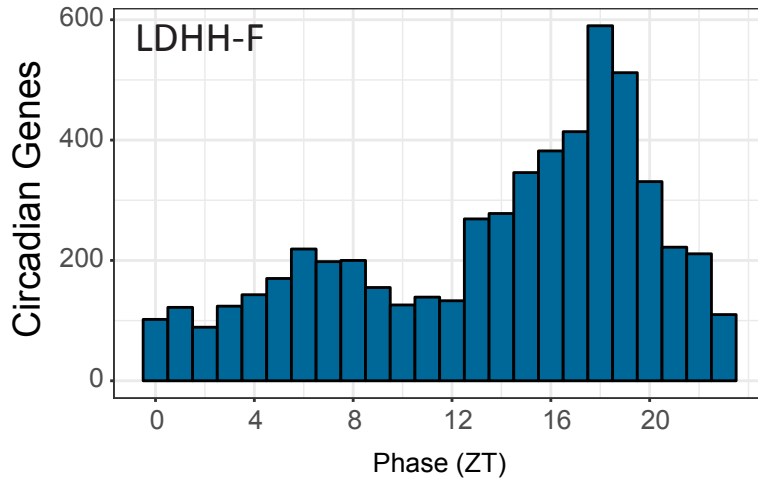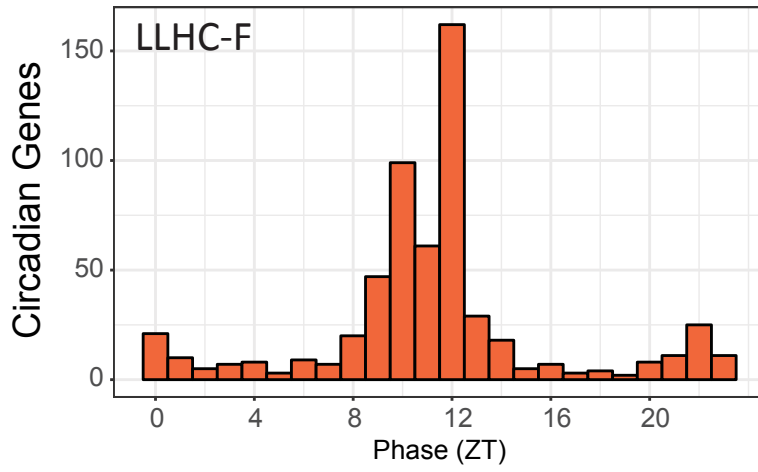

# Supplemental Figure 5

## AT5G61380 (AtTOC1)

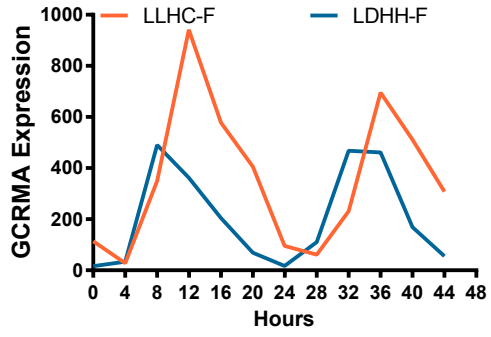

## AT5G17300 (AtRVE1)

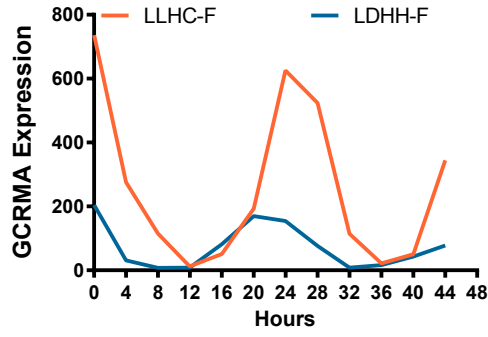

## AT5G02810 (AtPRR7)

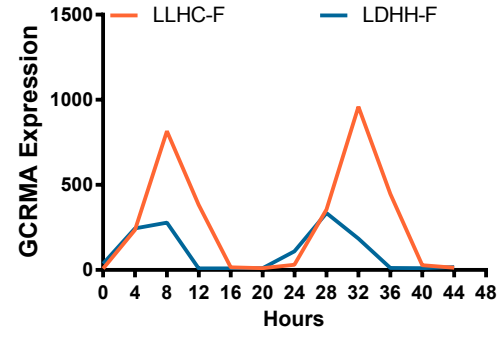

## AT1G01060 (AtLHY)

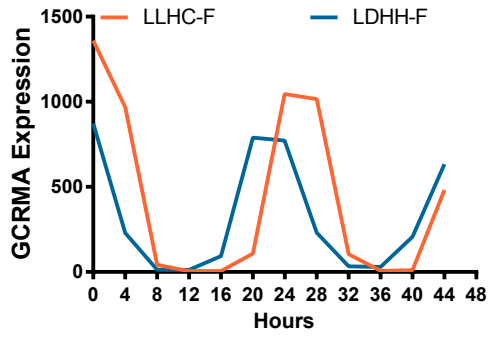

## AT3G46640 (AtLUX)

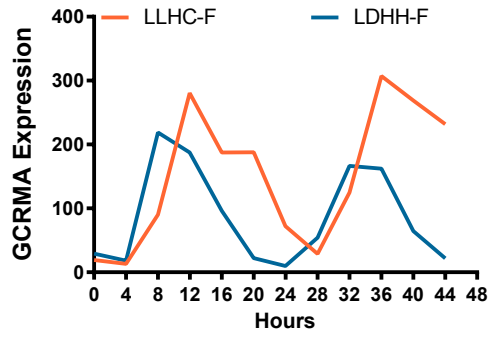

## AT2G25930 (AtELF3)

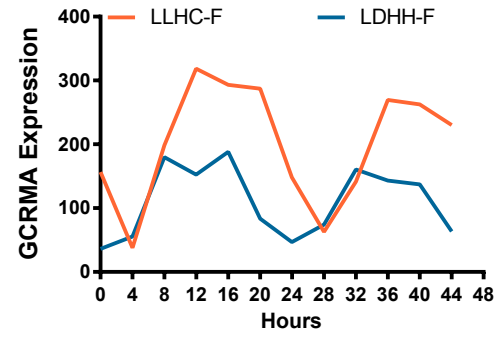

## Supplemental Figure 6

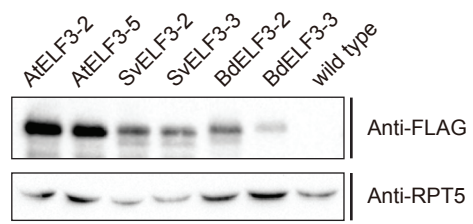



# Supplemental Figure 7

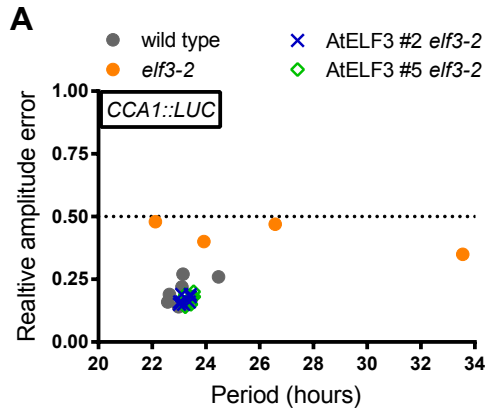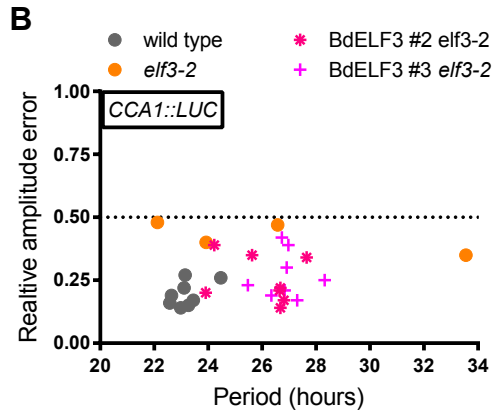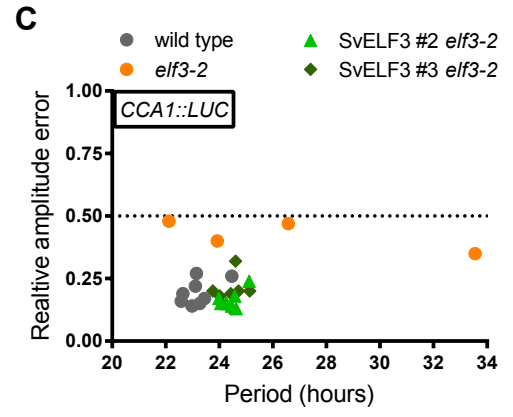

**Supplemental Table 1.** List of all primers used.

| Primers used for cloning <i>At/Bd/SvELF3</i> coding sequence (CDS) without any stop codon <sup>a</sup> |                                    |                        |
|--------------------------------------------------------------------------------------------------------|------------------------------------|------------------------|
| Amplified Fragments                                                                                    | Forward primer (5'→3')             | Reverse primer (5'→3') |
| <i>AtELF3</i>                                                                                          | <u>CACCAT</u> GAAGAGAGGGGAAAGATGAG | AGGCTTAGAGGAGTCATAGCG  |
| <i>SvELF3</i>                                                                                          | <u>CACCAT</u> GACGAGGGGAGGTG       | TGGGTCATTTGTCGCCTCTCC  |

| Primers used to generate yeast two-hybrid constructs, all with a stop codon <sup>a</sup> |                                      |                           |
|------------------------------------------------------------------------------------------|--------------------------------------|---------------------------|
| Amplified fragments                                                                      | Forward primer (5'→3')               | Reverse primer (5'→3')    |
| <i>BdELF3-stop</i>                                                                       | <u>CACCAT</u> GAGGAGGGGCGGCGG        | TTACGGATCATTCTGTTGCCTCTCC |
| <i>SvELF3-stop</i>                                                                       | <u>CACCAT</u> GACGAGGGGAGGTG         | CTATGGGTCATTTGTCGCCTCTCC  |
| <i>AtELF4</i>                                                                            | <u>CACCAT</u> GAAGAGGAACGGCGAGACGA   | TTAAGCTCTAGTTCGGCAGCACC   |
| <i>AtLUX-Nt</i> (amino acids 1-143)                                                      | <u>CACCAT</u> GGGAGAGGAAGTACAAA      | CTATTTAAGTGTTTTCCAGATAG   |
| <i>AtLUX-Ct</i> (amino acids 144-324)                                                    | <u>CACCAT</u> GCGACCGCGTTTAGTGTGGACA | TTAATTCTCATTGCGCTTCCACCT  |

| Primer sets for genotyping |                                                       |                                                        |
|----------------------------|-------------------------------------------------------|--------------------------------------------------------|
| Mutant name                | for wild type PCR (5'→3')                             | for mutant PCR (5'→3')                                 |
| <i>elf3-2</i> <sup>b</sup> | TGAGTATTTGTTCTCTCGAGC and<br>CATATGGAGGGAAGTAGCCATTAC | TGGTATTATTCTCCGCTCTTTC and<br>TTGTTCCATTAGCTGTTCAACCTA |

<sup>a</sup> CACC (underscored) were added to forward primers for cloning into the pENTR/D-TOPO vector

<sup>b</sup> (Nusinow et al., 2011)

Supplemental Table 2. A full list of At/Bd/SvELF3 associated proteins identified from AP-MS

Total Unique Peptide Count

| Identified Proteins (283)                                                                                                                 | Accession Number | Molecular Weight | ATELF3-1 | ATELF3-2 | SvELF3#2 rep1 | SvELF3#2 rep2 | SvELF3#3 rep1 | SvELF3#3 rep2 | BdELF3#2 rep1 | BdELF3#2 rep2 | BdELF3#3 rep1 | BdELF3#3 rep2 |
|-------------------------------------------------------------------------------------------------------------------------------------------|------------------|------------------|----------|----------|---------------|---------------|---------------|---------------|---------------|---------------|---------------|---------------|
| Symbols: PHYB, HY3, OOP1   phytochrome B   chr2:8140079-8144151 FORWARD LENGTH=1172                                                       | AT2G18790.1      | 129 kDa          | 33       | 34       | 41            | 40            | 43            | 40            | 31            | 31            | 36            | 35            |
| Symbols: PHYD   phytochrome D   chr4:9195602-9199486 REVERSE LENGTH=1164                                                                  | AT4G16250.1      | 129 kDa          | 10       | 11       | 11            | 13            | 13            | 12            | 11            | 10            | 13            | 12            |
| Symbols: HSC70-1, HSP70-1, AT-HSC70-1, HSC70   heat shock cognate protein 70-1   chr5:554055-556334 REVERSE LENGTH=651                    | AT5G02500.1      | 71 kDa           | 15       | 12       | 25            | 22            | 24            | 30            | 12            | 12            | 7             | 9             |
| Symbols:   Heat shock protein 70 (Hsp 70) family protein   chr3:2903434-2905632 REVERSE LENGTH=649                                        | AT3G09440.1 (+1) | 71 kDa           | 16       | 15       | 22            | 21            | 22            | 26            | 15            | 14            | 6             | 10            |
| Symbols: HSP70, ATHSP70   heat shock protein 70   chr3:3991487-3993689 REVERSE LENGTH=650                                                 | AT3G12580.1      | 71 kDa           | 12       | 9        | 15            | 16            | 17            | 20            | 10            | 10            | 4             | 6             |
| Symbols:   Heat shock protein 70 (Hsp 70) family protein   chr5:550296-552565 REVERSE LENGTH=653                                          | AT5G02490.1      | 71 kDa           | 13       | 11       | 13            | 13            | 14            | 18            | 10            | 9             | 4             | 6             |
| Symbols: Hsp70b   heat shock protein 70b   chr1:5502386-5504326 REVERSE LENGTH=646                                                        | AT1G16030.1      | 71 kDa           | 0        | 0        | 0             | 0             | 0             | 0             | 0             | 0             | 0             | 0             |
| Symbols: BdELF3_HFC                                                                                                                       | ATMGcustom02     | 86 kDa           | 1        | 0        | 1             | 0             | 1             | 0             | 26            | 27            | 22            | 20            |
| Symbols: PHYC   phytochrome C   chr5:14008049-14011619 FORWARD LENGTH=1111                                                                | AT5G35840.1      | 124 kDa          | 22       | 23       | 27            | 32            | 27            | 33            | 20            | 18            | 19            | 22            |
| Symbols: SvELF3_HFC                                                                                                                       | ATMGcustom01     | 87 kDa           | 1        | 0        | 20            | 29            | 23            | 33            | 1             | 1             | 1             | 1             |
| Symbols: AteLF3_HFC                                                                                                                       | ATMGcustom03     | 84 kDa           | 21       | 19       | 0             | 0             | 0             | 0             | 0             | 0             | 0             | 1             |
| Symbols: TZP   zinc knuckle (CCHC-type) family protein   chr5:17527261-17530207 FORWARD LENGTH=831                                        | AT5G43630.1      | 91 kDa           | 14       | 12       | 13            | 20            | 13            | 24            | 12            | 13            | 14            | 14            |
| Symbols: RBCL   ribulose-bisphosphate carboxylases   chrC:54958-56397 FORWARD LENGTH=479                                                  | ATCG00490.1      | 53 kDa           | 14       | 13       | 13            | 18            | 11            | 19            | 14            | 14            | 9             | 10            |
| Symbols: PHYE   phytochrome E   chr4:10042312-10045948 REVERSE LENGTH=1112                                                                | AT4G18130.1      | 123 kDa          | 12       | 19       | 13            | 18            | 12            | 17            | 6             | 10            | 15            | 14            |
| Symbols: TUB2   tubulin beta chain 2   chr5:25181560-25183501 FORWARD LENGTH=450                                                          | AT5G62690.1 (+1) | 51 kDa           | 10       | 9        | 2             | 7             | 3             | 9             | 7             | 5             | 4             | 3             |
| Symbols: TUB5   tubulin beta-5 chain   chr1:6938033-6940481 REVERSE LENGTH=449                                                            | AT1G20010.1      | 50 kDa           | 9        | 7        | 0             | 7             | 0             | 7             | 4             | 4             | 3             | 2             |
| Symbols: TUB6   beta-6 tubulin   chr5:3961317-3962971 REVERSE LENGTH=449                                                                  | AT5G12250.1      | 51 kDa           | 7        | 6        | 0             | 4             | 0             | 6             | 6             | 4             | 3             | 2             |
| Symbols: TUB9   tubulin beta-9 chain   chr4:11182218-11183840 FORWARD LENGTH=444                                                          | AT4G20890.1      | 50 kDa           | 9        | 8        | 0             | 6             | 2             | 7             | 5             | 4             | 3             | 2             |
| Symbols: TUB7   tubulin beta-7 chain   chr2:12644258-12645932 REVERSE LENGTH=449                                                          | AT2G29550.1      | 51 kDa           | 9        | 8        | 0             | 5             | 3             | 8             | 6             | 5             | 3             | 2             |
| Symbols: TUB4   tubulin beta chain 4   chr5:17858442-17860994 REVERSE LENGTH=444                                                          | AT5G44340.1      | 50 kDa           | 9        | 8        | 0             | 5             | 2             | 7             | 6             | 4             | 3             | 2             |
| Symbols: TUB8   tubulin beta 8   chr5:8042962-8044528 FORWARD LENGTH=449                                                                  | AT5G23860.1 (+1) | 51 kDa           | 9        | 8        | 0             | 6             | 3             | 6             | 6             | 5             | 3             | 0             |
| Symbols: PCH1   F-box family protein   chr2:7074940-7079181 FORWARD LENGTH=778                                                            | AT2G16365.1 (+2) | 89 kDa           | 9        | 9        | 9             | 9             | 14            | 11            | 9             | 9             | 11            | 11            |
| Symbols: GAPC-2, GAPC2   glyceraldehyde-3-phosphate dehydrogenase C2   chr1:4608465-4610494 REVERSE LENGTH=338                            | AT1G13440.1      | 37 kDa           | 8        | 7        | 4             | 15            | 6             | 12            | 4             | 3             | 6             | 2             |
| Symbols: GAPC, GAPC-1, GAPC1   glyceraldehyde-3-phosphate dehydrogenase C subunit 1   chr3:1081077-1083131 FORWARD LENGTH=338             | AT3G04120.1      | 37 kDa           | 7        | 7        | 4             | 15            | 6             | 12            | 4             | 3             | 6             | 2             |
| Symbols: ATPA   ATP synthase subunit alpha   chrC:9938-11461 REVERSE LENGTH=507                                                           | ATCG00120.1      | 55 kDa           | 12       | 9        | 1             | 10            | 0             | 13            | 9             | 8             | 7             | 4             |
| Symbols: TUA4, TOR2   tubulin alpha-4 chain   chr1:1356421-1358266 REVERSE LENGTH=450                                                     | AT1G04820.1 (+1) | 50 kDa           | 6        | 7        | 5             | 9             | 6             | 10            | 2             | 5             | 2             | 1             |
| Symbols: TUA3   tubulin alpha-3   chr5:6682761-6684474 REVERSE LENGTH=450                                                                 | AT5G19770.1 (+1) | 50 kDa           | 4        | 4        | 3             | 6             | 3             | 8             | 1             | 3             | 1             | 0             |
| Symbols: TUA6   Tubulin/Fts2 family protein   chr4:8548753-8550319 REVERSE LENGTH=427                                                     | AT4G14960.1      | 47 kDa           | 6        | 6        | 4             | 8             | 5             | 8             | 2             | 6             | 2             | 1             |
| Symbols: ACT8   actin 8   chr1:18216539-18217947 FORWARD LENGTH=377                                                                       | AT1G49240.1 (+1) | 42 kDa           | 3        | 3        | 2             | 5             | 3             | 4             | 3             | 3             | 3             | 3             |
| Symbols: ACT7   actin 7   chr5:3052809-3054220 FORWARD LENGTH=377                                                                         | AT5G09810.1      | 42 kDa           | 4        | 4        | 1             | 6             | 4             | 6             | 4             | 3             | 2             | 1             |
| Symbols: ACT1, AAc1   actin 1   chr2:15779761-15781241 FORWARD LENGTH=377                                                                 | AT2G37620.1 (+2) | 42 kDa           | 0        | 0        | 0             | 4             | 1             | 2             | 0             | 0             | 0             | 0             |
| Symbols: ACT4   actin 4   chr5:23950109-23951586 FORWARD LENGTH=377                                                                       | AT5G59370.1 (+1) | 42 kDa           | 0        | 0        | 0             | 4             | 0             | 3             | 1             | 1             | 1             | 0             |
| Symbols:   Actin family protein   chr2:17578683-17580222 FORWARD LENGTH=329                                                               | AT2G42170.1      | 37 kDa           | 1        | 1        | 1             | 1             | 1             | 1             | 1             | 1             | 1             | 0             |
| Symbols:   Actin-like ATPase superfamily protein   chr2:17560211-17561945 FORWARD LENGTH=378                                              | AT2G42100.1      | 42 kDa           | 0        | 0        | 0             | 0             | 0             | 0             | 0             | 0             | 0             | 0             |
| Symbols: ATRRAB8, ATRRABE1B, RABE1b   RAB GTPase homolog E1B   chr4:10990036-10991466 FORWARD LENGTH=476                                  | AT4G20360.1      | 52 kDa           | 6        | 5        | 9             | 10            | 8             | 12            | 5             | 4             | 3             | 3             |
| Symbols:   Ribosomal protein S5 family protein   chr2:17460016-17461398 REVERSE LENGTH=285                                                | AT2G41840.1      | 31 kDa           | 5        | 6        | 2             | 3             | 4             | 5             | 5             | 2             | 1             | 1             |
| Symbols: XW6   Ribosomal protein S5 family protein   chr1:21689115-21690085 FORWARD LENGTH=284                                            | AT1G58380.1 (+3) | 31 kDa           | 6        | 5        | 3             | 2             | 5             | 5             | 3             | 3             | 1             | 0             |
| Symbols:   Ribosomal protein S5 family protein   chr3:21279824-21280887 REVERSE LENGTH=276                                                | AT3G57490.1      | 30 kDa           | 3        | 0        | 0             | 0             | 0             | 0             | 0             | 0             | 0             | 0             |
| Symbols: TIC   time for coffee   chr3:7913181-7918967 FORWARD LENGTH=1555                                                                 | AT3G22380.2      | 165 kDa          | 5        | 5        | 4             | 12            | 3             | 15            | 4             | 3             | 1             | 1             |
| Symbols: ELF4   Protein of unknown function (DUF1313)   chr2:16734545-16734880 REVERSE LENGTH=111                                         | AT4G0080.1       | 12 kDa           | 4        | 4        | 3             | 5             | 4             | 4             | 4             | 4             | 5             | 5             |
| Symbols: GAPA, GAPA-1   glyceraldehyde 3-phosphate dehydrogenase A subunit   chr3:9795226-9796848 FORWARD LENGTH=396                      | AT3G26650.1      | 42 kDa           | 11       | 8        | 3             | 13            | 4             | 15            | 5             | 4             | 3             | 2             |
| Symbols: GAPA-2   glyceraldehyde 3-phosphate dehydrogenase A subunit 2   chr1:4392634-4393850 REVERSE LENGTH=350                          | AT1G19003.1 (+1) | 38 kDa           | 11       | 8        | 3             | 11            | 4             | 12            | 5             | 3             | 2             | 1             |
| Symbols:   Ribosomal protein L6 family   chr1:12010986-12012223 FORWARD LENGTH=194                                                        | AT1G31120.1 (+1) | 22 kDa           | 4        | 4        | 6             | 10            | 5             | 9             | 4             | 5             | 5             | 5             |
| Symbols:   Ribosomal protein L6 family   chr4:6463201-6464458 REVERSE LENGTH=194                                                          | AT4G10450.1      | 22 kDa           | 1        | 2        | 0             | 3             | 0             | 2             | 2             | 2             | 2             | 2             |
| Symbols: COP1, ATCOP1, DET340, FUS1, EMB168   Transducin/WD40 repeat-like superfamily protein   chr2:13978000-13983282 FORWARD LENGTH=675 | AT2G2950.1       | 76 kDa           | 8        | 9        | 6             | 4             | 3             | 5             | 1             | 2             | 6             | 4             |
| Symbols: IMPA-2   importin alpha isoform 2   chr4:9134450-9137134 REVERSE LENGTH=535                                                      | AT4G16143.1 (+1) | 59 kDa           | 2        | 2        | 1             | 8             | 0             | 8             | 10            | 9             | 2             | 4             |
| Symbols: AT-IMP, ATKAP ALPHA, AIMP ALPHA, IMPA-1, IMPA1   importin alpha isoform 1   chr3:2120559-2123555 FORWARD LENGTH=532              | AT3G06720.1 (+1) | 59 kDa           | 0        | 0        | 0             | 2             | 0             | 2             | 2             | 1             | 0             | 0             |
| Symbols: IMPA-6   importin alpha isoform 6   chr1:584397-587036 FORWARD LENGTH=538                                                        | AT1G02690.1 (+1) | 59 kDa           | 0        | 0        | 0             | 0             | 0             | 0             | 0             | 0             | 0             | 0             |
| Symbols: IMPA-4   importin alpha isoform 4   chr1:2994506-2997833 FORWARD LENGTH=538                                                      | AT1G09270.1 (+2) | 59 kDa           | 0        | 0        | 0             | 0             | 0             | 0             | 0             | 0             | 0             | 0             |
| Symbols: MTO3, SAM53, MAT4   S-adenosylmethionine synthetase family protein   chr3:5952484-5953665 REVERSE LENGTH=393                     | AT3G17390.1      | 43 kDa           | 9        | 7        | 2             | 5             | 0             | 6             | 1             | 0             | 0             | 0             |
| Symbols: MAT3   methionine adenosyltransferase 3   chr2:15479721-15480893 REVERSE LENGTH=390                                              | AT2G6880.1 (+1)  | 42 kDa           | 4        | 2        | 2             | 1             | 0             | 2             | 0             | 0             | 0             | 0             |
| Symbols: SAM-2, MAT2, SAM2, AtSAM2   S-adenosylmethionine synthetase 2   chr4:796298-797479 REVERSE LENGTH=393                            | AT4G01850.1 (+1) | 43 kDa           | 5        | 2        | 0             | 1             | 0             | 2             | 0             | 0             | 0             | 0             |
| Symbols: SAM1, SAM-1, MAT1, AtSAM1   S-adenosylmethionine synthetase 1   chr1:519037-520218 FORWARD LENGTH=393                            | AT1G02500.1 (+1) | 43 kDa           | 4        | 1        | 0             | 2             | 0             | 3             | 0             | 0             | 0             | 0             |
| Symbols: RCA   rubisco activase   chr2:16570951-1657345 REVERSE LENGTH=474                                                                | AT2G39730.1      | 52 kDa           | 7        | 7        | 3             | 4             | 6             | 7             | 6             | 3             | 2             | 2             |
| Symbols: PCL1, LUX   Homeodomain-like superfamily protein   chr3:17183248-17184219 FORWARD LENGTH=323                                     | AT3G46640.1 (+1) | 35 kDa           | 1        | 1        | 3             | 6             | 3             | 7             | 1             | 1             | 1             | 3             |
| Symbols: GS2, GLN2, ATGSL1   glutamine synthetase 2   chr5:13831220-13833239 FORWARD LENGTH=430                                           | AT5G35630.1 (+2) | 47 kDa           | 6        | 5        | 3             | 8             | 3             | 7             | 5             | 4             | 1             | 1             |
| Symbols: CAT3, SEN2, ATCAT3   catalase 3   chr1:7143142-7146193 FORWARD LENGTH=485                                                        | AT1G20620.5      | 56 kDa           | 13       | 11       | 2             | 8             | 1             | 9             | 7             | 4             | 1             | 1             |
| Symbols:   Clathrin, heavy chain   chr3:3482575-3491667 REVERSE LENGTH=1705                                                               | AT3G11130.1      | 193 kDa          | 16       | 10       | 0             | 2             | 0             | 5             | 2             | 1             | 0             | 0             |
| Symbols:   Clathrin, heavy chain   chr3:2587171-2595411 REVERSE LENGTH=1703                                                               | AT3G08530.1      | 193 kDa          | 15       | 9        | 0             | 2             | 0             | 5             | 2             | 1             | 0             | 0             |
| Symbols:   Ribosomal protein S3 family protein   chr3:19951547-19952782 FORWARD LENGTH=249                                                | AT3G53870.1      | 27 kDa           | 4        | 4        | 3             | 4             | 3             | 5             | 2             | 2             | 1             | 1             |
| Symbols:   Ribosomal protein S3 family protein   chr2:13450384-13451669 FORWARD LENGTH=250                                                | AT2G31610.1      | 28 kDa           | 5        | 5        | 3             | 4             | 3             | 6             | 3             | 2             | 1             | 1             |
| Symbols:   Ribosomal protein S3 family protein   chr5:13710355-13712192 REVERSE LENGTH=248                                                | AT5G35530.1      | 27 kDa           | 5        | 5        | 3             | 4             | 3             | 5             | 3             | 1             | 1             | 1             |
| Symbols: EIF4A1, RH4, TIF4A1   eukaryotic translation initiation factor 4A1   chr3:4592635-4594128 REVERSE LENGTH=412                     | AT3G13920.1 (+1) | 47 kDa           | 7        | 6        | 3             | 5             | 5             | 7             | 3             | 2             | 2             | 2             |
| Symbols: EIF4A-2   eif4a-2   chr1:20260495-20262018 FORWARD LENGTH=412                                                                    | AT1G54270.1      | 47 kDa           | 5        | 4        | 3             | 5             | 5             | 7             | 3             | 2             | 2             | 2             |
| Symbols: EIF4A-III   eukaryotic initiation factor 4A-III   chr3:6863790-6866242 FORWARD LENGTH=408                                        | AT3G19760.1      | ? kDa            | 0        | 0        | 0             | 0             | 0             | 0             | 0             | 0             | 0             | 0             |
| Symbols: BIP, BIP2   Heat shock protein 70 (Hsp 70) family protein   chr5:16807697-16810480 REVERSE LENGTH=668                            | AT5G42020.1      | 74 kDa           | 3        | 5        | 5             | 9             | 7             | 11            | 1             | 2             | 3             | 2             |
| Symbols: DAYSLEEPER   BED zinc finger; NAT family dimerisation domain   chr3:14321838-14323928 FORWARD LENGTH=696                         | AT3G42170.1      | 79 kDa           | 3        | 5        | 0             | 7             | 0             | 12            | 3             | 4             | 2             | 0             |
| MLK2   Symbols:   Protein kinase family protein   chr3:1014412-1018244 REVERSE LENGTH=701                                                 | AT3G03940.1      | 78 kDa           | 8        | 4        | 0             | 3             | 0             | 1             | 8             | 6             | 6             | 5             |
| MLK1   Symbols:   Protein kinase family protein   chr5:6010215-6013724 REVERSE LENGTH=691                                                 | AT5G18190.1      | 77 kDa           | 5        | 5        | 0             | 2             | 0             | 1             | 6             | 6             | 5             | 5             |
| Symbols: GABP   glyceraldehyde-3-phosphate dehydrogenase B subunit   chr1:16127552-16129584 FORWARD LENGTH=447                            | AT1G42970.1      | 48 kDa           | 9        | 7        | 1             | 11            | 1             | 15            | 5             | 4             | 3             | 1             |
| Symbols: SPA1   SPA (suppressor of phyA-105) protein family   chr2:19022572-19026821 REVERSE LENGTH=1029                                  | AT2G46340.1      | 115 kDa          | 8        | 7        | 2             | 4             | 2             | 4             | 0             | 6             | 5             | 0             |
| Symbols:   Ribulose biphosphate carboxylase (small chain) family protein   chr5:15377501-15378206 REVERSE LENGTH=181                      | AT5G38410.1      | 20 kDa           | 5        | 4        | 4             | 7             | 5             | 7             | 5             | 3             | 2             | 5             |
| Symbols:   Ribulose biphosphate carboxylase (small chain) family protein   chr5:15384350-15385155 REVERSE LENGTH=181                      | AT5G38430.1      | 20 kDa           | 4        | 3        | 2             | 3             | 2             | 3             | 3             | 1             | 2             | 1             |
| Symbols: PHYA, FHY2, FRE1, HYS   phytochrome A   chr1:3095498-3099216 REVERSE LENGTH=1122                                                 | AT1G09570.1      | 125 kDa          | 1        | 1        | 7             | 5             | 7             | 2             | 0             | 2             | 6             | 3             |
| Symbols:   Ribosomal protein L4/L1 family   chr3:2953813-2955444 FORWARD LENGTH=406                                                       | AT3G09630.1 (+1) | 45 kDa           | 1        | 1        | 1             | 2             | 1             | 7             | 2             | 1             | 1             | 0             |
| Symbols:   Ribosomal protein L4/L1 family   chr5:657830-659526 FORWARD LENGTH=407                                                         | AT5G02870.1 (+1) | 45 kDa           | 2        | 2        | 1             | 2             | 1             | 6             | 2             | 1             | 0             | 0             |
| Symbols: PSC51, ATPPCS   delta1-pyrroline-5-carboxylate synthase 1   chr2:16598516-16602939 REVERSE LENGTH=717                            | AT2G38000.1 (+1) | 78 kDa           | 7        | 6        | 1             | 4             | 1             | 9             | 4             | 3             | 2             | 0             |
| Symbols: PSC52   delta 1-pyrroline-5-carboxylate synthase 2   chr3:20624278-20628989 REVERSE LENGTH=726                                   | AT3G55610.1      | 79 kDa           | 0        | 0        | 0             | 0             | 0             | 0             | 0             | 0             | 0             | 0             |
| Symbols: RBSC1A   ribulose biphosphate carboxylase small chain 1A   chr1:25048465-25049249 REVERSE LENGTH=180                             | AT1G67090.1      | 20 kDa           | 5        | 5        | 4             | 7             | 5             | 7             | 4             | 3             | 1             | 3             |
| Symbols: ATCMS, ATMETS, ATMS1   Cobalamin-independent synthase family protein   chr5:5935771-5939                                         |                  |                  |          |          |               |               |               |               |               |               |               |               |

|                                                                                                                                |                  |         |    |   |   |   |   |    |   |   |   |   |
|--------------------------------------------------------------------------------------------------------------------------------|------------------|---------|----|---|---|---|---|----|---|---|---|---|
| Symbols: PGK1   phosphoglycerate kinase 1   chr3:4061127-4063140 REVERSE LENGTH=481                                            | AT3G12780.1      | 50 kDa  | 5  | 4 | 0 | 6 | 0 | 9  | 3 | 2 | 1 | 0 |
| Symbols: PGK   phosphoglycerate kinase   chr1:29924347-29926295 REVERSE LENGTH=401                                             | AT1G79550.1 (+1) | 42 kDa  | 2  | 0 | 0 | 0 | 0 | 0  | 1 | 1 | 1 | 0 |
| Symbols:   Phosphoglycerate kinase family protein   chr1:21028622-21030454 FORWARD LENGTH=405                                  | AT1G56190.2      | 43 kDa  | 3  | 0 | 0 | 3 | 0 | 4  | 0 | 0 | 0 | 0 |
| Symbols: LOS1   Ribosomal protein S5/Elongation factor G/III/V family protein   chr1:20968245-20971077 REVERSE LENGTH=843      | AT1G56070.1      | 94 kDa  | 4  | 3 | 1 | 3 | 2 | 9  | 1 | 1 | 0 | 0 |
| Symbols:   structural constituent of ribosome   chrC:82826-83482 REVERSE LENGTH=218                                            | ATCG08000.1      | 25 kDa  | 6  | 4 | 1 | 4 | 1 | 6  | 1 | 0 | 0 | 0 |
| Symbols: CAT2   catalase 2   chr4:16700937-16703215 REVERSE LENGTH=492                                                         | AT4G35090.1      | 57 kDa  | 10 | 6 | 2 | 8 | 1 | 7  | 4 | 4 | 1 | 1 |
| Symbols:   Ribosomal protein S27a / Ubiquitin family protein   chr1:8314940-8315410 FORWARD LENGTH=156                         | AT1G23410.1 (+3) | 18 kDa  | 3  | 3 | 1 | 2 | 1 | 2  | 3 | 2 | 1 | 2 |
| Symbols: UBQ9   ubiquitin 9   chr5:14952782-14953750 REVERSE LENGTH=322                                                        | AT5G37640.1      | 36 kDa  | 0  | 2 | 0 | 0 | 0 | 0  | 0 | 0 | 0 | 0 |
| Symbols: UBQ12   ubiquitin 12   chr1:20549533-20550225 FORWARD LENGTH=230                                                      | AT1G55060.1      | 26 kDa  | 0  | 0 | 0 | 0 | 0 | 0  | 0 | 0 | 0 | 0 |
| Symbols: UBQ8   ubiquitin 8   chr3:3004111-3006006 REVERSE LENGTH=631                                                          | AT3G09790.1      | 72 kDa  | 0  | 0 | 0 | 0 | 0 | 0  | 0 | 0 | 0 | 0 |
| Symbols:   GTP binding Elongation factor Tu family protein   chr1:2455559-2457001 FORWARD LENGTH=449                           | AT1G07920.1 (+5) | 50 kDa  | 4  | 3 | 1 | 4 | 1 | 6  | 3 | 1 | 2 | 1 |
| Symbols:   Ribosomal protein L13 family protein   chr3:9064613-9065871 FORWARD LENGTH=206                                      | AT3G24830.1      | 23 kDa  | 1  | 1 | 1 | 1 | 2 | 1  | 2 | 2 | 0 | 0 |
| Symbols:   Ribosomal protein L13 family protein   chr3:2252092-2253332 FORWARD LENGTH=206                                      | AT3G07110.1 (+1) | 23 kDa  | 2  | 3 | 1 | 1 | 1 | 2  | 1 | 2 | 3 | 0 |
| Symbols:   Ribosomal protein L13 family protein   chr5:19771315-19772686 REVERSE LENGTH=206                                    | AT5G48760.1 (+1) | 24 kDa  | 0  | 0 | 0 | 1 | 0 | 1  | 1 | 1 | 0 | 0 |
| Symbols:   Ribosomal protein L13 family protein   chr4:7655133-7656542 REVERSE LENGTH=206                                      | AT4G13170.1      | 24 kDa  | 0  | 2 | 0 | 1 | 0 | 0  | 0 | 2 | 0 | 0 |
| Symbols: HOG1, EMB1395, SAHH1, MEE58, ATSAHH1   S-adenosyl-L-homocysteine hydrolase   chr4:8054931-8056676 FORWARD LENGTH=485  | AT4G13940.1      | 53 kDa  | 3  | 4 | 1 | 3 | 1 | 5  | 1 | 2 | 0 | 0 |
| Symbols: SAHH2, ATSAHH2   S-adenosyl-L-homocysteine (SAH) hydrolase 2   chr3:8588013-8589671 REVERSE LENGTH=485                | AT3G2810.1       | 53 kDa  | 2  | 2 | 0 | 1 | 1 | 3  | 0 | 1 | 2 | 0 |
| Symbols: HOG1, SAHH1   S-adenosyl-L-homocysteine hydrolase   chr4:8054931-8056676 FORWARD LENGTH=325                           | AT4G13940.4      | 36 kDa  | 0  | 0 | 0 | 0 | 0 | 0  | 0 | 0 | 0 | 0 |
| Symbols: CRB, CSP41B, HIP1.3   chloroplast RNA binding   chr1:3015473-3018035 FORWARD LENGTH=378                               | AT1G09340.1      | 43 kDa  | 4  | 3 | 1 | 1 | 1 | 4  | 0 | 1 | 0 | 0 |
| Symbols: ACC1, AT-ACC1, EMB22, GK, PAS3   acetyl-CoA carboxylase 1   chr1:13534196-13543773 FORWARD LENGTH=2254                | AT1G36160.1 (+1) | 251 kDa | 12 | 1 | 0 | 1 | 0 | 2  | 0 | 0 | 0 | 0 |
| Symbols:   Ribosomal protein S5 domain 2-like superfamily protein   chr5:6090253-6090693 REVERSE LENGTH=146                    | AT5G18380.1 (+1) | 17 kDa  | 3  | 4 | 1 | 3 | 1 | 2  | 3 | 3 | 0 | 0 |
| Symbols:   Ribosomal protein S5 domain 2-like superfamily protein   chr2:3781442-3781882 FORWARD LENGTH=146                    | AT2G09990.1      | 17 kDa  | 2  | 2 | 0 | 2 | 0 | 1  | 2 | 2 | 0 | 0 |
| Symbols: CA1   carbonic anhydrase 1   chr3:194853-197873 REVERSE LENGTH=347                                                    | AT3G01500.2 (+1) | 37 kDa  | 2  | 2 | 1 | 3 | 1 | 5  | 3 | 1 | 0 | 0 |
| Symbols: CA2, CA18, BETA CA2   carbonic anhydrase 2   chr5:4758257-4762382 FORWARD LENGTH=331                                  | AT5G14740.1 (+1) | 37 kDa  | 1  | 1 | 1 | 3 | 1 | 6  | 1 | 0 | 0 | 0 |
| Symbols: ATAN1, LWD1   Transducin/WD40 repeat-like superfamily protein   chr1:14385114-14396154 REVERSE LENGTH=346             | AT1G12910.1      | 39 kDa  | 5  | 7 | 5 | 8 | 4 | 5  | 4 | 3 | 3 | 3 |
| Symbols: MLK4   Protein kinase family protein   chr3:4469434-4473234 FORWARD LENGTH=703                                        | AT3G13670.1      | 79 kDa  | 5  | 6 | 0 | 0 | 0 | 10 | 6 | 6 | 7 | 0 |
| Symbols: RPS6, RPS6A   ribosomal protein S6   chr4:15346306-15347714 REVERSE LENGTH=250                                        | AT4G31700.1      | 28 kDa  | 2  | 4 | 0 | 1 | 0 | 4  | 4 | 2 | 1 | 1 |
| Symbols:   Ribosomal protein L30/L7 family protein   chr2:132943-134264 REVERSE LENGTH=242                                     | AT2G01250.1      | 28 kDa  | 4  | 3 | 1 | 0 | 1 | 2  | 1 | 2 | 1 | 0 |
| Symbols:   Ribosomal protein L30/L7 family protein   chr2:18249227-18250417 REVERSE LENGTH=247                                 | AT2G44120.2      | 29 kDa  | 2  | 3 | 0 | 1 | 0 | 2  | 0 | 1 | 0 | 0 |
| Symbols:   Ribosomal protein L30/L7 family protein   chr3:4433809-4435109 FORWARD LENGTH=244                                   | AT3G13580.1 (+2) | 28 kDa  | 1  | 2 | 0 | 0 | 0 | 1  | 1 | 0 | 0 | 0 |
| Symbols:   Coatomer, alpha subunit   chr2:9152428-9156577 FORWARD LENGTH=1218                                                  | AT2G21390.1      | 136 kDa | 2  | 0 | 0 | 2 | 0 | 9  | 0 | 0 | 0 | 0 |
| Symbols:   Coatomer, alpha subunit   chr1:22919814-22923728 FORWARD LENGTH=1216                                                | AT1G62020.1      | 137 kDa | 2  | 1 | 0 | 0 | 0 | 5  | 0 | 0 | 0 | 0 |
| Symbols: CAB3, AB180, LHC81.2   chlorophyll A/B binding protein 3   chr1:10472443-10473246 REVERSE LENGTH=267                  | AT1G29910.1 (+1) | 28 kDa  | 2  | 2 | 2 | 2 | 1 | 1  | 1 | 1 | 0 | 0 |
| Symbols: LHC82.2, LHC82   photosystem II light harvesting complex gene 2.2   chr2:1799436-1800329 REVERSE LENGTH=265           | AT2G0570.1 (+2)  | 29 kDa  | 1  | 1 | 2 | 1 | 1 | 2  | 0 | 0 | 0 | 0 |
| Symbols: CAB1, AB140, CAB140, LHC81.3   chlorophyll A/B binding protein 1   chr1:10478071-10478874 FORWARD LENGTH=267          | AT1G29930.1      | 28 kDa  | 2  | 2 | 2 | 2 | 2 | 1  | 1 | 1 | 0 | 0 |
| Symbols: HSP60-2   heat shock protein 60-2   chr2:14075093-14078568 REVERSE LENGTH=585                                         | AT2G33210.1 (+1) | 62 kDa  | 1  | 3 | 1 | 3 | 1 | 2  | 1 | 0 | 0 | 0 |
| Symbols: HSP60, HSP60-3B   heat shock protein 60   chr3:8669013-8672278 FORWARD LENGTH=577                                     | AT3G23990.1      | 61 kDa  | 2  | 3 | 1 | 3 | 2 | 1  | 2 | 1 | 0 | 0 |
| Symbols:   Ribosomal protein S3Ae   chr3:1329751-1331418 FORWARD LENGTH=262                                                    | AT3G08480.1      | 30 kDa  | 1  | 2 | 0 | 1 | 0 | 3  | 1 | 1 | 1 | 0 |
| Symbols:   Ribosomal protein S3Ae   chr4:16548724-16550222 FORWARD LENGTH=262                                                  | AT4G34670.1      | 30 kDa  | 2  | 2 | 1 | 2 | 1 | 3  | 1 | 0 | 0 | 0 |
| Symbols: UBP12   ubiquitin-specific protease 12   chr5:2019545-2027834 REVERSE LENGTH=1116                                     | AT5G06600.1 (+1) | 131 kDa | 0  | 0 | 0 | 3 | 0 | 3  | 1 | 1 | 0 | 0 |
| Symbols: UBP13   ubiquitin-specific protease 13   chr3:3761758-3770290 REVERSE LENGTH=1115                                     | AT3G1910.1 (+1)  | 131 kDa | 0  | 0 | 0 | 3 | 1 | 2  | 1 | 0 | 0 | 0 |
| Symbols: NIT1, ATNIT1, NIT1   nitrilase 1   chr3:15986901-15988841 FORWARD LENGTH=346                                          | AT3G44310.1 (+1) | 38 kDa  | 1  | 2 | 1 | 0 | 4 | 1  | 1 | 1 | 1 | 1 |
| Symbols: ARP1, emb220, RPL3A, RP1   ribosomal protein 1   chr1:16266992-16268631 FORWARD LENGTH=389                            | AT1G43170.1 (+7) | 45 kDa  | 2  | 1 | 0 | 2 | 0 | 1  | 1 | 0 | 0 | 0 |
| Symbols: RD21, RD21A   Granulin repeat cysteine protease family protein   chr1:17283139-17285609 REVERSE LENGTH=462            | AT1G47128.1      | 51 kDa  | 0  | 3 | 0 | 2 | 0 | 2  | 0 | 2 | 0 | 0 |
| Symbols: ATPB, PB   ATP synthase subunit beta   chrC:52660-54156 REVERSE LENGTH=498                                            | ATCG04080.1      | 54 kDa  | 4  | 5 | 0 | 3 | 0 | 3  | 2 | 2 | 1 | 0 |
| Symbols: PYK10, PSR3.1, BGLU23, LEB   Glycosyl hydrolase superfamily protein   chr3:2840657-2843730 REVERSE LENGTH=524         | AT3G09260.1      | ?       | 1  | 1 | 1 | 3 | 0 | 3  | 1 | 1 | 0 | 0 |
| Symbols: KAS1, KAS1   3-ketoacyl-acyl carrier protein synthase 1   chr5:18774439-18776629 REVERSE LENGTH=473                   | AT5G46290.1      | 50 kDa  | 2  | 4 | 3 | 1 | 2 | 3  | 2 | 2 | 0 | 0 |
| Symbols: RPL2.1   ribosomal protein L2   chrC:84337-85843 REVERSE LENGTH=274                                                   | ATCG0830.1 (+1)  | 30 kDa  | 3  | 2 | 0 | 2 | 0 | 3  | 3 | 4 | 0 | 0 |
| Symbols: ASN2   asparagine synthetase 2   chr5:25969224-25972278 FORWARD LENGTH=578                                            | AT5G65010.1 (+1) | 65 kDa  | 3  | 2 | 0 | 1 | 0 | 4  | 2 | 2 | 0 | 0 |
| Symbols: ASN1, DIN6, AT-ASN1   glutamine-dependent asparagine synthase 1   chr3:17438445-17441043 REVERSE LENGTH=512           | AT3G47340.2      | 58 kDa  | 0  | 0 | 0 | 0 | 0 | 0  | 0 | 0 | 0 | 0 |
| Symbols: ASN3   asparagine synthetase 3   chr5:3212934-3216418 REVERSE LENGTH=578                                              | AT5G10240.1 (+1) | 65 kDa  | 0  | 0 | 0 | 0 | 0 | 0  | 0 | 0 | 0 | 0 |
| Symbols: PIP2A, PIP2, PIP2.1   plasma membrane intrinsic protein 2A   chr3:19803906-19805454 REVERSE LENGTH=287                | AT3G53420.1 (+1) | 30 kDa  | 4  | 4 | 0 | 0 | 1 | 2  | 1 | 0 | 0 | 0 |
| Symbols:   Ribosomal protein S10p/S20e family protein   chr3:16471606-16472312 REVERSE LENGTH=124                              | AT3G45030.1 (+2) | 14 kDa  | 2  | 1 | 1 | 1 | 1 | 2  | 1 | 1 | 1 | 1 |
| Symbols:   Ribosomal protein S10p/S20e family protein   chr3:17453671-17454437 REVERSE LENGTH=122                              | AT3G47370.1 (+2) | 14 kDa  | 0  | 0 | 0 | 0 | 0 | 0  | 0 | 0 | 0 | 0 |
| Symbols:   Coatomer, beta subunit   chr4:15269460-15272693 FORWARD LENGTH=948                                                  | AT4G31490.1      | 106 kDa | 5  | 2 | 0 | 1 | 0 | 4  | 0 | 0 | 0 | 0 |
| Symbols:   Coatomer, beta subunit   chr4:15264145-15267384 FORWARD LENGTH=948                                                  | AT4G31480.1 (+1) | 106 kDa | 5  | 2 | 0 | 1 | 0 | 3  | 0 | 0 | 0 | 0 |
| Symbols: MLK3   Protein kinase family protein   chr2:10985118-10988652 REVERSE LENGTH=673                                      | AT2G25760.1      | 76 kDa  | 2  | 3 | 0 | 1 | 0 | 5  | 4 | 4 | 4 | 4 |
| Symbols: RPT3   regulatory particle triple-A ATPase 3   chr5:23569155-23571116 FORWARD LENGTH=408                              | AT5G58290.1      | 46 kDa  | 3  | 3 | 1 | 1 | 1 | 2  | 1 | 1 | 0 | 0 |
| Symbols: CPN60B, LEN1   chaperonin 60 beta   chr1:20715717-20718673 REVERSE LENGTH=600                                         | AT1G55490.1 (+1) | 64 kDa  | 2  | 4 | 0 | 3 | 0 | 2  | 2 | 2 | 1 | 0 |
| Symbols:   TCP-1/cpn60 chaperonin family protein   chr5:22874058-22876966 FORWARD LENGTH=597                                   | AT5G55000.1 (+1) | 63 kDa  | 0  | 2 | 0 | 0 | 0 | 0  | 0 | 0 | 0 | 0 |
| Symbols: ATARCA, RACK1A_AT, RACK1A   Transducin/WD40 repeat-like superfamily protein   chr1:6222325-6223901 FORWARD LENGTH=327 | AT1G18080.1      | 36 kDa  | 1  | 1 | 0 | 2 | 0 | 3  | 1 | 0 | 0 | 0 |
| Symbols: RACK1B_AT   receptor for activated C kinase 1B   chr1:17981977-17983268 REVERSE LENGTH=326                            | AT1G48630.1      | 36 kDa  | 3  | 0 | 0 | 0 | 0 | 2  | 0 | 1 | 0 | 0 |
| Symbols: RACK1C_AT   receptor for activated C kinase 1C   chr3:6211109-6212371 REVERSE LENGTH=326                              | AT3G18130.1      | 36 kDa  | 0  | 0 | 0 | 0 | 0 | 0  | 0 | 0 | 0 | 0 |
| Symbols: AHA2, PMA2, HA2   H(+)-ATPase 2   chr4:14770820-14775920 REVERSE LENGTH=948                                           | AT4G30190.1 (+1) | 104 kDa | 4  | 3 | 0 | 1 | 0 | 2  | 0 | 0 | 0 | 0 |
| Symbols: AHA1, PMA, OST2, HA1   H(+)-ATPase 1   chr2:8221858-8222768 FORWARD LENGTH=949                                        | AT2G18960.1      | 104 kDa | 4  | 2 | 0 | 1 | 0 | 2  | 0 | 0 | 0 | 0 |
| Symbols: AHA7, HA7   H(+)-ATPase 7   chr3:22298763-22303509 FORWARD LENGTH=961                                                 | AT3G60330.1 (+1) | 106 kDa | 1  | 0 | 0 | 0 | 0 | 0  | 0 | 0 | 0 | 0 |
| Symbols: AHA4, HA4   H(+)-ATPase 4   chr3:17693015-17697801 FORWARD LENGTH=960                                                 | AT3G47950.1      | 106 kDa | 0  | 0 | 0 | 0 | 0 | 0  | 0 | 0 | 0 | 0 |
| Symbols: AHA3, ATAH3, HA3   H(+)-ATPase 3   chr5:23231208-23236381 REVERSE LENGTH=949                                          | AT5G57350.1 (+1) | 104 kDa | 0  | 0 | 0 | 0 | 0 | 0  | 0 | 0 | 0 | 0 |
| Symbols: AHA10   autoinhibited H(+)-ATPase isoform 10   chr1:5904058-5908898 FORWARD LENGTH=947                                | AT1G17260.1      | 105 kDa | 0  | 0 | 0 | 0 | 0 | 0  | 0 | 0 | 0 | 0 |
| Symbols:   ATPase, F1 complex, alpha subunit protein   chr2:3361474-3364028 FORWARD LENGTH=777                                 | AT2G07698.1      | 86 kDa  | 2  | 2 | 1 | 3 | 1 | 4  | 1 | 0 | 0 | 0 |
| Symbols: LWD2   Transducin/WD40 repeat-like superfamily protein   chr3:9793276-9794316 FORWARD LENGTH=346                      | AT3G26640.1      | 39 kDa  | 5  | 5 | 3 | 5 | 3 | 6  | 4 | 3 | 3 | 3 |
| Symbols:   ATPase, V1 complex, subunit B protein   chr1:7016971-7020290 FORWARD LENGTH=487                                     | AT1G20260.1 (+2) | 54 kDa  | 3  | 3 | 0 | 2 | 0 | 5  | 1 | 2 | 0 | 0 |
| Symbols: ATGSTF8, ATGSTF5, GST6, GSTF8   glutathione S-transferase phi 8   chr2:19558213-19559266 FORWARD LENGTH=263           | AT2G47730.1      | 29 kDa  | 3  | 2 | 0 | 0 | 0 | 4  | 0 | 0 | 0 | 0 |
| Symbols: ATPC1   ATPase, F1 complex, gamma subunit protein   chr4:2350761-2351882 REVERSE LENGTH=373                           | AT4G04640.1      | 41 kDa  | 1  | 5 | 3 | 2 | 1 | 2  | 1 | 2 | 1 | 0 |
| Symbols: FBA2   fructose-bisphosphate aldolase 2   chr4:18163714-18165659 REVERSE LENGTH=398                                   | AT4G38970.1      | 43 kDa  | 2  | 2 | 0 | 3 | 1 | 3  | 2 | 1 | 0 | 0 |
| Symbols: RPL16A   ribosomal protein large subunit 16A   chr2:17791794-17792946 FORWARD LENGTH=182                              | AT2G42740.1 (+4) | 21 kDa  | 2  | 2 | 1 | 1 | 1 | 2  | 1 | 2 | 1 | 1 |
| Symbols:   Transketolase   chr3:22454004-22456824 FORWARD LENGTH=741                                                           | AT3G60750.1 (+1) | 80 kDa  | 3  | 2 | 0 | 0 | 0 | 7  | 1 | 0 | 0 | 0 |
| Symbols:   binding   chr5:19317899-19327014 FORWARD LENGTH=1606                                                                | AT5G47690.2 (+1) | 181 kDa | 6  | 0 | 0 | 2 | 0 | 6  | 0 | 0 | 0 | 0 |
| Symbols: SAC52, RPL10, RPL10A   Ribosomal protein L16p/L10e family protein   chr1:4888270-4889408 FORWARD LENGTH=220           | AT1G14320.1      | 25 kDa  | 1  | 2 | 1 | 1 | 1 | 2  | 1 | 2 | 1 | 1 |
| Symbols: CAC3   acetyl Co-enzyme A carboxylase carboxyltransferase alpha subunit   chr2:15917612-15920749 FORWARD LENGTH=769   | AT2G38040.1 (+1) | 85 kDa  | 3  | 1 | 0 | 0 | 0 | 4  | 0 | 0 | 0 | 0 |
| Symbols: RAN-1, RAN1, ATRAN1   RAS-related nuclear protein-1   chr5:6760364-6761747 FORWARD LENGTH=221                         | AT5G20010.1 (+2) |         |    |   |   |   |   |    |   |   |   |   |

|                                                                                                                                                                     |                  |         |   |   |   |   |   |   |   |   |   |   |
|---------------------------------------------------------------------------------------------------------------------------------------------------------------------|------------------|---------|---|---|---|---|---|---|---|---|---|---|
| Symbols:   Histone superfamily protein   chr1:2369212-2369523 FORWARD LENGTH=103                                                                                    | AT1G07660.1 (+8) | 11 kDa  | 1 | 1 | 1 | 3 | 1 | 3 | 1 | 1 | 1 | 1 |
| Symbols:   oxidoreductases, acting on the aldehyde or oxo group of donors, NAD or NADP as acceptor;copper ion binding   chr2:8613168-8615649 FORWARD LENGTH=401     | AT2G19940.1 (+1) | 44 kDa  | 5 | 1 | 0 | 1 | 0 | 3 | 1 | 0 | 0 | 0 |
| Symbols:   ATRP5B, RPS5B   ribosomal protein 5B   chr2:15647883-15649042 REVERSE LENGTH=207                                                                         | AT2G37270.1 (+3) | 23 kDa  | 0 | 3 | 1 | 0 | 0 | 0 | 2 | 2 | 2 | 1 |
| Symbols:   Thioredoxin superfamily protein   chr3:3672189-3673937 FORWARD LENGTH=266                                                                                | AT3G11630.1      | 29 kDa  | 0 | 0 | 1 | 0 | 0 | 0 | 2 | 1 | 2 | 0 |
| Symbols:   PIP1B, TMP-A, ATHH2, PIP1.2   plasma membrane intrinsic protein 1B   chr2:18910450-18911703 FORWARD LENGTH=286                                           | AT2G45960.1 (+2) | 31 kDa  | 1 | 1 | 1 | 0 | 2 | 1 | 1 | 2 | 0 | 0 |
| Symbols:   RPL27A, RPL27AB   Ribosomal protein L18e/L15 superfamily protein   chr1:8263007-8263447 FORWARD LENGTH=146                                               | AT1G23290.1 (+1) | 16 kDa  | 1 | 1 | 1 | 0 | 1 | 2 | 1 | 2 | 1 | 0 |
| Symbols:   Ribosomal protein L18ae/LX family protein   chr2:14532916-14534161 REVERSE LENGTH=178                                                                    | AT2G34480.1      | 21 kDa  | 2 | 1 | 1 | 0 | 2 | 0 | 1 | 0 | 1 | 0 |
| Symbols:   Ribosomal protein L18ae/LX family protein   chr3:4910773-4911933 FORWARD LENGTH=178                                                                      | AT3G14600.1      | 21 kDa  | 0 | 0 | 0 | 0 | 1 | 0 | 0 | 0 | 0 | 0 |
| Symbols:   EMB2719, HAP15   PAM domain (PCI/PINT associated module) protein   chr1:7001409-7004154 REVERSE LENGTH=488                                               | AT1G20200.1      | 56 kDa  | 3 | 3 | 0 | 0 | 1 | 0 | 3 | 0 | 0 | 0 |
| Symbols:   PAM domain (PCI/PINT associated module) protein   chr1:28524623-28526718 REVERSE LENGTH=487                                                              | AT1G75990.1      | 56 kDa  | 3 | 0 | 0 | 0 | 1 | 0 | 3 | 0 | 0 | 0 |
| Symbols:   APS1   ATP sulfurylase 1   chr3:8112837-8114734 FORWARD LENGTH=463                                                                                       | AT3G22890.1      | 51 kDa  | 3 | 0 | 1 | 0 | 2 | 0 | 3 | 0 | 0 | 0 |
| Symbols:   APS2, ASA1   Pseudouridine synthase/archaeosine transglycosylase-like family protein   chr1:6914835-6916657 REVERSE LENGTH=476                           | AT1G19920.1      | 54 kDa  | 0 | 0 | 0 | 0 | 0 | 0 | 0 | 0 | 0 | 0 |
| Symbols:   APS3   Pseudouridine synthase/archaeosine transglycosylase-like family protein   chr4:8413443-8415311 REVERSE LENGTH=465                                 | AT4G14680.1      | 52 kDa  | 0 | 0 | 0 | 0 | 0 | 0 | 0 | 0 | 0 | 0 |
| Symbols:   Tetraatricopeptide repeat (TPR)-like superfamily protein   chr3:22565440-22566678 REVERSE LENGTH=412                                                     | AT3G60980.1      | 47 kDa  | 0 | 0 | 0 | 0 | 0 | 0 | 5 | 5 | 0 | 0 |
| Symbols:   SPA2   SPA1-related 2   chr4:6772163-6776675 FORWARD LENGTH=1036                                                                                         | AT4G11110.1      | 115 kDa | 5 | 6 | 0 | 0 | 0 | 0 | 0 | 0 | 0 | 0 |
| Symbols:   PORB   protchlorophyllide oxidoreductase B   chr4:13725648-13727107 FORWARD LENGTH=401                                                                   | AT4G27440.1 (+1) | 43 kDa  | 3 | 2 | 0 | 0 | 1 | 0 | 1 | 1 | 0 | 0 |
| Symbols:   ATPF   ATP synthase epsilon chain   chrC:52265-52663 REVERSE LENGTH=132                                                                                  | ATCG00470.1      | 14 kDa  | 2 | 2 | 0 | 1 | 0 | 1 | 1 | 2 | 0 | 0 |
| Symbols:   RPL14   ribosomal protein L14   chrC:80696-81064 REVERSE LENGTH=122                                                                                      | ATCG00780.1      | 14 kDa  | 2 | 2 | 0 | 1 | 0 | 2 | 1 | 2 | 0 | 0 |
| Symbols:   C2 calcium/lipid-binding plant phosphoribosyltransferase family protein   chr5:2127200-2129584 REVERSE LENGTH=794                                        | ATSG06850.1      | 91 kDa  | 0 | 0 | 0 | 0 | 2 | 0 | 5 | 0 | 0 | 0 |
| Symbols:   FDH   formate dehydrogenase   chr5:4777043-4779190 FORWARD LENGTH=384                                                                                    | ATSG14780.1      | 42 kDa  | 2 | 1 | 0 | 1 | 0 | 3 | 0 | 1 | 0 | 0 |
| Symbols:   TOC1, APRR1, PRR1, ATOC1   CCT motif-containing response regulator protein   chr5:24675540-24678176 FORWARD LENGTH=618                                   | ATSG61380.1      | 69 kDa  | 2 | 2 | 2 | 0 | 3 | 0 | 0 | 1 | 1 | 1 |
| Symbols:   ELP4-L2   ELP4-like 2   chr1:27344988-27345347 FORWARD LENGTH=119                                                                                        | AT1G72630.1      | 13 kDa  | 0 | 1 | 0 | 1 | 0 | 1 | 2 | 2 | 2 | 1 |
| Symbols:   STV1, RPL24B, RPL24   Ribosomal protein L24e family protein   chr3:19660749-19661912 REVERSE LENGTH=163                                                  | AT3G53020.1      | 19 kDa  | 2 | 2 | 0 | 1 | 0 | 1 | 2 | 2 | 0 | 0 |
| Symbols:   glycine-rich protein   chr4:11944050-11945565 REVERSE LENGTH=356                                                                                         | AT4G22740.1 (+1) | 39 kDa  | 2 | 2 | 0 | 0 | 0 | 2 | 1 | 0 | 0 | 0 |
| Symbols:   Ribosomal L28e protein family   chr2:8511752-8512995 FORWARD LENGTH=143                                                                                  | AT2G19730.1 (+2) | 16 kDa  | 1 | 1 | 0 | 0 | 0 | 0 | 0 | 2 | 0 | 0 |
| Symbols:   Ribosomal protein S11 family protein   chr2:15169925-15171159 FORWARD LENGTH=150                                                                         | AT2G36160.1      | 16 kDa  | 2 | 2 | 1 | 3 | 1 | 3 | 0 | 1 | 3 | 0 |
| Symbols:   Ribosomal protein S11 family protein   chr3:3623757-3624866 REVERSE LENGTH=150                                                                           | AT3G11510.1      | 16 kDa  | 1 | 2 | 1 | 2 | 1 | 2 | 2 | 0 | 0 | 0 |
| Symbols:   Coatomer, beta' subunit   chr3:5411699-5418313 REVERSE LENGTH=909                                                                                        | AT3G15980.1 (+3) | 102 kDa | 3 | 1 | 0 | 0 | 0 | 0 | 4 | 0 | 0 | 0 |
| Symbols:   structural molecules   chr1:30084522-30091949 FORWARD LENGTH=1135                                                                                        | AT1G79990.1 (+2) | 129 kDa | 2 | 0 | 0 | 0 | 0 | 2 | 0 | 0 | 0 | 0 |
| Symbols:   XIK, ATXK, XI-17   Myosin family protein with Dil domain   chr5:6927064-6936825 REVERSE LENGTH=1545                                                      | AT5G20490.1 (+1) | 175 kDa | 1 | 2 | 0 | 0 | 0 | 0 | 0 | 0 | 0 | 0 |
| Symbols:   MYA1, ATMYA1, XI-1   myosin 1   chr1:6039453-6049309 FORWARD LENGTH=1520                                                                                 | AT1G17580.1      | 173 kDa | 1 | 1 | 0 | 0 | 0 | 0 | 0 | 0 | 0 | 0 |
| Symbols:   XIC, ATXIC   Myosin family protein with Dil domain   chr1:2779963-2788325 FORWARD LENGTH=1538                                                            | AT1G08730.1      | 175 kDa | 0 | 1 | 0 | 0 | 0 | 0 | 0 | 0 | 0 | 0 |
| Symbols:   HSP81-2, ERD8, HSP90.2, ATHsp90.2   heat shock protein 81-2   chr5:22686923-22689433 FORWARD LENGTH=699                                                  | AT5G56030.1 (+1) | 80 kDa  | 3 | 2 | 0 | 1 | 0 | 1 | 1 | 1 | 0 | 0 |
| Symbols:   PIP3, PIP3A, PIP2.7, SIMP1   plasma membrane intrinsic protein 3   chr4:16708672-16709958 FORWARD LENGTH=280                                             | AT4G31001.1 (+1) | 30 kDa  | 3 | 3 | 1 | 2 | 1 | 0 | 2 | 0 | 0 | 0 |
| Symbols:   RPS4   chloroplast ribosomal protein S4   chrC:45223-45828 REVERSE LENGTH=201                                                                            | ATCG00380.1      | 23 kDa  | 1 | 1 | 0 | 0 | 0 | 0 | 2 | 2 | 0 | 0 |
| Symbols:   LOS2, ENO2   Enolase   chr2:15321081-15323786 REVERSE LENGTH=444                                                                                         | AT2G36530.1      | 48 kDa  | 1 | 1 | 0 | 1 | 0 | 0 | 2 | 1 | 1 | 0 |
| Symbols:   ATPase, V0/AD complex, subunit C/D   chr3:10778025-10780350 FORWARD LENGTH=351                                                                           | AT3G28715.1      | 41 kDa  | 2 | 1 | 0 | 1 | 0 | 1 | 1 | 0 | 0 | 0 |
| Symbols:   ATPase, V0/AD complex, subunit C/D   chr3:10773144-10775594 REVERSE LENGTH=351                                                                           | AT3G28710.1      | 41 kDa  | 1 | 1 | 0 | 2 | 0 | 2 | 0 | 0 | 0 | 0 |
| Symbols:   cpHsc70-1   chloroplast heat shock protein 70-1   chr4:12590094-12593437 FORWARD LENGTH=718                                                              | AT4G24280.1      | 77 kDa  | 0 | 0 | 0 | 2 | 0 | 5 | 1 | 0 | 0 | 0 |
| Symbols:   CPHsc70-2EAT SHOCK PROTEIN 70-2, HSC70-7, cpHsc70-2   chloroplast heat shock protein 70-2   chr5:20330470-2036295 FORWARD LENGTH=718                     | AT5G49910.1      | 77 kDa  | 0 | 0 | 0 | 3 | 0 | 4 | 1 | 0 | 0 | 0 |
| Symbols:   LUH   LEUNIG homolog   chr2:13867235-13871844 FORWARD LENGTH=787                                                                                         | AT2G32700.1 (+6) | 86 kDa  | 0 | 0 | 0 | 1 | 0 | 0 | 3 | 0 | 0 | 0 |
| Symbols:   emb1138   DEAD box RNA helicase (RH3)   chr5:9285540-9288871 REVERSE LENGTH=747                                                                          | AT5G26742.1 (+1) | 81 kDa  | 3 | 2 | 0 | 0 | 1 | 0 | 0 | 0 | 0 | 0 |
| Symbols:   RPS11   ribosomal protein S11   chrC:78960-79376 REVERSE LENGTH=138                                                                                      | ATCG00750.1      | 15 kDa  | 2 | 2 | 0 | 1 | 0 | 1 | 2 | 2 | 0 | 0 |
| Symbols:   Ribosomal protein S4 (RPS4A) family protein   chr2:7546598-7548138 FORWARD LENGTH=261                                                                    | AT2G17360.1 (+3) | 30 kDa  | 2 | 0 | 1 | 1 | 0 | 1 | 1 | 1 | 0 | 0 |
| Symbols:   PFL, RPS18A, PFL1   Ribosomal protein S13/S18 family   chr1:8067990-8069163 FORWARD LENGTH=152                                                           | AT1G22780.1 (+2) | 18 kDa  | 0 | 1 | 1 | 1 | 0 | 1 | 0 | 1 | 1 | 0 |
| Symbols:   P40, AP40, RP40, RPSAA   40s ribosomal protein SA   chr1:27243148-27244842 REVERSE LENGTH=298                                                            | AT1G72370.1 (+1) | 32 kDa  | 1 | 3 | 0 | 2 | 0 | 2 | 0 | 1 | 0 | 0 |
| Symbols:   RPSAB   40s ribosomal protein SA B   chr3:1309544-1310846 REVERSE LENGTH=280                                                                             | AT3G04770.2      | 31 kDa  | 0 | 0 | 0 | 1 | 0 | 0 | 0 | 0 | 0 | 0 |
| Symbols:   CLPC, ATHSP93-V, HSP93-V, DCA1, CLPC1   CLPC homologue 1   chr5:20715710-20719800 REVERSE LENGTH=929                                                     | AT5G50920.1      | ?       | 4 | 2 | 0 | 0 | 0 | 0 | 0 | 0 | 0 | 0 |
| Symbols:   ATCLPC, ATHSP93-III, HSP93-III   Clp ATPase   chr3:18122363-18126008 REVERSE LENGTH=952                                                                  | AT3G48870.1 (+1) | 106 kDa | 3 | 2 | 0 | 0 | 0 | 0 | 0 | 0 | 0 | 0 |
| Symbols:   SPA4   SPA1-related 4   chr1:19783748-19786690 FORWARD LENGTH=794                                                                                        | AT1G53090.1 (+1) | 89 kDa  | 3 | 6 | 0 | 0 | 0 | 0 | 0 | 0 | 0 | 0 |
| Symbols:   AAA-type ATPase family protein   chr2:8692736-8694837 FORWARD LENGTH=443                                                                                 | AT2G20140.1 (+1) | 49 kDa  | 1 | 5 | 3 | 0 | 0 | 0 | 0 | 0 | 0 | 0 |
| Symbols:   RPT6A, ATSGUG1   regulatory particle triple-A ATPase 6A   chr5:6752144-6754918 FORWARD LENGTH=419                                                        | AT5G19990.1 (+1) | 47 kDa  | 1 | 1 | 0 | 0 | 1 | 0 | 2 | 1 | 0 | 0 |
| Symbols:   Lactate/malate dehydrogenase family protein   chr1:1189418-1191267 REVERSE LENGTH=332                                                                    | AT1G04410.1      | 36 kDa  | 0 | 0 | 2 | 0 | 0 | 1 | 0 | 0 | 0 | 0 |
| Symbols:   Aldolase superfamily protein   chr3:19627383-19628874 REVERSE LENGTH=358                                                                                 | AT3G52930.1      | 39 kDa  | 0 | 1 | 0 | 1 | 0 | 1 | 0 | 0 | 1 | 0 |
| Symbols:   Aldolase superfamily protein   chr5:963389-964982 REVERSE LENGTH=359                                                                                     | AT5G03690.2      | 39 kDa  | 0 | 0 | 0 | 0 | 1 | 0 | 0 | 0 | 0 | 0 |
| Symbols:   Aldolase superfamily protein   chr4:13391566-13392937 FORWARD LENGTH=358                                                                                 | AT4G26530.1 (+1) | 38 kDa  | 0 | 0 | 0 | 0 | 0 | 0 | 0 | 0 | 0 | 0 |
| Symbols:   CHL11, CH42, CH-42, CHL11, CHL1-1   P-loop containing nucleoside triphosphate hydrolases superfamily protein   chr4:10201897-10203361 REVERSE LENGTH=424 | AT4G18480.1      | 46 kDa  | 2 | 1 | 0 | 0 | 0 | 0 | 2 | 0 | 0 | 0 |
| Symbols:   CHL12, CHL12, CHL1-2   magnesium chelatase i2   chr5:18628095-18629565 FORWARD LENGTH=418                                                                | AT5G45930.1      | 46 kDa  | 2 | 0 | 0 | 0 | 0 | 0 | 0 | 0 | 0 | 0 |
| Symbols:   transducin family protein / WD-40 repeat family protein   chr3:23431009-23437241 REVERSE LENGTH=1104                                                     | AT3G63460.1 (+2) | 120 kDa | 1 | 1 | 0 | 0 | 1 | 0 | 2 | 0 | 0 | 0 |
| Symbols:   vacuolar ATP synthase subunit H family protein   chr3:14228846-14232228 REVERSE LENGTH=441                                                               | AT3G42050.1      | 50 kDa  | 2 | 1 | 0 | 1 | 0 | 1 | 0 | 0 | 0 | 0 |
| Symbols:   RPL18   ribosomal protein L18   chr3:1621511-1622775 FORWARD LENGTH=187                                                                                  | AT3G05590.1 (+1) | 21 kDa  | 2 | 1 | 1 | 1 | 0 | 2 | 1 | 1 | 0 | 0 |
| Symbols:   RPT5A, ATS6A.2   regulatory particle triple-A ATPase 5A   chr3:1603540-1605993 FORWARD LENGTH=424                                                        | AT3G05530.1      | 47 kDa  | 3 | 2 | 0 | 0 | 0 | 1 | 2 | 2 | 0 | 0 |
| Symbols:   AGT, AGT1, SGAT   alanine:glyoxylate aminotransferase   chr2:5539417-5540902 REVERSE LENGTH=401                                                          | AT2G13360.1 (+1) | 44 kDa  | 1 | 1 | 1 | 0 | 1 | 0 | 1 | 2 | 0 | 0 |
| Symbols:   Ribosomal protein L22p/L17e family protein   chr1:9515230-9516725 FORWARD LENGTH=176                                                                     | AT1G27400.1 (+1) | 20 kDa  | 0 | 0 | 1 | 2 | 0 | 0 | 0 | 0 | 0 | 0 |
| Symbols:   VHA-A   vacuolar ATP synthase subunit A   chr1:29660463-29664575 FORWARD LENGTH=623                                                                      | AT1G78900.1 (+1) | 69 kDa  | 1 | 0 | 0 | 0 | 0 | 2 | 0 | 0 | 0 | 0 |
| Symbols:   RPT1A   regulatory particle triple-A 1A   chr1:20065921-20068324 REVERSE LENGTH=426                                                                      | AT1G53750.1      | 48 kDa  | 2 | 1 | 0 | 1 | 0 | 0 | 0 | 0 | 0 | 0 |
| Symbols:   ATJ2, J2   DNAJ homologue 2   chr5:7303798-7305668 REVERSE LENGTH=419                                                                                    | AT5G22060.1      | 46 kDa  | 2 | 2 | 0 | 0 | 0 | 0 | 2 | 0 | 0 | 0 |
| Symbols:   ATJ3, ATJ   DNAJ homologue 3   chr3:15869115-15871059 REVERSE LENGTH=420                                                                                 | AT3G41110.1 (+1) | 46 kDa  | 2 | 2 | 0 | 0 | 0 | 0 | 1 | 0 | 0 | 0 |
| Symbols:   RPS1, ARRP51   ribosomal protein S1   chr5:11619262-11621223 REVERSE LENGTH=416                                                                          | AT5G30510.1      | 45 kDa  | 1 | 0 | 0 | 3 | 0 | 0 | 4 | 0 | 0 | 0 |
| Symbols:   ACCD   acetyl-CoA carboxylase carboxyl transferase subunit beta   chrC:57075-58541 FORWARD LENGTH=488                                                    | ATCG00500.1      | 56 kDa  | 2 | 1 | 0 | 0 | 0 | 0 | 0 | 0 | 0 | 0 |
| Symbols:   RPS8   ribosomal protein S8   chrC:80068-80472 REVERSE LENGTH=134                                                                                        | ATCG00770.1      | 15 kDa  | 1 | 2 | 0 | 1 | 0 | 1 | 1 | 1 | 0 | 0 |
| Symbols:   SSR16   small subunit ribosomal protein 16   chr4:16535084-16536092 REVERSE LENGTH=113                                                                   | AT4G34620.1      | 13 kDa  | 1 | 1 | 0 | 1 | 0 | 1 | 1 | 1 | 2 | 0 |
| Symbols:   Sucrose-6P-phosphate phosphohydrolase family protein   chr2:15053952-15055776 FORWARD LENGTH=422                                                         | AT2G35840.1 (+2) | 48 kDa  | 1 | 0 | 0 | 0 | 0 | 2 | 0 | 0 | 0 | 0 |
| Symbols:   GTP binding Elongation factor Tu family protein   chr4:1295751-1298354 REVERSE LENGTH=454                                                                | AT4G02930.1      | 49 kDa  | 3 | 0 | 0 | 1 | 0 | 0 | 0 | 0 | 0 | 0 |
| Symbols:   ECT2   evolutionarily conserved C-terminal region 2   chr4:438574-4388220 REVERSE LENGTH=667                                                             | AT3G13460.1 (+3) | 72 kDa  | 3 | 2 | 0 | 0 | 0 | 0 | 0 | 0 | 0 | 0 |
| Symbols:   Glycine cleavage T-protein family   chr1:4001801-4003245 FORWARD LENGTH=408                                                                              | AT1G11860.1 (+2) | 44 kDa  | 1 | 1 | 0 | 1 | 0 | 1 | 0 | 2 | 0 | 0 |
| Symbols:   NOP56   homolog of nuclear protein NOP56   chr1:20984544-20986993 REVERSE LENGTH=522                                                                     | AT1G56110.1      | 59 kDa  | 1 | 0 | 0 | 0 | 0 | 0 | 2 | 0 | 0 | 0 |
| Symbols:   RPS15A   ribosomal protein S15A   chr1:2408413-2409065 REVERSE LENGTH=130                                                                                | AT1G07770.1 (+2) | 15 kDa  | 1 | 1 | 1 | 0 | 0 | 1 | 3 | 0 | 0 | 0 |
| Symbols:   Ribosomal protein S8 family protein   chr2:16517588-16518265 REVERSE LENGTH=136                                                                          | AT2G39590.1      | 15 kDa  | 0 | 0 | 0 | 0 | 0 | 0 | 0 | 0 | 0 | 0 |
| Symbols:   RPN1A, ATRPN1A   26S proteasome regulatory subunit S2 1A   chr2:8859211-8864699 FORWARD LENGTH=891                                                       | AT2G20580.1      | ?       | 2 | 1 | 0 | 0 | 0 | 0 | 0 | 0 | 0 | 0 |
| Symbols:   PAC1   20S proteasome alpha subunit C1   chr3:7792819-                                                                                                   |                  |         |   |   |   |   |   |   |   |   |   |   |

|                                                                                                                                                |                  |         |   |   |   |   |   |   |   |   |   |   |
|------------------------------------------------------------------------------------------------------------------------------------------------|------------------|---------|---|---|---|---|---|---|---|---|---|---|
| Symbols: RPL16   ribosomal protein L16   chrC:81189-82652 REVERSE LENGTH=135                                                                   | ATCG00790.1      | 15 kDa  | 1 | 0 | 0 | 1 | 0 | 2 | 0 | 0 | 0 | 0 |
| Symbols: PUB12, ATPUB12   PLANT U-BOX 12   chr2:12367001-12370608 REVERSE LENGTH=962                                                           | AT2G28830.1      | 107 kDa | 1 | 0 | 0 | 1 | 0 | 1 | 0 | 0 | 0 | 0 |
| Symbols:   NAD(P)-binding Rossmann-fold superfamily protein   chr3:11193767-11194948 REVERSE LENGTH=298                                        | AT3G29250.1      | 32 kDa  | 0 | 0 | 0 | 1 | 0 | 0 | 0 | 0 | 0 | 0 |
| Symbols: ILA   ILITYHIA   chr1:24065232-24081908 REVERSE LENGTH=2610                                                                           | AT1G64790.1 (+1) | 285 kDa | 3 | 0 | 0 | 0 | 0 | 0 | 0 | 0 | 0 | 0 |
| Symbols: APUM5, PUM5   pumilio 5   chr3:7059098-7062660 REVERSE LENGTH=961                                                                     | AT3G20250.1      | 107 kDa | 3 | 1 | 0 | 1 | 0 | 0 | 0 | 0 | 0 | 0 |
| Symbols: ATTP57, TP57, ATTP5A   trehalose-phosphatase/synthase 7   chr1:1955413-1958153 FORWARD LENGTH=851                                     | AT1G06410.1      | 97 kDa  | 1 | 0 | 0 | 0 | 0 | 3 | 0 | 0 | 0 | 0 |
| Symbols:   transcription regulators   chr1:373335-386682 FORWARD LENGTH=2431                                                                   | AT1G02080.1 (+1) | 270 kDa | 2 | 1 | 0 | 0 | 0 | 0 | 0 | 0 | 0 | 0 |
| Symbols: ATGSTF9, GLUTTR, ATGSTF7, GSTF9   glutathione S-transferase PH19   chr2:13139132-13140057 FORWARD LENGTH=215                          | AT2G30860.1 (+1) | 24 kDa  | 0 | 2 | 0 | 1 | 0 | 0 | 0 | 0 | 0 | 0 |
| Symbols:   Ribosomal protein L35Ae family protein   chr1:27928415-27929466 REVERSE LENGTH=112                                                  | AT1G74270.1      | 13 kDa  | 1 | 0 | 0 | 2 | 0 | 1 | 0 | 0 | 0 | 0 |
| Symbols: ATU2AF35B, U2AF35B   Zinc finger C-x8-C-x5-C-x3-H type family protein   chr5:17170445-17171296 REVERSE LENGTH=283                     | AT5G42820.1 (+1) | 33 kDa  | 2 | 0 | 0 | 1 | 0 | 1 | 0 | 0 | 0 | 0 |
| Symbols: ATU2AF35A   U2 snRNP auxiliary factor small subunit, putative   chr1:9615302-9616042 FORWARD LENGTH=246                               | AT1G27650.2      | 29 kDa  | 0 | 0 | 0 | 1 | 0 | 1 | 0 | 0 | 0 | 0 |
| Symbols:   Zinc finger C-x8-C-x5-C-x3-H type family protein   chr3:16328221-16328448 REVERSE LENGTH=75                                         | AT3G44785.1      | 9 kDa   | 0 | 0 | 0 | 0 | 0 | 0 | 0 | 0 | 0 | 0 |
| Symbols: PIF5, PIF5   phytochrome interacting factor 3-like 6   chr3:21828189-21829895 REVERSE LENGTH=442                                      | AT3G59060.1 (+3) | 49 kDa  | 0 | 0 | 1 | 0 | 0 | 2 | 0 | 0 | 0 | 0 |
| Symbols: PIF4, SRL2, ATPIF4   phytochrome interacting factor 4   chr2:17887003-17888823 FORWARD LENGTH=430                                     | AT2G43010.1 (+1) | 48 kDa  | 0 | 0 | 1 | 0 | 0 | 1 | 0 | 0 | 0 | 0 |
| Symbols:   Ribosomal protein L31e family protein   chr2:8513577-8514346 FORWARD LENGTH=119                                                     | AT2G19740.1 (+2) | 14 kDa  | 0 | 0 | 0 | 2 | 0 | 2 | 0 | 0 | 0 | 0 |
| Symbols:   Ribosomal protein L31e family protein   chr5:22944003-22944767 REVERSE LENGTH=85                                                    | AT5G56710.2      | 10 kDa  | 0 | 0 | 0 | 1 | 0 | 1 | 0 | 0 | 0 | 0 |
| Symbols:   Coatomer epsilon subunit   chr1:10858546-10860173 REVERSE LENGTH=292                                                                | AT1G30630.1      | 33 kDa  | 0 | 0 | 0 | 2 | 0 | 2 | 0 | 0 | 0 | 0 |
| Symbols: SHM4   serine hydroxymethyltransferase 4   chr4:8048013-8050021 REVERSE LENGTH=471                                                    | AT4G19930.1      | 52 kDa  | 2 | 1 | 0 | 0 | 0 | 0 | 0 | 0 | 0 | 0 |
| Symbols: RPL22   ribosomal protein L22   chrC:83467-83949 REVERSE LENGTH=160                                                                   | ATCG00810.1      | 19 kDa  | 0 | 0 | 0 | 1 | 0 | 2 | 0 | 0 | 0 | 0 |
| Symbols: PBE1   20S proteasome beta subunit E1   chr1:4452644-4454663 FORWARD LENGTH=274                                                       | AT1G13060.1 (+2) | 30 kDa  | 0 | 2 | 0 | 0 | 0 | 0 | 0 | 0 | 0 | 0 |
| Symbols: PSB8   photosystem II reaction center protein B   chrC:72371-73897 FORWARD LENGTH=508                                                 | ATCG00680.1      | 56 kDa  | 1 | 1 | 0 | 0 | 0 | 2 | 0 | 0 | 0 | 0 |
| Symbols: NRPB1, RPB1, RNA_POL_II_LSRNA_POL_II_L5, RNA_POL_II_L5   RNA polymerase II large subunit   chr4:16961115-16967892 REVERSE LENGTH=1839 | AT4G38000.1      | 205 kDa | 2 | 0 | 0 | 0 | 0 | 0 | 0 | 0 | 0 | 0 |
| Symbols: EMB2761   threonyl-tRNA synthetase, putative   threonine-tRNA ligase, putative   chr2:1698466-1701271 REVERSE LENGTH=650              | AT2G04842.1      | 75 kDa  | 0 | 0 | 0 | 0 | 2 | 0 | 0 | 0 | 0 | 0 |
| Symbols: ELF4_L4   ELF4-like 4   chr1:5997932-5998276 FORWARD LENGTH=114                                                                       | AT1G17455.1 (+1) | 13 kDa  | 0 | 0 | 0 | 0 | 0 | 2 | 2 | 2 | 1 | 0 |
| Symbols:   AAA-type ATPase family protein   chr1:17009220-17011607 FORWARD LENGTH=399                                                          | AT1G45000.1 (+2) | 45 kDa  | 2 | 2 | 0 | 0 | 0 | 2 | 0 | 0 | 0 | 0 |
| Symbols: PHO71, NPH1, JK22a, RPT1   phototropin 1   chr3:16818557-16823860 FORWARD LENGTH=996                                                  | AT3G45780.1 (+1) | 112 kDa | 2 | 0 | 0 | 0 | 0 | 1 | 0 | 0 | 0 | 0 |
| Symbols: PHO72, NPH1   phototropin 2   chr5:23524771-23529993 FORWARD LENGTH=915                                                               | AT5G58140.1 (+3) | 102 kDa | 0 | 0 | 0 | 0 | 0 | 0 | 0 | 0 | 0 | 0 |
| Symbols: ZFN1   zinc finger protein 1   chr3:614075-615916 FORWARD LENGTH=397                                                                  | AT3G02830.1      | 44 kDa  | 2 | 0 | 0 | 0 | 0 | 0 | 0 | 0 | 0 | 0 |
| Symbols:   Ribosomal protein L35Ae family protein   chr1:15651585-15652427 REVERSE LENGTH=111                                                  | AT1G41880.1      | 13 kDa  | 0 | 0 | 0 | 2 | 0 | 1 | 0 | 0 | 0 | 0 |
| Symbols: SPA3   SPA1-related 3   chr3:5169327-5172480 REVERSE LENGTH=837                                                                       | AT3G15354.1      | 93 kDa  | 1 | 2 | 0 | 0 | 0 | 0 | 0 | 0 | 0 | 0 |
| Symbols: PRP39   Tetratricopeptide repeat (TPR)-like superfamily protein   chr1:1051803-1056550 FORWARD LENGTH=768                             | AT1G04080.1 (+1) | 85 kDa  | 2 | 0 | 0 | 0 | 0 | 0 | 0 | 0 | 0 | 0 |
| Symbols: ABA1, LOS6, NPQ2, ATABA1, ZEP, IBS3, ATZEP   zeaxanthin epoxidase (ZEP) (ABA1)   chr5:26753745-26757090 REVERSE LENGTH=667            | AT5G67030.1 (+1) | 74 kDa  | 2 | 0 | 0 | 0 | 0 | 0 | 0 | 0 | 0 | 0 |

#### Percent Coverage

| Identified Proteins (283)                                                                                                     | Accession Number | Molecular Weight | AtELF3-1 | AtELF3-2 | SvELF3#2 rep1 | SvELF3#2 rep2 | SvELF3#3 rep1 | SvELF3#3 rep2 | BdELF3#2 rep1 | BdELF3#2 rep2 | BdELF3#3 rep1 | BdELF3#3 rep2 |
|-------------------------------------------------------------------------------------------------------------------------------|------------------|------------------|----------|----------|---------------|---------------|---------------|---------------|---------------|---------------|---------------|---------------|
| Symbols: PHYB, HY3, OOP1   phytochrome B   chr2:8140079-8144151 FORWARD LENGTH=1172                                           | AT2G18790.1      | 129 kDa          | 36.80%   | 37.40%   | 54.20%        | 42.20%        | 49.60%        | 45.00%        | 33.70%        | 32.90%        | 39.80%        | 37.30%        |
| Symbols: PHYD   phytochrome D   chr4:9195602-9199486 REVERSE LENGTH=1164                                                      | AT4G16250.1      | 129 kDa          | 10.10%   | 11.00%   | 11.90%        | 11.70%        | 14.70%        | 11.90%        | 11.10%        | 10.10%        | 13.60%        | 11.80%        |
| Symbols: HSC70-1, HSP70-1, AT-HSC70-1, HSC70   heat shock cognate protein 70-1   chr5:554055-556334 REVERSE LENGTH=651        | AT5G02500.1      | 71 kDa           | 36.10%   | 28.40%   | 55.60%        | 51.00%        | 53.80%        | 58.70%        | 28.40%        | 28.10%        | 16.70%        | 22.60%        |
| Symbols:   Heat shock protein 70 (Hsp 70) family protein   chr3:2903434-2905632 REVERSE LENGTH=649                            | AT3G09440.1 (+1) | 71 kDa           | 37.30%   | 33.60%   | 49.90%        | 44.40%        | 51.00%        | 47.80%        | 33.60%        | 31.70%        | 12.80%        | 24.50%        |
| Symbols: HSP70, ATHSP70   heat shock protein 70   chr3:3991487-3993689 REVERSE LENGTH=650                                     | AT3G12580.1      | 71 kDa           | 27.80%   | 20.80%   | 31.20%        | 36.90%        | 37.50%        | 41.70%        | 22.60%        | 22.30%        | 8.77%         | 15.10%        |
| Symbols:   Heat shock protein 70 (Hsp 70) family protein   chr5:550296-552565 REVERSE LENGTH=653                              | AT5G02490.1      | 71 kDa           | 31.70%   | 24.50%   | 29.60%        | 28.20%        | 31.40%        | 39.20%        | 22.70%        | 20.80%        | 8.73%         | 15.00%        |
| Symbols: Hsp70b   heat shock protein 70b   chr1:5502386-5504326 REVERSE LENGTH=646                                            | AT1G16030.1      | 71 kDa           | 0        | 0        | 0             | 0             | 0             | 0             | 0             | 0             | 0             | 0             |
| Symbols: BdELF3_HFC                                                                                                           | ATMGcustom02     | 86 kDa           | 2.38%    | 0        | 1.00%         | 0.00%         | 1.00%         | 0.00%         | 41.70%        | 42.70%        | 35.30%        | 33.10%        |
| Symbols: PHYC   phytochrome C   chr5:14008049-14011619 FORWARD LENGTH=1111                                                    | AT5G35840.1      | 124 kDa          | 29.40%   | 28.90%   | 37.40%        | 38.70%        | 37.10%        | 42.10%        | 24.10%        | 22.00%        | 22.70%        | 26.80%        |
| Symbols: SvELF3_HFC                                                                                                           | ATMGcustom01     | 87 kDa           | 2.38%    | 0        | 40.20%        | 48.00%        | 42.40%        | 54.40%        | 1.00%         | 1.00%         | 1.00%         | 2.38%         |
| Symbols: AtELF3_HFC                                                                                                           | ATMGcustom03     | 84 kDa           | 35.80%   | 31.40%   | 0             | 0             | 0             | 0             | 0.00%         | 0             | 0             | 2.51%         |
| Symbols: TZP   zinc knuckle (CCHC-type) family protein   chr5:17527261-17530207 FORWARD LENGTH=831                            | AT5G43630.1      | 91 kDa           | 21.40%   | 17.00%   | 22.50%        | 32.50%        | 22.00%        | 36.10%        | 17.80%        | 19.30%        | 20.20%        | 21.70%        |
| Symbols: RBCL   ribulose-bisphosphate carboxylases   chrC:54958-56397 FORWARD LENGTH=479                                      | ATCG00490.1      | 53 kDa           | 32.20%   | 30.10%   | 39.20%        | 34.20%        | 29.00%        | 46.10%        | 32.20%        | 21.50%        | 22.80%        | 0             |
| Symbols: PHYE   phytochrome E   chr4:10042312-10045948 REVERSE LENGTH=1112                                                    | AT4G18130.1      | 123 kDa          | 16.00%   | 26.60%   | 18.30%        | 23.20%        | 18.50%        | 23.50%        | 7.46%         | 14.10%        | 19.20%        | 18.40%        |
| Symbols: TUB2   tubulin beta chain 2   chr5:25181560-25183501 FORWARD LENGTH=450                                              | AT5G62690.1 (+1) | 51 kDa           | 31.10%   | 27.10%   | 9.78%         | 23.10%        | 12.90%        | 28.90%        | 20.70%        | 16.90%        | 13.30%        | 11.10%        |
| Symbols: TUB5   tubulin beta-5 chain   chr1:6938033-6940481 REVERSE LENGTH=449                                                | AT1G20010.1      | 50 kDa           | 25.60%   | 20.90%   | 0             | 21.60%        | 0             | 27.60%        | 20.90%        | 10.20%        | 7.57%         | 5.35%         |
| Symbols: TUB6   beta-6 tubulin   chr5:3961317-3962971 REVERSE LENGTH=449                                                      | AT5G12250.1      | 51 kDa           | 20.70%   | 18.30%   | 0             | 14.30%        | 0             | 20.30%        | 18.30%        | 10.20%        | 7.57%         | 5.35%         |
| Symbols: TUB9   tubulin beta-9 chain   chr4:11182218-11183840 FORWARD LENGTH=444                                              | AT4G02890.1      | 50 kDa           | 28.40%   | 24.30%   | 0             | 20.90%        | 7.21%         | 23.20%        | 15.80%        | 10.40%        | 7.66%         | 5.41%         |
| Symbols: TUB7   tubulin beta-7 chain   chr2:12644258-12645932 REVERSE LENGTH=449                                              | AT2G29550.1      | 51 kDa           | 27.40%   | 23.40%   | 0             | 16.70%        | 12.90%        | 26.30%        | 18.30%        | 16.00%        | 7.57%         | 5.35%         |
| Symbols: TUB4   tubulin beta chain 4   chr5:17859442-17860994 REVERSE LENGTH=444                                              | AT5G44340.1      | 50 kDa           | 28.40%   | 24.30%   | 0             | 18.20%        | 7.21%         | 26.60%        | 18.50%        | 10.40%        | 7.66%         | 5.41%         |
| Symbols: TUB8   tubulin beta 8   chr5:8042962-8044528 FORWARD LENGTH=449                                                      | AT5G23860.1 (+1) | 51 kDa           | 28.70%   | 24.70%   | 0             | 20.50%        | 12.90%        | 20.30%        | 18.30%        | 16.00%        | 7.57%         | 0             |
| Symbols: PCH1   F-box family protein   chr2:7074940-7079181 FORWARD LENGTH=778                                                | AT2G16365.1 (+2) | 89 kDa           | 14.90%   | 14.90%   | 17.50%        | 25.10%        | 21.00%        | 28.70%        | 15.40%        | 16.60%        | 18.60%        | 18.60%        |
| Symbols: GAPC-2, GAPC2   glyceraldehyde-3-phosphate dehydrogenase C2   chr1:4608465-4610494 REVERSE LENGTH=338                | AT1G13440.1      | 37 kDa           | 37.30%   | 31.70%   | 22.50%        | 58.60%        | 34.90%        | 52.70%        | 20.70%        | 15.40%        | 16.60%        | 10.40%        |
| Symbols: GAPC, GAPC-1, GAPC1   glyceraldehyde-3-phosphate dehydrogenase C subunit 1   chr3:1081077-1083131 FORWARD LENGTH=338 | AT3G04120.1      | 37 kDa           | 37.30%   | 31.70%   | 22.50%        | 58.60%        | 34.90%        | 52.70%        | 20.70%        | 12.70%        | 27.20%        | 10.40%        |
| Symbols: ATPA   ATP synthase subunit alpha   chrC:9938-11461 REVERSE LENGTH=507                                               | ATCG00120.1      | 55 kDa           | 31.60%   | 20.90%   | 2.37%         | 26.60%        | 0             | 35.70%        | 22.70%        | 20.90%        | 18.30%        | 9.86%         |
| Symbols: TUA4, TOR2   tubulin alpha-4 chain   chr1:1356421-1358266 REVERSE LENGTH=450                                         | AT1G04820.1 (+1) | 50 kDa           | 20.20%   | 21.30%   | 18.70%        | 32.90%        | 21.30%        | 35.60%        | 8.44%         | 16.90%        | 6.44%         | 4.44%         |
| Symbols: TUA3   tubulin alpha-3   chr5:6682761-6684474 REVERSE LENGTH=450                                                     | AT5G19770.1 (+1) | 50 kDa           | 11.10%   | 10.90%   | 11.10%        | 20.70%        | 9.11%         | 26.40%        | 4.00%         | 12.70%        | 2.00%         | 0             |
| Symbols: TUA6   Tubulin/Tts2 family protein   chr4:8548753-8550319 REVERSE LENGTH=427                                         | AT4G14960.1      | 47 kDa           | 21.30%   | 19.20%   | 16.40%        | 31.40%        | 19.20%        | 32.30%        | 8.90%         | 21.10%        | 6.79%         | 4.68%         |
| Symbols: ACT8   actin 8   chr1:18216539-18217947 FORWARD LENGTH=377                                                           | AT1G49240.1 (+1) | 42 kDa           | 12.50%   | 12.50%   | 9.02%         | 18.30%        | 11.90%        | 15.10%        | 12.50%        | 12.50%        | 12.50%        | 12.50%        |
| Symbols: ACT7   actin 7   chr5:3052809-3054220 FORWARD LENGTH=377                                                             | AT5G09810.1      | 42 kDa           | 16.70%   | 16.70%   | 4.24%         | 22.50%        | 16.20%        | 22.30%        | 16.70%        | 12.50%        | 9.02%         | 4.24%         |
| Symbols: ACT1, AAC1   actin 1   chr2:15779761-15781241 FORWARD LENGTH=377                                                     | AT2G37620.1 (+2) | 42 kDa           | 4.24%    | 0.00%    | 0             | 12.70%        | 2.92%         | 5.57%         | 0.00%         | 0             | 0             | 0             |
| Symbols: ACT4   actin 4   chr5:23950109-23951586 FORWARD LENGTH=377                                                           | AT5G59370.1 (+1) | 42 kDa           | 0        | 0        | 0             | 13.30%        | 0             | 10.30%        | 4.77%         | 4.77%         | 4.77%         | 0             |
| Symbols:   Actin family protein   chr2:17578683-17580222 FORWARD LENGTH=329                                                   | AT2G42170.1      | 37 kDa           | 5.47%    | 5.47%    | 6.99%         | 5.47%         | 5.47%         | 5.47%         | 5.47%         | 5.47%         | 5.47%         | 0             |
| Symbols:   Actin-like ATPase superfamily protein   chr2:17560211-17561945 FORWARD LENGTH=378                                  | AT2G42100.1      | 42 kDa           | 0        | 0        | 0             | 0             | 0             | 0             | 0             | 0             | 0             | 0             |
| Symbols: ATRAB8D, ATRABE1B, RABE1b   RAB GTPase homolog E1B   chr4:10990036-10991466 FORWARD LENGTH=476                       | AT4G20360.1      | 52 kDa           | 17.60%   | 14.10%   | 32.10%        | 34.70%        | 30.50%        | 40.50%        | 14.10%        | 11.60%        | 9.03%         | 9.03%         |
| Symbols:   Ribosomal protein S5 family protein   chr2:17460016-17461398 REVERSE LENGTH=285                                    | AT2G41840.1      | 31 kDa           | 23.90%   | 28.40%   | 9.12%         | 14.00%        | 15.10%        | 20.00%        | 23.90%        | 23.90%        | 10.50%        | 5.26%         |
| Symbols: XW6   Ribosomal protein S5 family protein   chr1:21689115-21690085 FORWARD LENGTH=284                                | AT1G59380.1 (+3) | 31 kDa           | 27.80%   | 23.60%   | 13.40%        | 9.51%         | 23.90%        | 24.30%        | 14.10%        | 14.10%        | 5.28%         | 0.00%         |
| Symbols:   Ribosomal protein S5 family protein   chr3:21279824-21280887 REVERSE LENGTH=276                                    | AT3G57490.1      | 30 kDa           | 12.70%   | 0        | 0             | 0             | 0             | 0             | 0             | 0             | 0             | 0             |
| Symbols: TIC   time for coffee   chr3:7913181-7918967 FORWARD LENGTH=1555                                                     | AT3G22380.2      | 165 kDa          | 5.47%    | 5.47%    | 4.18%         | 12.20%        | 2.96%         | 15.30%        | 4.05%         | 3.02%         | 1.29%         | 1.29%         |
| Symbols: ELF4   Protein of unknown function (OUF1313)   chr2:16734545-16734880 REVERSE LENGTH=111                             | AT2G40080.1      | 12 kDa           | 49.50%   | 49.50%   | 42.20%        | 67.60%        | 60.40%        | 49.50%        | 49.50%        |               |               |               |

|                                                                                                                               |                  |         |        |        |        |        |        |        |        |        |        |        |
|-------------------------------------------------------------------------------------------------------------------------------|------------------|---------|--------|--------|--------|--------|--------|--------|--------|--------|--------|--------|
| Symbols: MAT3   methionine adenosyltransferase 3   chr2:15479721-15480893 REVERSE LENGTH=390                                  | AT2G36880.1 (+1) | 42 kDa  | 20.50% | 11.50% | 10.00% | 3.85%  | 0      | 10.00% | 0      | 0      | 0      | 0      |
| Symbols: SAM-2, MAT2, SAM2, ATSAM2   S-adenosylmethionine synthetase 2   chr4:796298-797479 REVERSE LENGTH=393                | AT4G01850.1 (+1) | 43 kDa  | 23.70% | 9.16%  | 0      | 8.62%  | 0      | 9.41%  | 0      | 0      | 0      | 0      |
| Symbols: SAM1, SAM-1, MAT1, ATSAM1   S-adenosylmethionine synthetase 1   chr1:519037-520218 FORWARD LENGTH=393                | AT1G02500.1 (+1) | 43 kDa  | 19.80% | 5.34%  | 0      | 6.62%  | 0      | 12.20% | 0      | 0      | 0      | 0      |
| Symbols: RCA   rubisco activase   chr2:16570951-16573345 REVERSE LENGTH=474                                                   | AT2G39730.1      | 52 kDa  | 23.80% | 21.50% | 10.80% | 15.60% | 13.30% | 23.20% | 21.50% | 19.60% | 12.00% | 8.02%  |
| Symbols: PCL1, LUX   Homeodomain-like superfamily protein   chr3:17183248-17184219 FORWARD LENGTH=323                         | AT3G46640.1 (+1) | 35 kDa  | 3.10%  | 3.10%  | 10.20% | 18.90% | 10.20% | 22.90% | 3.10%  | 3.10%  | 3.10%  | 10.50% |
| Symbols: GS2, GLN2, ATGS1L   glutamine synthetase 2   chr5:13831220-13833239 FORWARD LENGTH=430                               | AT5G35630.1 (+2) | 47 kDa  | 22.80% | 17.70% | 16.50% | 33.00% | 16.50% | 22.60% | 17.70% | 14.00% | 3.49%  | 3.49%  |
| Symbols: CAT3, SEN2, ATCAT3   catalase 3   chr1:7143142-7146193 FORWARD LENGTH=485                                            | AT1G20620.5      | 56 kDa  | 37.30% | 32.00% | 4.74%  | 24.70% | 2.89%  | 28.00% | 23.70% | 11.50% | 2.27%  | 2.27%  |
| Symbols:   Clathrin, heavy chain   chr3:348275-3491667 REVERSE LENGTH=1705                                                    | AT3G11130.1      | 193 kDa | 13.30% | 8.68%  | 0      | 1.94%  | 0      | 5.04%  | 2.17%  | 1.29%  | 0      | 0      |
| Symbols:   Clathrin, heavy chain   chr3:2587171-2595411 REVERSE LENGTH=1703                                                   | AT3G08530.1      | 193 kDa | 12.40% | 7.99%  | 0      | 1.94%  | 0      | 5.05%  | 2.17%  | 1.29%  | 0      | 0      |
| Symbols:   Ribosomal protein S3 family protein   chr3:19951547-19952782 FORWARD LENGTH=249                                    | AT3G53870.1      | 27 kDa  | 16.90% | 16.90% | 16.90% | 22.50% | 16.90% | 25.70% | 10.40% | 10.40% | 10.40% | 5.22%  |
| Symbols:   Ribosomal protein S3 family protein   chr2:13450384-13451669 FORWARD LENGTH=250                                    | AT2G31610.1      | 28 kDa  | 20.00% | 20.00% | 16.80% | 22.40% | 16.80% | 30.80% | 13.60% | 10.40% | 5.20%  | 5.20%  |
| Symbols:   Ribosomal protein S3 family protein   chr5:13710355-13712192 REVERSE LENGTH=248                                    | AT5G35530.1      | 27 kDa  | 20.60% | 20.60% | 16.90% | 22.60% | 16.90% | 25.80% | 14.10% | 5.24%  | 5.24%  | 5.24%  |
| Symbols: EIF4A1, RH4, TIF4A1   eukaryotic translation initiation factor 4A1   chr3:4592635-4594128 REVERSE LENGTH=412         | AT3G13920.1 (+1) | 47 kDa  | 14.60% | 12.60% | 10.90% | 12.10% | 22.60% | 16.70% | 8.25%  | 5.83%  | 5.83%  | 5.83%  |
| Symbols: EIF4A-2   eif4a-2   chr1:20260495-20262018 FORWARD LENGTH=412                                                        | AT1G54270.1      | 47 kDa  | 10.20% | 8.25%  | 10.90% | 12.10% | 22.60% | 17.50% | 8.25%  | 5.83%  | 5.83%  | 5.83%  |
| Symbols: EIF4A-III   eukaryotic initiation factor 4A-III   chr3:6863790-6866242 FORWARD LENGTH=408                            | AT3G19760.1      | ?       | 0      | 0      | 0      | 0      | 0      | 0      | 0      | 0      | 0      | 0      |
| Symbols: BIP, BIP2   Heat shock protein 70 (Hsp 70) family protein   chr5:16807697-16810480 REVERSE LENGTH=668                | AT5G42020.1      | 74 kDa  | 5.99%  | 10.30% | 7.78%  | 19.50% | 15.60% | 23.20% | 2.40%  | 4.64%  | 6.59%  | 4.49%  |
| Symbols: DAYSLLEEPER   BED zinc finger; hAT family dimerisation domain   chr3:14321838-14323928 FORWARD LENGTH=696            | AT3G42170.1      | 79 kDa  | 19.00% | 11.40% | 0      | 15.90% | 0      | 27.20% | 7.80%  | 8.19%  | 4.02%  | 0      |
| MLK2   Symbols:   Protein kinase family protein   chr3:1014412-1018244 REVERSE LENGTH=701                                     | AT3G09340.1      | 78 kDa  | 8.27%  | 7.99%  | 0      | 6.56%  | 0      | 1.57%  | 19.80% | 13.00% | 13.40% | 9.42%  |
| MLK1   Symbols:   Protein kinase family protein   chr5:6010215-6013724 REVERSE LENGTH=691                                     | AT5G18190.1      | 77 kDa  | 12.40% | 10.70% | 0      | 4.92%  | 0      | 1.59%  | 14.00% | 14.00% | 10.70% | 10.70% |
| Symbols: GABP   glyceraldehyde-3-phosphate dehydrogenase B subunit   chr1:16127552-16129584 FORWARD LENGTH=447                | AT1G42970.1      | 48 kDa  | 26.00% | 21.70% | 3.36%  | 34.70% | 3.36%  | 40.50% | 16.30% | 12.30% | 9.62%  | 3.36%  |
| Symbols: SPA1   SPA (suppressor of phyA-105) protein family   chr2:19022572-19026821 REVERSE LENGTH=1029                      | AT2G46340.1      | 115 kDa | 13.50% | 8.84%  | 2.43%  | 8.07%  | 2.82%  | 8.55%  | 0      | 0      | 8.16%  | 5.83%  |
| Symbols:   Ribulose biphosphate carboxylase (small chain) family protein   chr5:15377501-15378306 REVERSE LENGTH=181          | AT5G38410.1      | 20 kDa  | 26.50% | 22.10% | 36.50% | 39.20% | 37.00% | 39.20% | 26.50% | 17.70% | 21.50% | 17.10% |
| Symbols:   Ribulose biphosphate carboxylase (small chain) family protein   chr5:15384350-15385155 REVERSE LENGTH=181          | AT5G38430.1      | 20 kDa  | 26.00% | 21.50% | 16.60% | 18.80% | 16.60% | 18.80% | 16.60% | 7.73%  | 12.20% | 7.73%  |
| Symbols: PHYA, FHY2, FRE1, HY8   phytochrome A   chr1:3095498-3099216 REVERSE LENGTH=1122                                     | AT1G09570.1      | 125 kDa | 1.16%  | 1.34%  | 11.30% | 5.17%  | 11.20% | 2.41%  | 0.00%  | 2.23%  | 7.40%  | 4.37%  |
| Symbols:   Ribosomal protein L4/L1 family   chr3:2953813-2955444 FORWARD LENGTH=406                                           | AT3G09630.1 (+1) | 45 kDa  | 3.69%  | 3.69%  | 3.45%  | 6.65%  | 3.45%  | 21.70% | 7.14%  | 3.69%  | 0      | 0      |
| Symbols:   Ribosomal protein L4/L1 family   chr5:657830-659264 FORWARD LENGTH=407                                             | AT5G02870.1 (+1) | 45 kDa  | 6.88%  | 6.88%  | 3.44%  | 7.13%  | 3.44%  | 18.20% | 6.63%  | 0      | 0      | 0      |
| Symbols: PSC1, ATPSC1   delta1-pyrroline-5-carboxylate synthase 1   chr2:16598516-16602939 REVERSE LENGTH=717                 | AT2G39800.1 (+1) | 78 kDa  | 12.10% | 13.20% | 3.35%  | 5.72%  | 3.35%  | 18.50% | 7.81%  | 6.00%  | 3.21%  | 0      |
| Symbols: PSC2   delta1-pyrroline-5-carboxylate synthase 2   chr3:20624278-20628989 REVERSE LENGTH=726                         | AT3G55610.1      | 79 kDa  | 0      | 0      | 0      | 0      | 0      | 0      | 0      | 0      | 0      | 0      |
| Symbols: RBCS1A   ribulose biphosphate carboxylase small chain 1A   chr1:2504865-25049249 REVERSE LENGTH=180                  | AT1G67090.1      | 20 kDa  | 26.70% | 26.70% | 26.70% | 38.90% | 27.20% | 38.90% | 22.20% | 17.80% | 7.78%  | 17.80% |
| Symbols: ATCMS, ATMETS, ATMS1   Cobalamin-independent synthase family protein   chr5:5935711-5939195 FORWARD LENGTH=765       | AT5G17920.1 (+1) | 84 kDa  | 7.06%  | 9.93%  | 7.06%  | 8.76%  | 5.75%  | 12.70% | 3.92%  | 1.83%  | 0      | 0      |
| Symbols: ATMS3, MS3   methionine synthase 3   chr5:7124397-7128353 REVERSE LENGTH=812                                         | AT5G20980.1 (+1) | 91 kDa  | 2.34%  | 3.20%  | 0      | 3.20%  | 0      | 1.97%  | 0      | 0      | 0      | 0      |
| Symbols: PGK1   phosphoglycerate kinase 1   chr3:4061127-4063140 REVERSE LENGTH=481                                           | AT3G12780.1      | 50 kDa  | 16.20% | 12.50% | 0      | 17.30% | 0      | 25.20% | 10.40% | 7.28%  | 3.53%  | 0      |
| Symbols: PGK   phosphoglycerate kinase   chr1:29924347-29926295 REVERSE LENGTH=401                                            | AT1G79550.1 (+1) | 42 kDa  | 8.73%  | 0      | 0      | 0      | 0      | 4.24%  | 4.24%  | 4.24%  | 0      | 0      |
| Symbols:   Phosphoglycerate kinase family protein   chr1:21028622-21030454 FORWARD LENGTH=405                                 | AT1G56190.2      | 43 kDa  | 11.10% | 0      | 11.40% | 0      | 0      | 13.60% | 0      | 0      | 0      | 0      |
| Symbols: LOS1   Ribosomal protein S5/Elongation factor G/III/V family protein   chr1:20968245-20971077 REVERSE LENGTH=843     | AT1G56070.1      | 94 kDa  | 5.93%  | 4.98%  | 2.73%  | 6.52%  | 4.15%  | 18.70% | 2.14%  | 2.14%  | 0      | 0      |
| Symbols:   structural constituent of ribosome   chrC:82826-83482 REVERSE LENGTH=218                                           | ATCG00800.1      | 25 kDa  | 30.70% | 22.50% | 9.17%  | 22.50% | 9.17%  | 31.20% | 4.13%  | 0      | 0      | 0      |
| Symbols: CAT2   catalase 2   chr4:16700937-16703215 REVERSE LENGTH=492                                                        | AT4G45090.1      | 57 kDa  | 27.40% | 17.90% | 6.91%  | 24.60% | 2.85%  | 19.50% | 12.40% | 12.20% | 2.24%  | 2.24%  |
| Symbols:   Ribosomal protein S27a / Ubiquitin family protein   chr1:8314940-8315410 FORWARD LENGTH=156                        | AT1G23410.1 (+3) | 18 kDa  | 21.20% | 21.20% | 10.30% | 15.40% | 10.30% | 15.40% | 21.20% | 16.00% | 5.77%  | 16.00% |
| Symbols: UBQ9   ubiquitin 9   chr5:14952782-14953750 REVERSE LENGTH=322                                                       | AT5G37640.1      | 36 kDa  | 0      | 7.76%  | 0      | 0      | 0      | 0      | 0      | 0      | 0      | 0      |
| Symbols: UBQ12   ubiquitin 12   chr1:20549533-20550225 FORWARD LENGTH=230                                                     | AT1G55060.1      | 26 kDa  | 0      | 0      | 0      | 0      | 0      | 0      | 0      | 0      | 0      | 0      |
| Symbols: UBQ8   ubiquitin 8   chr3:3004111-3006006 REVERSE LENGTH=631                                                         | AT3G09790.1      | 72 kDa  | 0      | 0      | 0      | 0      | 0      | 0      | 0      | 0      | 0      | 0      |
| Symbols:   GTP binding Elongation factor Tu family protein   chr1:2455559-2457001 FORWARD LENGTH=449                          | AT1G07920.1 (+5) | 50 kDa  | 8.91%  | 6.90%  | 2.45%  | 8.91%  | 2.45%  | 14.30% | 7.13%  | 2.45%  | 4.23%  | 2.45%  |
| Symbols:   Ribosomal protein L13 family protein   chr3:9064613-9065871 FORWARD LENGTH=206                                     | AT3G24830.1      | 23 kDa  | 5.83%  | 5.83%  | 6.80%  | 6.80%  | 12.60% | 6.80%  | 5.83%  | 11.70% | 0.00%  | 0      |
| Symbols:   Ribosomal protein L13 family protein   chr3:2252092-2253332 FORWARD LENGTH=206                                     | AT3G07110.1 (+1) | 23 kDa  | 11.70% | 12.10% | 6.80%  | 6.80%  | 0      | 6.80%  | 11.70% | 17.50% | 0      | 0      |
| Symbols:   Ribosomal protein L13 family protein   chr5:19771315-19772686 REVERSE LENGTH=206                                   | AT5G48760.1 (+1) | 24 kDa  | 0      | 0      | 0      | 6.80%  | 0      | 6.80%  | 5.83%  | 0      | 0      | 0      |
| Symbols:   Ribosomal protein L13 family protein   chr4:7655133-7656542 REVERSE LENGTH=206                                     | AT4G13170.1      | 24 kDa  | 0      | 6.31%  | 0      | 6.80%  | 0      | 0      | 11.70% | 0      | 0      | 0      |
| Symbols: HOG1, EMB1395, SAHH1, MEE58, ATSAHH1   S-adenosyl-L-homocysteine hydrolase   chr4:8054931-8056676 FORWARD LENGTH=485 | AT4G13940.1      | 53 kDa  | 6.39%  | 10.50% | 5.98%  | 8.66%  | 5.98%  | 17.10% | 2.06%  | 4.54%  | 0      | 0      |
| Symbols: SAHH2, ATSAHH2   S-adenosyl-L-homocysteine (SAH) hydrolase 2   chr3:8588013-8589671 REVERSE LENGTH=485               | AT3G2810.1       | 53 kDa  | 4.33%  | 4.33%  | 0      | 1.86%  | 0      | 10.30% | 0      | 2.47%  | 0      | 0      |
| Symbols: HOG1, SAHH1   S-adenosyl-L-homocysteine hydrolase   chr4:8054931-8056763 FORWARD LENGTH=325                          | AT4G13940.4      | 36 kDa  | 0      | 0      | 0      | 0      | 0      | 0      | 0      | 0      | 0      | 0      |
| Symbols: CRB, CSP41B, HIP1.3   chloroplast RNA binding   chr1:3015473-3018035 FORWARD LENGTH=378                              | AT1G09340.1      | 43 kDa  | 16.10% | 11.60% | 3.70%  | 4.23%  | 3.70%  | 18.00% | 3.70%  | 3.70%  | 0      | 0      |
| Symbols: ACC1, AT-ACC1, EMB22, GK, PAS3   acetyl-CoA carboxylase 1   chr1:13534196-13543773 FORWARD LENGTH=2254               | AT1G36160.1 (+1) | 251 kDa | 8.07%  | 0.80%  | 0      | 1.06%  | 0      | 2.09%  | 0      | 0      | 0      | 0      |
| Symbols:   Ribosomal protein S5 domain 2-like superfamily protein   chr5:6090253-6090693 REVERSE LENGTH=146                   | AT5G18380.1 (+1) | 17 kDa  | 22.60% | 28.10% | 6.85%  | 22.60% | 6.85%  | 13.00% | 22.60% | 22.60% | 0.00%  | 0      |
| Symbols:   Ribosomal protein S5 domain 2-like superfamily protein   chr2:3781442-3781882 FORWARD LENGTH=146                   | AT2G09990.1      | 17 kDa  | 15.80% | 21.20% | 0      | 15.80% | 0      | 6.16%  | 15.80% | 15.80% | 0.00%  | 0      |
| Symbols: CA1   carbonic anhydrase 1   chr3:194853-197873 REVERSE LENGTH=347                                                   | AT3G01500.2 (+1) | 37 kDa  | 8.36%  | 8.36%  | 4.90%  | 13.80% | 4.90%  | 18.40% | 11.00% | 4.61%  | 0.00%  | 0      |
| Symbols: CA2, CA18, BETA CA2   carbonic anhydrase 2   chr5:4758257-4762382 FORWARD LENGTH=331                                 | AT5G14740.1 (+1) | 37 kDa  | 3.93%  | 3.93%  | 5.14%  | 14.50% | 5.14%  | 23.60% | 3.93%  | 0.00%  | 0      | 0      |
| Symbols: ATAN11, LW01   Transducin/WD40 repeat-like superfamily protein   chr1:4395114-4396154 REVERSE LENGTH=346             | AT1G12910.1      | 39 kDa  | 21.40% | 29.50% | 21.10% | 30.90% | 16.80% | 21.10% | 21.70% | 19.40% | 11.00% | 11.00% |
| Symbols: MLK4   Protein kinase family protein   chr3:4469434-4473234 FORWARD LENGTH=703                                       | AT3G13670.1      | 79 kDa  | 10.20% | 12.70% | 0      | 0      | 0      | 1.71%  | 21.20% | 9.82%  | 10.80% | 13.40% |
| Symbols: RPS6, RPS6A   ribosomal protein S6   chr4:15346306-15347714 REVERSE LENGTH=250                                       | AT4G31700.1      | 28 kDa  | 10.80% | 24.00% | 0.00%  | 3.60%  | 0      | 20.80% | 24.00% | 20.80% | 10.80% | 4.80%  |
| Symbols:   Ribosomal protein L30/L7 family protein   chr2:132943-134264 REVERSE LENGTH=242                                    | AT2G01250.1      | 28 kDa  | 19.00% | 15.30% | 4.96%  | 0      | 4.96%  | 10.30% | 6.20%  | 9.92%  | 6.20%  | 0      |
| Symbols:   Ribosomal protein L30/L7 family protein   chr2:18249227-18250417 REVERSE LENGTH=247                                | AT2G44120.2      | 29 kDa  | 9.72%  | 15.00% | 0      | 6.07%  | 0      | 10.10% | 0.00%  | 3.64%  | 0      | 0      |
| Symbols:   Ribosomal protein L30/L7 family protein   chr3:4433809-4435109 FORWARD LENGTH=244                                  | AT3G13580.1 (+2) | 28 kDa  | 6.15%  | 11.50% | 0      | 0      | 0      | 4.10%  | 6.15%  | 0.00%  | 0      | 0      |
| Symbols:   Coatomer, alpha subunit   chr2:9152428-9156577 FORWARD LENGTH=1218                                                 | AT2G21390.1      | 136 kDa | 2.13%  | 0.00%  | 0      | 2.46%  | 0      | 10.00% | 0      | 0      | 0      | 0      |
| Symbols:   Coatomer, alpha subunit   chr1:22919814-22923728 FORWARD LENGTH=1216                                               | AT1G62020.1      | 137 kDa | 2.55%  | 1.23%  | 0      | 0.00%  | 0      | 5.26%  | 0      | 0      | 0      | 0      |
| Symbols: CAB3, AB180, LHCB1.2   chlorophyll A/B binding protein 3   chr1:10472443-10473246 REVERSE LENGTH=267                 | AT1G29910.1 (+1) | 28 kDa  | 7.49%  | 7.49%  | 13.90% | 7.49%  | 13.90% | 7.49%  | 4.49%  | 4.49%  | 4.49%  | 0      |
| Symbols: LHCB2.2, LHCB2   photosystem II light harvesting complex gene 2.2   chr2:1799436-1800329 REVERSE LENGTH=265          | AT2G05070.1 (+2) | 29 kDa  | 3.02%  | 3.02%  | 16.20% | 3.02%  | 3.02%  | 7.49%  | 0      | 0      | 0.00%  | 0      |
| Symbols: CAB1, AB140, CAB140, LHCB1.3   chlorophyll A/B binding protein 1   chr1:10478071-10478874 FORWARD LENGTH=267         | AT1G29930.1      | 28 kDa  | 7.49%  | 7.49%  | 13.90% | 7.49%  | 13.90% | 7.49%  | 4.49%  | 4.49%  | 4.49%  | 0      |
| Symbols: HSP60-2   heat shock protein 60-2   chr2:14075093-14078568 REVERSE LENGTH=585                                        | AT2G3210.1 (+1)  | 62 kDa  | 2.22%  | 6.50%  | 2.22%  | 7.69%  | 2.22%  | 4.44%  | 2.22%  | 0      | 0      | 0      |
| Symbols: HSP60, HSP60-3B   heat shock protein 60   chr3:8669013-8672278 FORWARD LENGTH=577                                    | AT3G23990.1      | 61 kDa  | 2.08%  | 7.80%  | 0      | 7.80%  | 0      | 6.59%  | 5.55%  | 2.08%  | 0      | 0      |
| Symbols:   Ribosomal protein S3Ae   chr3:1329751-1331418 FORWARD LENGTH=262                                                   | AT3G04840.1      | 30 kDa  | 12.20% | 12.20% | 5.34%  | 5.34%  | 5.34%  | 16.40% | 6.87%  | 6.87%  | 6.87%  | 0      |
| Symbols:   Ribosomal protein S3Ae   chr4:16548724-16550222 FORWARD LENGTH=262                                                 | AT4G34670.1      | 30 kDa  | 12.20% | 12.20% | 5.34%  | 12.60% | 5.34%  | 16.40% |        |        |        |        |

|                                                                                                                                                                 |                  |         |        |        |        |        |        |        |        |        |        |        |
|-----------------------------------------------------------------------------------------------------------------------------------------------------------------|------------------|---------|--------|--------|--------|--------|--------|--------|--------|--------|--------|--------|
| Symbols:   Coatomer, beta subunit   chr4:15269460-15272693 FORWARD LENGTH=948                                                                                   | AT4G31490.1      | 106 kDa | 10.10% | 5.91%  | 0      | 3.90%  | 0      | 7.81%  | 0.00%  | 0      | 0      | 0      |
| Symbols:   Coatomer, beta subunit   chr4:15264145-15267384 FORWARD LENGTH=948                                                                                   | AT4G31480.1 (+1) | 106 kDa | 10.10% | 5.91%  | 0      | 3.90%  | 0      | 6.22%  | 0      | 0      | 0      | 0      |
| Symbols: MLK3   Protein kinase family protein   chr2:10985118-10988652 REVERSE LENGTH=673                                                                       | AT2G25760.1      | 76 kDa  | 4.90%  | 6.39%  | 0      | 3.71%  | 0      | 3.71%  | 12.50% | 8.77%  | 9.06%  | 9.06%  |
| Symbols: RPT3   regulatory particle triple-A ATPase 3   chr5:23569155-23571116 FORWARD LENGTH=408                                                               | AT5G58290.1      | 46 kDa  | 9.80%  | 10.00% | 4.66%  | 6.66%  | 4.66%  | 8.09%  | 2.94%  | 2.94%  | 0      | 0.00%  |
| Symbols: CPN60B, LEN1   chaperonin 60 beta   chr1:20715717-20718673 REVERSE LENGTH=600                                                                          | AT1G55490.1 (+1) | 64 kDa  | 4.17%  | 10.70% | 0      | 4.33%  | 0      | 4.00%  | 4.33%  | 0      | 2.17%  | 0      |
| Symbols:   TCP-1/cpn60 chaperonin family protein   chr5:22874058-22876966 FORWARD LENGTH=597                                                                    | AT5G56500.1 (+1) | 63 kDa  | 0      | 4.52%  | 0      | 0      | 0      | 0      | 0      | 0      | 0      | 0      |
| Symbols: ATARCA, RACK1A_AT, RACK1A   Transducin/WD40 repeat-like superfamily protein   chr1:62252325-6223901 FORWARD LENGTH=327                                 | AT1G18080.1      | 36 kDa  | 2.75%  | 8.26%  | 0      | 8.56%  | 0      | 11.30% | 3.98%  | 0      | 0      | 0      |
| Symbols: RACK1B_AT   receptor for activated C kinase 1B   chr1:17981977-17983268 REVERSE LENGTH=326                                                             | AT1G48630.1      | 36 kDa  | 15.00% | 0.00%  | 0      | 0      | 0      | 6.13%  | 0      | 8.28%  | 0      | 0      |
| Symbols: RACK1C_AT   receptor for activated C kinase 1C   chr3:6211109-6212371 REVERSE LENGTH=326                                                               | AT3G18130.1      | 36 kDa  | 0      | 0      | 0      | 0      | 0      | 0      | 0      | 0      | 0      | 0      |
| Symbols: AHA2, PMA2, HA2   H(+)-ATPase 2   chr4:14770820-14775920 REVERSE LENGTH=948                                                                            | AT4G30190.1 (+1) | 104 kDa | 4.75%  | 3.90%  | 0      | 1.58%  | 0      | 3.27%  | 0      | 0      | 0      | 0      |
| Symbols: AHA1, PMA, OST2, HA1   H(+)-ATPase 1   chr2:8221858-8227268 FORWARD LENGTH=949                                                                         | AT2G18960.1      | 104 kDa | 4.74%  | 2.74%  | 0      | 1.58%  | 0      | 3.27%  | 0      | 0      | 0      | 0      |
| Symbols: AHA7, HA7   H(+)-ATPase 7   chr3:22298763-22303509 FORWARD LENGTH=961                                                                                  | AT3G60330.1 (+1) | 106 kDa | 1.04%  | 0      | 0      | 0      | 0      | 0      | 0.00%  | 0      | 0      | 0      |
| Symbols: AHA4, HA4   H(+)-ATPase 4   chr3:17693015-17697801 FORWARD LENGTH=960                                                                                  | AT3G47950.1      | 106 kDa | 0      | 0      | 0      | 0      | 0      | 0      | 0      | 0      | 0      | 0      |
| Symbols: AHA3, ATAH3, HA3   H(+)-ATPase 3   chr5:23231208-23236381 REVERSE LENGTH=949                                                                           | AT5G57350.1 (+1) | 104 kDa | 0      | 0      | 0      | 0      | 0      | 0      | 0      | 0      | 0      | 0      |
| Symbols: AHA10   autoinhibited H(+)-ATPase isoform 10   chr1:5904058-5908898 FORWARD LENGTH=947                                                                 | AT1G17260.1      | 105 kDa | 0      | 0      | 0      | 0      | 0      | 0      | 0      | 0      | 0      | 0      |
| Symbols:   ATPase, F1 complex, alpha subunit protein   chr2:3361474-3364028 FORWARD LENGTH=777                                                                  | AT2G07698.1      | 86 kDa  | 2.70%  | 2.70%  | 2.83%  | 5.66%  | 2.83%  | 7.08%  | 1.42%  | 0.00%  | 0      | 0      |
| Symbols: LWD2   Transducin/WD40 repeat-like superfamily protein   chr3:9793276-9794316 FORWARD LENGTH=346                                                       | AT3G26640.1      | 39 kDa  | 21.40% | 21.10% | 11.00% | 15.90% | 11.00% | 27.20% | 15.90% | 15.90% | 11.00% | 11.00% |
| Symbols:   ATPase, V1 complex, subunit B protein   chr1:7016971-7020290 FORWARD LENGTH=487                                                                      | AT1G20260.1 (+2) | 54 kDa  | 10.10% | 10.10% | 0      | 6.16%  | 0      | 7.19%  | 3.08%  | 7.19%  | 0      | 0      |
| Symbols: ATGSTF8, ATGSTF5, GST6, GSTF8   glutathione S-transferase phi 8   chr2:19558213-19559266 FORWARD LENGTH=263                                            | AT2G47730.1      | 29 kDa  | 15.60% | 10.60% | 0      | 0.00%  | 0      | 27.00% | 0      | 0      | 0      | 0      |
| Symbols: ATPC1   ATPase, F1 complex, gamma subunit protein   chr4:2350761-2351882 REVERSE LENGTH=373                                                            | AT4G04640.1      | 41 kDa  | 18.00% | 9.12%  | 0      | 6.17%  | 7.24%  | 6.17%  | 3.49%  | 6.17%  | 2.68%  | 0      |
| Symbols: FBA2   fructose-bisphosphate aldolase 2   chr4:18163714-18165659 REVERSE LENGTH=398                                                                    | AT4G38970.1      | 43 kDa  | 10.10% | 10.80% | 0      | 13.80% | 7.04%  | 14.60% | 10.80% | 7.04%  | 0      | 0      |
| Symbols: RPL16A   ribosomal protein large subunit 16A   chr2:17791794-17792946 FORWARD LENGTH=182                                                               | AT2G42740.1 (+4) | 21 kDa  | 12.10% | 12.10% | 7.69%  | 7.69%  | 7.69%  | 7.69%  | 7.69%  | 12.10% | 12.10% | 7.69%  |
| Symbols:   Transketolase   chr3:22454004-22456824 FORWARD LENGTH=741                                                                                            | AT3G0750.1 (+1)  | 80 kDa  | 6.21%  | 4.18%  | 0      | 0.00%  | 0      | 18.60% | 2.43%  | 0      | 0      | 0      |
| Symbols:   binding   chr3:19317899-19327014 FORWARD LENGTH=1606                                                                                                 | AT5G47690.1 (+1) | 181 kDa | 5.35%  | 0      | 0      | 2.37%  | 0      | 5.98%  | 0      | 0      | 0      | 0      |
| Symbols: SACS2, RPL10, RPL10A   Ribosomal protein L16p/L10e family protein   chr1:4888270-4889408 FORWARD LENGTH=220                                            | AT1G14320.1      | 25 kDa  | 5.45%  | 10.50% | 5.45%  | 5.00%  | 0      | 10.50% | 10.50% | 5.45%  | 5.45%  | 5.45%  |
| Symbols: CAC3   acetyl Co-enzyme a carboxylase carboxyltransferase alpha subunit   chr2:15917612-15920749 FORWARD LENGTH=769                                    | AT2G38040.1 (+1) | 85 kDa  | 6.63%  | 2.47%  | 0      | 0      | 0      | 7.41%  | 0      | 0      | 0      | 0      |
| Symbols: RAN-1, RAN1, ATRAN1   RAS-related nuclear protein-1   chr5:6760364-6761747 FORWARD LENGTH=221                                                          | AT5G20010.1 (+2) | 25 kDa  | 10.40% | 15.40% | 0      | 11.30% | 0      | 31.20% | 5.88%  | 0      | 0      | 0      |
| Symbols:   Ribosomal protein S4   chr5:4935124-4936334 REVERSE LENGTH=198                                                                                       | AT5G15200.1      | 23 kDa  | 9.60%  | 9.60%  | 7.58%  | 13.10% | 7.58%  | 13.10% | 4.55%  | 0      | 0      | 0      |
| Symbols:   Ribosomal protein S26e family protein   chr2:16918506-16919623 FORWARD LENGTH=133                                                                    | AT2G40510.1 (+2) | 15 kDa  | 18.00% | 18.00% | 0      | 18.00% | 0      | 18.00% | 18.00% | 18.00% | 6.77%  | 0      |
| Symbols: EMB2296   Ribosomal protein L2 family   chr2:7837151-7838160 FORWARD LENGTH=258                                                                        | AT2G18020.1      | 28 kDa  | 12.00% | 7.36%  | 7.36%  | 4.65%  | 7.36%  | 7.36%  | 7.36%  | 7.36%  | 7.36%  | 0.00%  |
| Symbols:   Ribosomal protein L2 family   chr4:17097613-17098656 FORWARD LENGTH=258                                                                              | AT4G6130.1       | 28 kDa  | 12.00% | 7.36%  | 0      | 4.65%  | 0      | 0      | 0      | 7.36%  | 0      | 0      |
| Symbols:   Histone superfamily protein   chr1:2369212-2369523 FORWARD LENGTH=103                                                                                | AT1G07660.1 (+8) | 11 kDa  | 9.71%  | 9.71%  | 7.77%  | 29.10% | 7.77%  | 29.10% | 9.71%  | 9.71%  | 9.71%  | 9.71%  |
| Symbols:   oxidoreductases, acting on the aldehyde or oxo group of donors, NAD or NADP as acceptor:copper ion binding   chr2:8613168-8615649 FORWARD LENGTH=401 | AT2G19940.1 (+1) | 44 kDa  | 19.70% | 3.99%  | 0      | 3.99%  | 0      | 8.98%  | 3.99%  | 0      | 0      | 0      |
| Symbols: ATPRS5B, RPS5B   ribosomal protein 5B   chr2:15647883-15649042 REVERSE LENGTH=207                                                                      | AT2G37270.1 (+3) | 23 kDa  | 17.90% | 6.28%  | 0      | 0      | 0      | 13.50% | 13.50% | 13.50% | 7.25%  | 0      |
| Symbols:   Thioredoxin superfamily protein   chr3:3672189-3673937 FORWARD LENGTH=266                                                                            | AT3G11630.1      | 29 kDa  | 0      | 6.39%  | 0      | 0.00%  | 0      | 12.40% | 6.39%  | 10.90% | 0      | 0      |
| Symbols: PIP1B, TMP-A, ATHH2, PIP1.2   plasma membrane intrinsic protein 1B   chr2:18910450-18911703 FORWARD LENGTH=286                                         | AT2G45960.1 (+2) | 31 kDa  | 3.50%  | 3.50%  | 0.00%  | 9.79%  | 6.29%  | 9.79%  | 3.50%  | 3.50%  | 0      | 0      |
| Symbols: RPL27A, RPL27AB   Ribosomal protein L18e/L15 superfamily protein   chr1:8263007-8263447 FORWARD LENGTH=146                                             | AT1G23290.1 (+1) | 16 kDa  | 10.30% | 10.30% | 0.00%  | 6.85%  | 0      | 8.22%  | 17.10% | 10.30% | 10.30% | 0      |
| Symbols:   Ribosomal protein L18ae/LX family protein   chr2:14532916-14534161 REVERSE LENGTH=178                                                                | AT2G34480.1      | 21 kDa  | 8.99%  | 4.49%  | 0      | 9.55%  | 0      | 4.49%  | 0.00%  | 4.49%  | 0      | 0      |
| Symbols:   Ribosomal protein L18ae/LX family protein   chr3:4910773-4911933 FORWARD LENGTH=178                                                                  | AT3G14600.1      | 21 kDa  | 0      | 0      | 0      | 5.06%  | 0      | 0      | 0      | 0      | 0      | 0      |
| Symbols: EMB2719, HAP15   PAM domain (PCI/PINT associated module) protein   chr1:7001409-7001454 REVERSE LENGTH=488                                             | AT1G20200.1      | 56 kDa  | 8.20%  | 8.81%  | 0      | 2.66%  | 0      | 9.02%  | 0      | 0      | 0      | 0      |
| Symbols:   PAM domain (PCI/PINT associated module) protein   chr1:28524623-28526718 REVERSE LENGTH=487                                                          | AT1G75990.1      | 56 kDa  | 8.21%  | 0      | 0      | 2.67%  | 0      | 9.03%  | 0      | 0      | 0      | 0      |
| Symbols: APS1   ATP sulfurylase 1   chr3:8112837-8114734 FORWARD LENGTH=463                                                                                     | AT3G22890.1      | 51 kDa  | 9.07%  | 2.59%  | 0      | 6.70%  | 0      | 9.29%  | 0      | 0      | 0      | 0      |
| Symbols: APS2, ASA1   Pseudouridine synthase/archaeosine transglycosylase-like family protein   chr1:6914835-6916657 REVERSE LENGTH=476                         | AT1G19920.1      | 54 kDa  | 0      | 0      | 0      | 0      | 0      | 0      | 0      | 0      | 0      | 0      |
| Symbols: APS3   Pseudouridine synthase/archaeosine transglycosylase-like family protein   chr4:8413443-8415311 REVERSE LENGTH=465                               | AT4G14680.1      | 52 kDa  | 0      | 0      | 0      | 0      | 0      | 0      | 0      | 0      | 0      | 0      |
| Symbols:   Tetra-tyrosine repeat (TPR)-like superfamily protein   chr3:22565440-22566678 REVERSE LENGTH=412                                                     | AT3G60980.1      | 47 kDa  | 0      | 0      | 0      | 0      | 0      | 13.80% | 14.10% | 0      | 0      | 0      |
| Symbols: SPA2   SPA1-related 2   chr4:6772163-6776675 FORWARD LENGTH=1036                                                                                       | AT4G11110.1      | 115 kDa | 10.60% | 11.60% | 0      | 0      | 0      | 0      | 0      | 0      | 0      | 0.00%  |
| Symbols: PORB   protochlorophyllide oxidoreductase B   chr4:13725648-13727107 FORWARD LENGTH=401                                                                | AT4G27440.1 (+1) | 43 kDa  | 12.50% | 7.48%  | 0      | 2.99%  | 0      | 2.99%  | 0      | 0      | 0      | 0      |
| Symbols: ATPF   ATP synthase epsilon chain   chrC:52265-52663 REVERSE LENGTH=132                                                                                | ATCG00470.1      | 14 kDa  | 27.30% | 27.30% | 0      | 11.40% | 0      | 11.40% | 15.90% | 27.30% | 0      | 0      |
| Symbols: RPL14   ribosomal protein L14   chrC:80696-81064 REVERSE LENGTH=122                                                                                    | ATCG00780.1      | 14 kDa  | 21.30% | 21.30% | 0      | 13.10% | 0      | 23.80% | 13.10% | 21.30% | 0.00%  | 0.00%  |
| Symbols:   C2 calcium/lipid-binding plant phosphoribosyltransferase family protein   chr5:2127200-2129584 REVERSE LENGTH=794                                    | AT5G06850.1      | 91 kDa  | 0      | 0      | 0      | 4.66%  | 0      | 8.44%  | 0      | 0      | 0      | 0      |
| Symbols: FDH   formate dehydrogenase   chr5:4777043-4779190 FORWARD LENGTH=384                                                                                  | AT5G14780.1      | 42 kDa  | 9.38%  | 3.12%  | 0      | 7.03%  | 0      | 16.40% | 0      | 7.03%  | 0      | 0      |
| Symbols: TOC1, APRR1, PRR1, ATTOC1   CCT motif-containing response regulator protein   chr5:24675540-24678176 FORWARD LENGTH=618                                | AT5G61380.1      | 69 kDa  | 4.05%  | 4.05%  | 5.34%  | 0      | 7.28%  | 0      | 1.94%  | 0      | 2.10%  | 2.10%  |
| Symbols: ELF4-L2   ELF4-like 2   chr1:27344988-27345347 FORWARD LENGTH=119                                                                                      | AT1G72630.1      | 13 kDa  | 0      | 10.90% | 0      | 12.60% | 0      | 10.90% | 21.80% | 21.80% | 21.80% | 10.90% |
| Symbols: STV1, RPL24B, RPL24   Ribosomal protein L24e family protein   chr3:19660749-19661912 REVERSE LENGTH=163                                                | AT3G53020.1      | 19 kDa  | 14.70% | 14.70% | 0      | 7.36%  | 0      | 7.36%  | 14.70% | 14.70% | 0      | 0      |
| Symbols:   glycine-rich protein   chr4:11944050-11945565 REVERSE LENGTH=356                                                                                     | AT4G22740.1 (+1) | 39 kDa  | 12.10% | 12.10% | 0      | 0      | 0      | 12.10% | 7.58%  | 0.00%  | 0      | 0      |
| Symbols:   Ribosomal L28e protein family   chr2:8511752-8512995 FORWARD LENGTH=143                                                                              | AT2G19730.1 (+2) | 16 kDa  | 13.30% | 13.30% | 0      | 0      | 0      | 24.50% | 0.00%  | 0.00%  | 24.50% | 0      |
| Symbols:   Ribosomal protein S11 family protein   chr2:15169925-15171159 FORWARD LENGTH=150                                                                     | AT2G31610.1      | 16 kDa  | 16.00% | 16.00% | 8.67%  | 23.30% | 8.67%  | 23.30% | 0      | 0      | 0      | 0      |
| Symbols:   Ribosomal protein S11 family protein   chr3:3623757-3624886 REVERSE LENGTH=150                                                                       | AT3G11510.1      | 16 kDa  | 8.67%  | 16.00% | 8.67%  | 16.00% | 8.67%  | 16.00% | 0      | 0      | 0      | 0      |
| Symbols:   Coatomer, beta' subunit   chr3:5411699-5418133 REVERSE LENGTH=909                                                                                    | AT3G15980.1 (+3) | 102 kDa | 3.74%  | 1.10%  | 0      | 0.00%  | 0      | 5.28%  | 0      | 0      | 0      | 0      |
| Symbols:   structural molecules   chr1:30084522-30091949 FORWARD LENGTH=1135                                                                                    | AT1G79990.1 (+2) | 129 kDa | 2.11%  | 0      | 0      | 0      | 0      | 1.76%  | 0      | 0      | 0      | 0      |
| Symbols: XIX, ATXK, XI-17   Myosin family protein with Dil domain   chr5:6927064-6936825 REVERSE LENGTH=1545                                                    | AT5G20490.1 (+1) | 175 kDa | 0.91%  | 2.20%  | 0      | 0      | 0      | 0      | 0      | 0      | 0      | 0      |
| Symbols: MYA1, ATMYA1, XI-1   myosin 1   chr1:6039453-6049309 FORWARD LENGTH=1520                                                                               | AT1G17580.1      | 173 kDa | 1.38%  | 1.32%  | 0      | 0      | 0      | 0      | 0      | 0      | 0      | 0      |
| Symbols: XIX, ATXK   Myosin family protein with Dil domain   chr1:2779963-2788325 FORWARD LENGTH=1538                                                           | AT1G08730.1      | 175 kDa | 0      | 1.30%  | 0      | 0.00%  | 0      | 0      | 0      | 0      | 0      | 0      |
| Symbols: HSP81-2, ERD8, HSP90.2, ATHSP90.2   heat shock protein 81-2   chr5:22686923-22689433 FORWARD LENGTH=699                                                | AT5G56030.1 (+1) | 80 kDa  | 5.72%  | 4.01%  | 0      | 2.00%  | 0      | 2.00%  | 2.00%  | 0      | 0      | 0      |
| Symbols: PIP3, PIP3A, PIP2.7, SIMIP   plasma membrane intrinsic protein 3   chr4:16708672-16709958 FORWARD LENGTH=280                                           | AT4G35100.1 (+1) | 30 kDa  | 17.10% | 17.10% | 6.79%  | 11.10% | 6.79%  | 0      | 11.10% | 0      | 3.60%  | 0      |
| Symbols: RPS4   chloroplast ribosomal protein S4   chrC:45223-45828 REVERSE LENGTH=201                                                                          | ATCG00380.1      | 23 kDa  | 3.98%  | 3.98%  | 0      | 0      | 0      | 0.00%  | 8.96%  | 0      | 0      | 0      |
| Symbols: LOS2, ENO2   Enolase   chr2:15321081-15323786 REVERSE LENGTH=444                                                                                       | AT2G36530.1      | 48 kDa  | 3.38%  | 3.38%  | 0      | 3.38%  | 0      | 7.88%  | 3.38%  | 0      | 0      | 0      |
| Symbols:   ATPase, VU/A0 complex, subunit C/D   chr3:10778025-10780350 FORWARD LENGTH=351                                                                       | AT3G28715.1      | 41 kDa  | 9.12%  | 5.70%  | 0      | 4.27%  | 0      | 4.27%  | 5.70%  | 0      | 0      | 0      |
| Symbols:   ATPase, VU/A0 complex, subunit C/D   chr3:10773144-10775594 REVERSE LENGTH=351                                                                       | AT3G28710.1      | 41 kDa  | 5.70%  | 5.70%  | 0      | 9.97%  | 0      | 9.97%  | 0      | 0      | 0      | 0      |
| Symbols: cpHsc70-1   chloroplast heat shock protein 70-1   chr4:12590094-12593437 FORWARD LENGTH=718                                                            | AT4G24280.1      | 77 kDa  | 0      | 0      | 0      | 2.92%  | 0      | 8.77%  | 1.95%  | 0      | 0      | 0      |
| Symbols: cpHsc70-2EAT SHOCK PROTEIN 70-2, HSC70-7, cpHsc70-2   chloroplast heat shock protein 70-2   chr5:20303470-20306295 FORWARD LENGTH=718                  | AT5G49910.1      | 77 kDa  | 0      | 0      | 0      | 5.15%  | 0      | 6.55%  | 1.95%  | 0      | 0      | 0      |
| Symbols: LUH   LEUNIG_homolog   chr2:13867235-13871844 FORWARD LENGTH=787                                                                                       | AT2G32700.1 (+6) | 86 kDa  | 0      | 0      | 0      | 1.52%  | 0      | 6.48%  | 0      | 0      | 0      | 0      |
| Symbols: emb1138   DEAD box RNA helicase (RH3)   chr5:9285540-9288871 REVERSE LENGTH=747                                                                        | AT5G26742.1 (+1) | 81 kDa  | 5.62%  | 6.02%  | 0      | 1.87%  | 0      | 0.00%  | 0      | 0      | 0      | 0      |



|                                                                                                                                                                   |                  |         |        |        |        |        |        |        |        |        |        |   |   |   |   |   |   |   |       |
|-------------------------------------------------------------------------------------------------------------------------------------------------------------------|------------------|---------|--------|--------|--------|--------|--------|--------|--------|--------|--------|---|---|---|---|---|---|---|-------|
| Symbols:   Aldolase superfamily protein   chr5:963389-964982 REVERSE LENGTH=359                                                                                   | AT5G03690.2      | 39 kDa  | 0      | 0      | 0      | 3.90%  | 0      | 0      | 0      | 0      | 0      | 0 | 0 | 0 | 0 | 0 | 0 | 0 | 0     |
| Symbols:   Aldolase superfamily protein   chr4:13391566-13392937 FORWARD LENGTH=358                                                                               | AT4G26530.1 (+1) | 38 kDa  | 0      | 0      | 0      | 0      | 0      | 0      | 0      | 3.91%  | 0      | 0 | 0 | 0 | 0 | 0 | 0 | 0 | 0     |
| Symbols:   CHL1, CH42, CH-42, CHL11, CHU-1   P-loop containing nucleoside triphosphate hydrolases superfamily protein   chr1:10201897-10203361 REVERSE LENGTH=424 | AT4G18480.1      | 46 kDa  | 8.49%  | 4.95%  | 0      | 0.00%  | 0      | 0      | 7.31%  | 0      | 0      | 0 | 0 | 0 | 0 | 0 | 0 | 0 | 0     |
| Symbols:   CHL2, CHL I2, CHLI-2   magnesium chelatase i2   chr5:18628095-18629565 FORWARD LENGTH=418                                                              | AT5G45930.1      | 46 kDa  | 0      | 0      | 0      | 0      | 0      | 0      | 0      | 0      | 0      | 0 | 0 | 0 | 0 | 0 | 0 | 0 | 0     |
| Symbols:   transducin family protein / WD-40 repeat family protein   chr3:23431009-23437241 REVERSE LENGTH=1104                                                   | AT3G63460.1 (+2) | 120 kDa | 1.18%  | 1.18%  | 0      | 1.36%  | 0      | 2.54%  | 0      | 0      | 0      | 0 | 0 | 0 | 0 | 0 | 0 | 0 | 0     |
| Symbols:   vacuolar ATP synthase subunit H family protein   chr3:14228846-14232228 REVERSE LENGTH=441                                                             | AT3G42050.1      | 50 kDa  | 6.35%  | 2.95%  | 0      | 4.08%  | 0      | 2.95%  | 0      | 0      | 0      | 0 | 0 | 0 | 0 | 0 | 0 | 0 | 0     |
| Symbols:   RPL18   ribosomal protein L18   chr3:1621511-1622775 FORWARD LENGTH=187                                                                                | AT3G05590.1 (+1) | 21 kDa  | 12.80% | 5.88%  | 6.95%  | 5.88%  | 0      | 13.40% | 5.88%  | 5.88%  | 0      | 0 | 0 | 0 | 0 | 0 | 0 | 0 | 0     |
| Symbols:   RPT5A, AT56A.2   regulatory particle triple-A ATPase 5A   chr3:1603540-1605993 FORWARD LENGTH=424                                                      | AT3G05530.1      | 47 kDa  | 13.70% | 7.55%  | 0      | 0      | 0      | 4.27%  | 7.55%  | 7.55%  | 0      | 0 | 0 | 0 | 0 | 0 | 0 | 0 | 0.00% |
| Symbols:   AGT, AGT1, SGAT   alanine:glyoxylate aminotransferase   chr2:5539417-5540902 REVERSE LENGTH=401                                                        | AT2G13360.1 (+1) | 44 kDa  | 3.99%  | 3.99%  | 4.24%  | 0      | 4.24%  | 6.98%  | 0      | 0      | 0      | 0 | 0 | 0 | 0 | 0 | 0 | 0 | 0     |
| Symbols:   Ribosomal protein L22p/L17e family protein   chr1:9515230-9516725 FORWARD LENGTH=176                                                                   | AT1G27400.1 (+1) | 20 kDa  | 0      | 5.11%  | 10.80% | 0.00%  | 5.68%  | 15.90% | 0      | 0      | 0      | 0 | 0 | 0 | 0 | 0 | 0 | 0 | 0     |
| Symbols:   VHA-A   vacuolar ATP synthase subunit A   chr1:29660463-29664575 FORWARD LENGTH=623                                                                    | AT1G78900.1 (+1) | 69 kDa  | 1.77%  | 0.00%  | 0      | 0      | 0      | 4.33%  | 0      | 0      | 0      | 0 | 0 | 0 | 0 | 0 | 0 | 0 | 0     |
| Symbols:   RPT1A   regulatory particle triple-A 1A   chr1:20065921-20068324 REVERSE LENGTH=426                                                                    | AT1G53750.1      | 48 kDa  | 5.63%  | 2.11%  | 0      | 3.05%  | 0      | 3.05%  | 0      | 0.00%  | 0      | 0 | 0 | 0 | 0 | 0 | 0 | 0 | 0     |
| Symbols:   ATJ2, J2   DNAJ homologue 2   chr5:7303798-7305668 REVERSE LENGTH=419                                                                                  | AT5G2060.1       | 46 kDa  | 6.21%  | 6.21%  | 0      | 0      | 0      | 2.86%  | 0      | 0      | 0      | 0 | 0 | 0 | 0 | 0 | 0 | 0 | 0     |
| Symbols:   ATJ3, ATJ   DNAJ homologue 3   chr3:15869115-15871059 REVERSE LENGTH=420                                                                               | AT3G44110.1 (+1) | 46 kDa  | 6.19%  | 6.19%  | 0      | 0      | 0      | 5.95%  | 0      | 0      | 0      | 0 | 0 | 0 | 0 | 0 | 0 | 0 | 0     |
| Symbols:   RPS1, ARRP51   ribosomal protein S1   chr5:11619262-11621223 REVERSE LENGTH=416                                                                        | AT5G30510.1      | 45 kDa  | 3.61%  | 0      | 0      | 8.17%  | 0      | 10.60% | 0      | 0      | 0      | 0 | 0 | 0 | 0 | 0 | 0 | 0 | 0     |
| Symbols:   ACCD   acetyl-CoA carboxylase carboxyl transferase subunit beta   chrC:57075-58541 FORWARD LENGTH=488                                                  | ATCG00500.1      | 56 kDa  | 6.56%  | 2.87%  | 0      | 0      | 0      | 2.66%  | 0      | 0      | 0      | 0 | 0 | 0 | 0 | 0 | 0 | 0 | 0     |
| Symbols:   RPS8   ribosomal protein S8   chrC:80068-80472 REVERSE LENGTH=134                                                                                      | ATCG00770.1      | 15 kDa  | 8.96%  | 17.20% | 0      | 8.96%  | 0      | 8.96%  | 8.21%  | 8.21%  | 0      | 0 | 0 | 0 | 0 | 0 | 0 | 0 | 0     |
| Symbols:   SSR16   small subunit ribosomal protein 16   chr4:16535084-16536092 REVERSE LENGTH=113                                                                 | AT4G34620.1      | 13 kDa  | 13.30% | 13.30% | 0      | 13.30% | 0      | 13.30% | 13.30% | 13.30% | 25.70% | 0 | 0 | 0 | 0 | 0 | 0 | 0 | 0     |
| Symbols:   Sucrose-6P-phosphate phosphohydrolase family protein   chr2:15053952-15055776 FORWARD LENGTH=422                                                       | AT2G35840.1 (+2) | 48 kDa  | 4.50%  | 0      | 0      | 0      | 0      | 6.16%  | 0      | 0      | 0      | 0 | 0 | 0 | 0 | 0 | 0 | 0 | 0     |
| Symbols:   GTP binding Elongation factor Tu family protein   chr4:1295751-1298354 REVERSE LENGTH=454                                                              | AT4G02930.1      | 49 kDa  | 8.15%  | 0      | 0      | 3.52%  | 0      | 8.37%  | 0      | 0      | 0      | 0 | 0 | 0 | 0 | 0 | 0 | 0 | 0     |
| Symbols:   ECT2   evolutionarily conserved C-terminal region 2   chr3:4385274-4388220 REVERSE LENGTH=667                                                          | AT3G13460.1 (+3) | 72 kDa  | 7.50%  | 5.55%  | 0      | 0.00%  | 0      | 0      | 0      | 0      | 0      | 0 | 0 | 0 | 0 | 0 | 0 | 0 | 0     |
| Symbols:   Glycine cleavage T-protein family   chr1:4001801-4003245 FORWARD LENGTH=408                                                                            | AT1G11860.1 (+2) | 44 kDa  | 5.64%  | 5.64%  | 0      | 5.64%  | 0      | 5.64%  | 9.56%  | 0      | 0      | 0 | 0 | 0 | 0 | 0 | 0 | 0 | 0     |
| Symbols:   NOP56   homolog of nucleolar protein NOP56   chr1:20798454-20986893 REVERSE LENGTH=522                                                                 | AT1G56110.1      | 59 kDa  | 2.87%  | 0.00%  | 0      | 0      | 0      | 5.94%  | 0      | 0      | 0      | 0 | 0 | 0 | 0 | 0 | 0 | 0 | 0     |
| Symbols:   RPS15A   ribosomal protein S15A   chr1:2408413-2409065 REVERSE LENGTH=130                                                                              | AT1G07770.1 (+2) | 15 kDa  | 6.92%  | 6.92%  | 10.80% | 0      | 10.80% | 23.10% | 0      | 0      | 0      | 0 | 0 | 0 | 0 | 0 | 0 | 0 | 0     |
| Symbols:   Ribosomal protein S8 family protein   chr2:16517588-16518265 REVERSE LENGTH=136                                                                        | AT2G35790.1      | 15 kDa  | 0      | 0      | 0      | 0      | 0      | 0      | 0      | 0      | 0      | 0 | 0 | 0 | 0 | 0 | 0 | 0 | 0     |
| Symbols:   RPN1A, ATRPN1A   26S proteasome regulatory subunit S2 1A   chr2:2885211-48864699 FORWARD LENGTH=891                                                    | AT2G20580.1      | 7       | 0.00%  | 0.00%  | 0      | 0      | 0      | 0.00%  | 0      | 0      | 0      | 0 | 0 | 0 | 0 | 0 | 0 | 0 | 0     |
| Symbols:   PAC1   20S proteasome alpha subunit C1   chr3:7792819-7793571 REVERSE LENGTH=250                                                                       | AT3G21110.1      | 27 kDa  | 0      | 11.20% | 0      | 0      | 0      | 4.80%  | 6.40%  | 6.40%  | 0      | 0 | 0 | 0 | 0 | 0 | 0 | 0 | 0     |
| Symbols:   ATBBC1, BBC1, RSU2   breast basic conserved 1   chr3:18166971-18168047 REVERSE LENGTH=206                                                              | AT3G49010.1 (+3) | 24 kDa  | 0      | 0.00%  | 0      | 11.70% | 0      | 17.00% | 11.70% | 0.00%  | 0      | 0 | 0 | 0 | 0 | 0 | 0 | 0 | 0     |
| Symbols:   Tetraatricopeptide repeat (TPR)-like superfamily protein   chr3:22535729-22536940 FORWARD LENGTH=403                                                   | AT3G60960.1      | 46 kDa  | 0      | 0      | 0      | 0      | 0      | 2.23%  | 4.71%  | 0      | 0      | 0 | 0 | 0 | 0 | 0 | 0 | 0 | 0     |
| Symbols:   CPN60A, CH-CPN60A, SLP   chaperonin-60alpha   chr2:11926603-11929184 FORWARD LENGTH=586                                                                | AT2G28000.1      | 62 kDa  | 4.44%  | 2.22%  | 0      | 0.00%  | 0      | 0.00%  | 0      | 0      | 0      | 0 | 0 | 0 | 0 | 0 | 0 | 0 | 0     |
| Symbols:   ATTIP49A, RIN1   P-loop containing nucleoside triphosphate hydrolases superfamily protein   chr5:7391026-7394071 REVERSE LENGTH=458                    | AT5G22320.1      | 50 kDa  | 0.00%  | 5.02%  | 0      | 5.24%  | 0      | 2.40%  | 0      | 0      | 0      | 0 | 0 | 0 | 0 | 0 | 0 | 0 | 0     |
| Symbols:   RPL16   ribosomal protein L16   chrC:81189-82652 REVERSE LENGTH=135                                                                                    | ATCG00790.1      | 15 kDa  | 10.40% | 0.00%  | 0      | 10.40% | 0      | 20.70% | 0      | 0      | 0      | 0 | 0 | 0 | 0 | 0 | 0 | 0 | 0     |
| Symbols:   PUB12, AtPUB12   PLANT U-BOX 12   chr2:12367001-12370608 REVERSE LENGTH=962                                                                            | AT2G28830.1      | 107 kDa | 1.46%  | 0.00%  | 0      | 1.46%  | 0      | 1.46%  | 0      | 0      | 0      | 0 | 0 | 0 | 0 | 0 | 0 | 0 | 0     |
| Symbols:   NAD(P)-binding Rossmann-fold superfamily protein   chr3:11193767-11194948 REVERSE LENGTH=298                                                           | AT3G29250.1      | 32 kDa  | 0      | 0      | 0      | 4.03%  | 0      | 18.10% | 0      | 0      | 0      | 0 | 0 | 0 | 0 | 0 | 0 | 0 | 0     |
| Symbols:   ILA   LUTYHIA   chr1:24065232-24081908 REVERSE LENGTH=2610                                                                                             | AT1G64790.1 (+1) | 285 kDa | 2.07%  | 0      | 0      | 0.00%  | 0      | 0      | 0      | 0      | 0      | 0 | 0 | 0 | 0 | 0 | 0 | 0 | 0     |
| Symbols:   APUM5, PUM5   pumilio 5   chr3:7059098-7062660 REVERSE LENGTH=961                                                                                      | AT3G20250.1      | 107 kDa | 3.75%  | 1.04%  | 0      | 1.04%  | 0      | 0      | 0      | 0      | 0      | 0 | 0 | 0 | 0 | 0 | 0 | 0 | 0     |
| Symbols:   ATPP57, TP57, ATPP5A   trehalose-phosphatase/synthase 7   chr1:1955413-1958153 FORWARD LENGTH=851                                                      | AT1G06410.1      | 97 kDa  | 1.29%  | 0      | 0      | 0      | 0      | 3.41%  | 0      | 0      | 0      | 0 | 0 | 0 | 0 | 0 | 0 | 0 | 0     |
| Symbols:   transcription regulators   chr1:373335-386682 FORWARD LENGTH=2431                                                                                      | AT1G02080.1 (+1) | 270 kDa | 1.93%  | 0.74%  | 0      | 0      | 0      | 0      | 0      | 0      | 0      | 0 | 0 | 0 | 0 | 0 | 0 | 0 | 0     |
| Symbols:   ATGSTF9, GLUTTR, ATGSTF7, GSTF9   glutathione S-transferase PHI 9   chr2:13139132-13140057 FORWARD LENGTH=215                                          | AT2G30860.1 (+1) | 24 kDa  | 0      | 16.70% | 0      | 3.72%  | 0      | 0      | 0      | 0      | 0      | 0 | 0 | 0 | 0 | 0 | 0 | 0 | 0     |
| Symbols:   Ribosomal protein L35Ae family protein   chr1:27928415-27929466 REVERSE LENGTH=112                                                                     | AT1G74270.1      | 13 kDa  | 22.30% | 0      | 0      | 33.00% | 0      | 22.30% | 0      | 0      | 0      | 0 | 0 | 0 | 0 | 0 | 0 | 0 | 0     |
| Symbols:   ATU2AF35B, U2AF35B   Zinc finger C-x8-C-x5-C-x3-H type family protein   chr5:17170445-17171296 REVERSE LENGTH=283                                      | AT5G42820.1 (+1) | 33 kDa  | 8.13%  | 0      | 0      | 6.36%  | 0      | 6.36%  | 0      | 0      | 0      | 0 | 0 | 0 | 0 | 0 | 0 | 0 | 0     |
| Symbols:   ATU2AF35A   U2 snRNP auxiliary factor small subunit, putative   chr1:9615302-9616042 FORWARD LENGTH=246                                                | AT1G27650.2      | 29 kDa  | 0      | 0      | 0      | 7.32%  | 0      | 7.32%  | 0      | 0      | 0      | 0 | 0 | 0 | 0 | 0 | 0 | 0 | 0     |
| Symbols:   Zinc finger C-x8-C-x5-C-x3-H type family protein   chr3:13282221-16328448 REVERSE LENGTH=75                                                            | AT3G44785.1      | 9 kDa   | 0      | 0      | 0      | 0      | 0      | 0      | 0      | 0      | 0      | 0 | 0 | 0 | 0 | 0 | 0 | 0 | 0     |
| Symbols:   PIL6, PIF5   phytochrome interacting factor 3-like 6   chr3:21828189-21829895 REVERSE LENGTH=442                                                       | AT3G59060.1 (+3) | 49 kDa  | 0      | 0.00%  | 2.71%  | 0      | 0      | 9.95%  | 0      | 0      | 0      | 0 | 0 | 0 | 0 | 0 | 0 | 0 | 0     |
| Symbols:   PIF4, SRL2, AtPIF4   phytochrome interacting factor 4   chr2:17887003-17888823 FORWARD LENGTH=340                                                      | AT2G43010.1 (+1) | 48 kDa  | 0      | 0      | 2.79%  | 0      | 0      | 0.00%  | 2.79%  | 0      | 0      | 0 | 0 | 0 | 0 | 0 | 0 | 0 | 0     |
| Symbols:   Ribosomal protein L31e family protein   chr2:8513577-8514346 FORWARD LENGTH=119                                                                        | AT2G19740.1 (+2) | 14 kDa  | 0      | 0      | 0      | 31.90% | 0      | 31.90% | 0      | 0      | 0      | 0 | 0 | 0 | 0 | 0 | 0 | 0 | 0     |
| Symbols:   Ribosomal protein L31e family protein   chr5:22944003-22944767 REVERSE LENGTH=85                                                                       | AT5G56710.2      | 10 kDa  | 0      | 0      | 0      | 9.41%  | 0      | 9.41%  | 0      | 0      | 0      | 0 | 0 | 0 | 0 | 0 | 0 | 0 | 0     |
| Symbols:   Coatomer epsilon subunit   chr1:10858546-10860173 REVERSE LENGTH=292                                                                                   | AT1G30630.1      | 33 kDa  | 0      | 0      | 0      | 14.70% | 0      | 14.70% | 0      | 0      | 0      | 0 | 0 | 0 | 0 | 0 | 0 | 0 | 0     |
| Symbols:   SHM4   serine hydroxymethyltransferase 4   chr4:8048013-8050021 REVERSE LENGTH=471                                                                     | AT4G13930.1      | 52 kDa  | 6.37%  | 3.40%  | 0      | 0      | 0      | 0      | 0      | 0      | 0      | 0 | 0 | 0 | 0 | 0 | 0 | 0 | 0     |
| Symbols:   RPL22   ribosomal protein L22   chrC:83467-83949 REVERSE LENGTH=160                                                                                    | ATCG0810.1       | 19 kDa  | 0      | 0      | 0      | 8.12%  | 0      | 14.40% | 0      | 0      | 0      | 0 | 0 | 0 | 0 | 0 | 0 | 0 | 0     |
| Symbols:   PBE1   20S proteasome beta subunit E1   chr1:4452641-4454663 FORWARD LENGTH=274                                                                        | AT1G13060.1 (+2) | 30 kDa  | 0      | 14.20% | 0      | 0      | 0      | 0      | 0      | 0.00%  | 0      | 0 | 0 | 0 | 0 | 0 | 0 | 0 | 0     |
| Symbols:   PSB8   photosystem II reaction center protein B   chrC:72371-73897 FORWARD LENGTH=508                                                                  | ATCG0680.1       | 56 kDa  | 3.35%  | 2.17%  | 0      | 0      | 0      | 5.51%  | 0      | 0      | 0      | 0 | 0 | 0 | 0 | 0 | 0 | 0 | 0     |
| Symbols:   NRPB1, RPB1, RNA_POL_II_LSRNA_POL_II_LS, RNA_POL_II_LS   RNA polymerase II large subunit   chr4:16961115-16967892 REVERSE LENGTH=1839                  | AT4G35800.1      | 205 kDa | 1.96%  | 0      | 0      | 0      | 0      | 0.00%  | 0      | 0      | 0      | 0 | 0 | 0 | 0 | 0 | 0 | 0 | 0     |
| Symbols:   EMB2761   threonyl-tRNA synthetase, putative / threonine--tRNA ligase, putative   chr2:1698466-1701271 REVERSE LENGTH=650                              | AT2G04842.1      | 75 kDa  | 0      | 0      | 0      | 0.00%  | 0      | 4.00%  | 0      | 0      | 0      | 0 | 0 | 0 | 0 | 0 | 0 | 0 | 0     |
| Symbols:   ELF4-L4   ELF4-like 4   chr1:5997932-5998276 FORWARD LENGTH=114                                                                                        | AT1G17455.1 (+1) | 13 kDa  | 0      | 0      | 0      | 0      | 0      | 22.80% | 22.80% | 11.40% | 0.00%  | 0 | 0 | 0 | 0 | 0 | 0 | 0 | 0     |
| Symbols:   AAA-type ATPase family protein   chr1:17009220-17011607 FORWARD LENGTH=399                                                                             | AT1G45000.1 (+2) | 45 kDa  | 6.02%  | 6.02%  | 0      | 0      | 0      | 6.02%  | 0      | 0      | 0      | 0 | 0 | 0 | 0 | 0 | 0 | 0 | 0     |
| Symbols:   PHOT1, NPH1, JK224, RPT1   phototropin 1   chr3:16818557-16823960 FORWARD LENGTH=996                                                                   | AT3G45780.1 (+1) | 112 kDa | 2.51%  | 0      | 0      | 0      | 0      | 2.11%  | 0      | 0      | 0      | 0 | 0 | 0 | 0 | 0 | 0 | 0 | 0     |
| Symbols:   PHOT2, NPL1   phototropin 2   chr5:23524771-23529993 FORWARD LENGTH=915                                                                                | AT5G58140.1 (+3) | 102 kDa | 0      | 0      | 0      | 0      | 0      | 0      | 0      | 0      | 0      | 0 | 0 | 0 | 0 | 0 | 0 | 0 | 0     |
| Symbols:   ZFN1   zinc finger protein 1   chr3:614075-615916 FORWARD LENGTH=397                                                                                   | AT3G02830.1      | 44 kDa  | 8.06%  | 0      | 0      | 0      | 0      | 0      | 0      | 0      | 0      | 0 | 0 | 0 | 0 | 0 | 0 | 0 | 0     |
| Symbols:   Ribosomal protein L35Ae family protein   chr1:15651585-15652427 REVERSE LENGTH=111                                                                     | AT1G41880.1      | 13 kDa  | 0      | 0      | 0      | 33.30% | 0      | 22.50% | 0      | 0      | 0      | 0 | 0 | 0 | 0 | 0 | 0 | 0 | 0     |
| Symbols:   SPA3   SPA1-related 3   chr3:5169327-5172480 REVERSE LENGTH=837                                                                                        | AT3G15354.1      | 93 kDa  | 2.03%  | 3.70%  | 0      | 0      | 0      | 0      | 0      | 0      | 0      | 0 | 0 | 0 | 0 | 0 | 0 | 0 | 0     |
| Symbols:   PRP39   Tetraatricopeptide repeat (TPR)-like superfamily protein   chr1:1051803-1056550 FORWARD LENGTH=768                                             | AT1G04080.1 (+1) | 85 kDa  | 4.95%  | 0      | 0      | 0      | 0      | 0      | 0      | 0      | 0      | 0 | 0 | 0 | 0 | 0 | 0 | 0 | 0     |
| Symbols:   ABA1, LOS6, NPQ2, ATABA1, ZEP, IBS3, ATZEP   zeaxanthin epoxidase (ZEP) (ABA1)   chr5:26753745-26757090 REVERSE LENGTH=667                             | AT5G67030.1 (+1) | 74 kDa  | 4.65%  | 0      | 0      | 0      | 0      | 0      | 0      | 0      | 0      | 0 | 0 | 0 | 0 | 0 | 0 | 0 | 0     |

#### Exclusive Unique Peptide Count

Identified Proteins (283)

|                            | Accession Number | Molecular Weight | ATELF3-1 | ATELF3-2 | SvELF3#2 rep1 | SvELF3#2 rep2 | SvELF3#3 rep1 | SvELF3#3 rep2 | BdELF3#2 rep1 | BdELF3#2 rep2 | BdELF3#3 rep1 | BdELF3#3 rep2 |
|----------------------------|------------------|------------------|----------|----------|---------------|---------------|---------------|---------------|---------------|---------------|---------------|---------------|
| Symbols:   PHYB, HY3, OOP1 |                  |                  |          |          |               |               |               |               |               |               |               |               |



|                                                                                                                                                                  |                  |         |   |   |   |   |   |   |   |   |   |   |
|------------------------------------------------------------------------------------------------------------------------------------------------------------------|------------------|---------|---|---|---|---|---|---|---|---|---|---|
| Symbols: CA1   carbonic anhydrase 1   chr3:194853-197873 REVERSE LENGTH=347                                                                                      | AT3G01500.2 (+1) | 37 kDa  | 1 | 1 | 0 | 1 | 0 | 1 | 2 | 1 | 0 | 0 |
| Symbols: CA2, CA18, BETA CA2   carbonic anhydrase 2   chr5:4758257-4762382 FORWARD LENGTH=331                                                                    | AT5G14740.1 (+1) | 37 kDa  | 0 | 0 | 0 | 0 | 0 | 0 | 2 | 0 | 0 | 0 |
| Symbols: ATAN11, LWD1   Transducin/WD40 repeat-like superfamily protein   chr1:4395114-4396154 REVERSE LENGTH=346                                                | AT1G12910.1      | 39 kDa  | 2 | 2 | 2 | 4 | 1 | 2 | 2 | 2 | 0 | 0 |
| Symbols: MLK4   Protein kinase family protein   chr3:4469434-4472334 FORWARD LENGTH=703                                                                          | AT3G13670.1      | 79 kDa  | 3 | 3 | 0 | 0 | 1 | 6 | 3 | 3 | 5 |   |
| Symbols: RPS6, RPS6A   ribosomal protein 56   chr4:15346306-15347714 REVERSE LENGTH=250                                                                          | AT4G1700.1       | 28 kDa  | 2 | 4 | 0 | 1 | 0 | 4 | 4 | 2 | 1 |   |
| Symbols:   Ribosomal protein L30/L7 family protein   chr2:132943-134264 REVERSE LENGTH=242                                                                       | AT2G01250.1      | 28 kDa  | 3 | 2 | 0 | 0 | 0 | 1 | 1 | 1 | 1 |   |
| Symbols:   Ribosomal protein L30/L7 family protein   chr2:18249227-18250417 REVERSE LENGTH=247                                                                   | AT2G44120.2      | 29 kDa  | 1 | 1 | 0 | 1 | 0 | 1 | 1 | 0 | 0 |   |
| Symbols:   Ribosomal protein L30/L7 family protein   chr3:4433809-4435109 FORWARD LENGTH=244                                                                     | AT3G13580.1 (+2) | 28 kDa  | 1 | 1 | 0 | 0 | 0 | 0 | 1 | 0 | 0 |   |
| Symbols:   Coatomer, alpha subunit   chr2:9152428-9156577 FORWARD LENGTH=1218                                                                                    | AT2G21390.1      | 136 kDa | 2 | 0 | 0 | 2 | 0 | 5 | 0 | 0 | 0 |   |
| Symbols:   Coatomer, alpha subunit   chr1:22919814-22923728 FORWARD LENGTH=1216                                                                                  | AT1G62020.1      | 137 kDa | 2 | 1 | 0 | 0 | 0 | 0 | 1 | 0 | 0 |   |
| Symbols: CAB3, AB180, LHCB1.2   chlorophyll A/B binding protein 3   chr1:10472443-10473246 REVERSE LENGTH=267                                                    | AT1G29910.1 (+1) | 28 kDa  | 0 | 0 | 0 | 0 | 0 | 0 | 0 | 0 | 0 |   |
| Symbols: LHCB2.2, LHCB2   photosystem II light harvesting complex gene 2.2   chr2:1799436-1800329 REVERSE LENGTH=265                                             | AT2G05070.1 (+2) | 29 kDa  | 0 | 0 | 1 | 0 | 0 | 0 | 0 | 0 | 0 |   |
| Symbols: CAB1, AB140, CAB140, LHCB1.3   chlorophyll A/B binding protein 1   chr1:10478071-10478874 FORWARD LENGTH=267                                            | AT1G29930.1      | 28 kDa  | 0 | 0 | 0 | 0 | 0 | 0 | 0 | 0 | 0 |   |
| Symbols: HSP60-2   heat shock protein 60-2   chr2:14075093-14078568 REVERSE LENGTH=585                                                                           | AT2G33210.1 (+1) | 62 kDa  | 1 | 1 | 1 | 1 | 1 | 1 | 0 | 1 | 0 |   |
| Symbols: HSP60, HSP60-3B   heat shock protein 60   chr3:8669013-8672278 FORWARD LENGTH=577                                                                       | AT3G23990.1      | 61 kDa  | 1 | 1 | 0 | 1 | 0 | 2 | 1 | 1 | 0 |   |
| Symbols:   Ribosomal protein S3Ae   chr3:1329751-1331418 FORWARD LENGTH=262                                                                                      | AT3G04840.1      | 30 kDa  | 1 | 1 | 0 | 0 | 0 | 1 | 1 | 1 | 0 |   |
| Symbols:   Ribosomal protein S3Ae   chr4:16548724-16550222 FORWARD LENGTH=262                                                                                    | AT4G34670.1      | 30 kDa  | 1 | 1 | 0 | 1 | 0 | 1 | 1 | 0 | 0 |   |
| Symbols: UBP12   ubiquitin-specific protease 12   chr5:2019545-2027834 REVERSE LENGTH=1116                                                                       | AT5G06600.1 (+1) | 131 kDa | 0 | 0 | 0 | 1 | 0 | 1 | 0 | 1 | 0 |   |
| Symbols: UBP13   ubiquitin-specific protease 13   chr3:3761758-3770290 REVERSE LENGTH=1115                                                                       | AT3G11910.1 (+1) | 131 kDa | 0 | 0 | 0 | 1 | 1 | 0 | 0 | 0 | 0 |   |
| Symbols: NIT1, ATNIT1, NIT1   nitrilase 1   chr3:15986901-15988841 FORWARD LENGTH=346                                                                            | AT3G44310.1 (+1) | 38 kDa  | 2 | 1 | 0 | 4 | 1 | 4 | 1 | 1 | 1 |   |
| Symbols: ARP1, emb2207, RPL3A, RP1   ribosomal protein 1   chr1:16266992-16268631 FORWARD LENGTH=389                                                             | AT1G43170.1 (+7) | 45 kDa  | 2 | 1 | 0 | 2 | 1 | 1 | 1 | 1 | 0 |   |
| Symbols: RD21, RD21A   Granulin repeat cysteine protease family protein   chr1:17283139-17285609 REVERSE LENGTH=462                                              | AT1G47128.1      | 51 kDa  | 4 | 3 | 0 | 2 | 0 | 2 | 0 | 2 | 0 |   |
| Symbols: ATPB, PB   ATP synthase subunit beta   chrC:52660-54156 REVERSE LENGTH=498                                                                              | ATCG00480.1      | 54 kDa  | 4 | 5 | 0 | 2 | 0 | 2 | 2 | 2 | 1 |   |
| Symbols: PPK10, PPK11, BGLU23, LEB   Glycosyl hydrolase superfamily protein   chr3:2840657-2843730 REVERSE LENGTH=524                                            | AT3G09260.1      | ?       | 1 | 1 | 1 | 3 | 0 | 3 | 1 | 1 | 0 |   |
| Symbols: KAS1, KAS1   3-ketoacyl-acyl carrier protein synthase 1   chr5:18774439-18776629 REVERSE LENGTH=473                                                     | AT5G46290.1      | 50 kDa  | 4 | 3 | 0 | 1 | 2 | 3 | 2 | 2 | 0 |   |
| Symbols: RPL2.1   ribosomal protein L2   chrC:84337-85843 REVERSE LENGTH=274                                                                                     | ATCG00830.1 (+1) | 30 kDa  | 3 | 2 | 0 | 2 | 0 | 3 | 3 | 1 | 1 |   |
| Symbols: ASN2   asparagine synthetase 2   chr5:25969224-25972278 FORWARD LENGTH=578                                                                              | AT5G65010.1 (+1) | 65 kDa  | 2 | 1 | 0 | 1 | 0 | 3 | 1 | 1 | 0 |   |
| Symbols: ASN1, DIN6, AT-ASN1   glutamine dependent asparagine synthase 1   chr3:17438445-17441043 REVERSE LENGTH=512                                             | AT3G47340.2      | 58 kDa  | 0 | 0 | 0 | 0 | 0 | 0 | 0 | 0 | 0 |   |
| Symbols: ASN3   asparagine synthetase 3   chr5:3212934-3216418 REVERSE LENGTH=578                                                                                | AT5G10240.1 (+1) | 65 kDa  | 0 | 0 | 0 | 0 | 0 | 0 | 0 | 0 | 0 |   |
| Symbols: PIP2A, PIP2, PIP2.1   plasma membrane intrinsic protein 2A   chr3:19803906-19805454 REVERSE LENGTH=287                                                  | AT3G53420.1 (+1) | 30 kDa  | 4 | 4 | 0 | 1 | 0 | 2 | 1 | 2 | 1 |   |
| Symbols:   Ribosomal protein S10p/S20e family protein   chr3:16471606-16472312 REVERSE LENGTH=124                                                                | AT3G45030.1 (+2) | 14 kDa  | 1 | 0 | 0 | 0 | 0 | 1 | 0 | 0 | 0 |   |
| Symbols:   Ribosomal protein S10p/S20e family protein   chr3:17453671-17454437 REVERSE LENGTH=122                                                                | AT3G47370.1 (+2) | 14 kDa  | 0 | 0 | 0 | 0 | 0 | 0 | 0 | 0 | 0 |   |
| Symbols:   Coatomer, beta subunit   chr4:15269460-15272693 FORWARD LENGTH=948                                                                                    | AT4G31490.1      | 106 kDa | 0 | 0 | 0 | 0 | 0 | 0 | 0 | 0 | 0 |   |
| Symbols:   Coatomer, beta subunit   chr4:15264145-15267384 FORWARD LENGTH=948                                                                                    | AT4G31480.1 (+1) | 106 kDa | 0 | 0 | 0 | 0 | 0 | 0 | 0 | 0 | 0 |   |
| Symbols: MLK3   Protein kinase family protein   chr2:10985118-10988652 REVERSE LENGTH=673                                                                        | AT2G25760.1      | 76 kDa  | 1 | 1 | 0 | 1 | 1 | 3 | 2 | 2 | 2 |   |
| Symbols: RPT3   regulatory particle triple-A ATPase 3   chr5:23569155-23571116 FORWARD LENGTH=408                                                                | AT5G58290.1      | 46 kDa  | 2 | 2 | 1 | 1 | 1 | 2 | 0 | 0 | 0 |   |
| Symbols: CPN60B, LEN1   chaperonin 60 beta   chr1:20715717-20718673 REVERSE LENGTH=600                                                                           | AT1G55490.1 (+1) | 64 kDa  | 1 | 2 | 0 | 0 | 1 | 1 | 1 | 0 | 0 |   |
| Symbols:   TCP-1/cpn60 chaperonin family protein   chr5:22874058-22876966 FORWARD LENGTH=597                                                                     | AT5G56500.1 (+1) | 63 kDa  | 0 | 0 | 0 | 0 | 0 | 0 | 0 | 0 | 0 |   |
| Symbols: ATARCA, RACK1A_AT, RACK1A   Transducin/WD40 repeat-like superfamily protein   chr1:6222325-6223901 FORWARD LENGTH=327                                   | AT1G18080.1      | 36 kDa  | 0 | 1 | 0 | 2 | 0 | 2 | 1 | 0 | 0 |   |
| Symbols: RACK1B_AT   receptor for activated C kinase 1B   chr1:17981977-17983268 REVERSE LENGTH=326                                                              | AT1G48630.1      | 36 kDa  | 1 | 0 | 0 | 0 | 0 | 0 | 1 | 0 | 0 |   |
| Symbols: RACK1C_AT   receptor for activated C kinase 1C   chr3:6211109-6212371 REVERSE LENGTH=326                                                                | AT3G18130.1      | 36 kDa  | 0 | 0 | 0 | 0 | 0 | 0 | 0 | 0 | 0 |   |
| Symbols: AHA2, PMA2, HA2   H(+)-ATPase 2   chr4:14770820-14775920 REVERSE LENGTH=948                                                                             | AT4G0190.1 (+1)  | 104 kDa | 0 | 1 | 0 | 0 | 0 | 0 | 0 | 0 | 0 |   |
| Symbols: AHA1, PMA, OST2, HA1   H(+)-ATPase 1   chr2:8221858-8227268 FORWARD LENGTH=949                                                                          | AT2G18960.1      | 104 kDa | 0 | 0 | 0 | 0 | 0 | 0 | 0 | 0 | 0 |   |
| Symbols: AHA7, HA7   H(+)-ATPase 7   chr3:22298763-22303509 FORWARD LENGTH=961                                                                                   | AT3G60330.1 (+1) | 106 kDa | 0 | 0 | 0 | 0 | 0 | 0 | 0 | 0 | 0 |   |
| Symbols: AHA4, HA4   H(+)-ATPase 4   chr3:17693015-17697801 FORWARD LENGTH=960                                                                                   | AT3G47950.1      | 106 kDa | 0 | 0 | 0 | 0 | 0 | 0 | 0 | 0 | 0 |   |
| Symbols: AHA3, ATAH3, HA3   H(+)-ATPase 3   chr5:23231208-23236381 REVERSE LENGTH=949                                                                            | AT5G57350.1 (+1) | 104 kDa | 0 | 0 | 0 | 0 | 0 | 0 | 0 | 0 | 0 |   |
| Symbols: AHA10   autoinhibited H(+)-ATPase isoform 10   chr1:5904058-5908898 FORWARD LENGTH=947                                                                  | AT1G17260.1      | 105 kDa | 0 | 0 | 0 | 0 | 0 | 0 | 0 | 0 | 0 |   |
| Symbols:   ATPase, F1 complex, alpha subunit protein   chr2:3361474-3364028 FORWARD LENGTH=777                                                                   | AT2G07698.1      | 86 kDa  | 2 | 2 | 1 | 3 | 1 | 4 | 1 | 0 | 0 |   |
| Symbols: LWD2   Transducin/WD40 repeat-like superfamily protein   chr3:9793276-9794316 FORWARD LENGTH=346                                                        | AT3G26640.1      | 39 kDa  | 2 | 1 | 0 | 1 | 0 | 2 | 1 | 0 | 0 |   |
| Symbols:   ATPase, V1 complex, subunit B protein   chr1:7016971-7020290 FORWARD LENGTH=487                                                                       | AT1G20260.1 (+2) | 54 kDa  | 1 | 3 | 0 | 2 | 0 | 3 | 2 | 2 | 0 |   |
| Symbols: ATGSTF8, ATGSTF5, GST6, GSTF8   glutathione S-transferase phi 8   chr2:19558213-19559266 FORWARD LENGTH=263                                             | AT2G47730.1      | 29 kDa  | 3 | 2 | 0 | 0 | 0 | 4 | 0 | 0 | 0 |   |
| Symbols: ATPC1   ATPase, F1 complex, gamma subunit protein   chr4:2350761-2351882 REVERSE LENGTH=373                                                             | AT4G04640.1      | 41 kDa  | 1 | 5 | 0 | 2 | 1 | 2 | 1 | 2 | 1 |   |
| Symbols: FBA2   fructose-bisphosphate aldolase 2   chr4:18163714-18165659 REVERSE LENGTH=398                                                                     | AT4G38970.1      | 43 kDa  | 2 | 2 | 0 | 3 | 1 | 3 | 2 | 1 | 0 |   |
| Symbols: RPL16A   ribosomal protein large subunit 16A   chr2:17791794-17792946 FORWARD LENGTH=182                                                                | AT2G42740.1 (+4) | 21 kDa  | 1 | 2 | 2 | 1 | 1 | 2 | 1 | 2 | 1 |   |
| Symbols:   Transketolase   chr3:22454004-22456824 FORWARD LENGTH=741                                                                                             | AT3G60750.1 (+1) | 80 kDa  | 3 | 2 | 0 | 0 | 0 | 7 | 1 | 0 | 0 |   |
| Symbols:   binding   chr5:19317899-19327014 FORWARD LENGTH=1606                                                                                                  | AT5G47690.2 (+1) | 181 kDa | 6 | 0 | 0 | 2 | 0 | 6 | 0 | 0 | 0 |   |
| Symbols: SAC52, RPL10, RPL10A   Ribosomal protein L16p/L10e family protein   chr1:4888270-4889408 FORWARD LENGTH=220                                             | AT1G14320.1      | 25 kDa  | 1 | 2 | 1 | 1 | 0 | 1 | 2 | 2 | 1 |   |
| Symbols: CAC3   acetyl Co-enzyme a carboxylase carboxyltransferase alpha subunit   chr2:15917612-15920749 FORWARD LENGTH=769                                     | AT2G38040.1 (+1) | 85 kDa  | 0 | 3 | 1 | 0 | 0 | 4 | 0 | 0 | 0 |   |
| Symbols: RAN-1, RAN1, ATRAN1   RAS-related nuclear protein-1   chr5:6760364-6761747 FORWARD LENGTH=221                                                           | AT5G20010.1 (+2) | 25 kDa  | 2 | 3 | 0 | 2 | 0 | 5 | 1 | 0 | 0 |   |
| Symbols:   Ribosomal protein S4   chr5:4935124-4936334 REVERSE LENGTH=198                                                                                        | AT5G15200.1      | 23 kDa  | 2 | 2 | 1 | 2 | 1 | 2 | 1 | 0 | 0 |   |
| Symbols:   Ribosomal protein S26e family protein   chr2:16918506-16919623 FORWARD LENGTH=133                                                                     | AT2G40510.1 (+2) | 15 kDa  | 2 | 2 | 0 | 2 | 0 | 2 | 2 | 2 | 1 |   |
| Symbols: EMB2296   Ribosomal protein L2 family   chr2:7837151-7838160 FORWARD LENGTH=258                                                                         | AT2G18020.1      | 28 kDa  | 1 | 1 | 1 | 0 | 0 | 1 | 1 | 1 | 0 |   |
| Symbols:   Ribosomal protein L2 family   chr4:17097613-17098656 FORWARD LENGTH=258                                                                               | AT4G36130.1      | 28 kDa  | 1 | 1 | 0 | 0 | 0 | 0 | 1 | 0 | 0 |   |
| Symbols:   Histone superfamily protein   chr1:2369212-2369523 FORWARD LENGTH=103                                                                                 | AT1G07660.1 (+8) | 11 kDa  | 1 | 1 | 1 | 3 | 1 | 3 | 1 | 1 | 1 |   |
| Symbols:   oxidoreductases, acting on the aldehyde or oxo group of donors, NAD or NADP as acceptor; copper ion binding   chr2:8613168-8615649 FORWARD LENGTH=401 | AT2G19940.1 (+1) | 44 kDa  | 5 | 1 | 0 | 0 | 0 | 3 | 1 | 0 | 0 |   |
| Symbols: ATPR55B, RPS5B   ribosomal protein 5B   chr2:15647883-15649042 REVERSE LENGTH=207                                                                       | AT2G37270.1 (+3) | 23 kDa  | 0 | 0 | 0 | 0 | 0 | 2 | 2 | 2 | 1 |   |
| Symbols:   Thioredoxin superfamily protein   chr3:3672189-3673937 FORWARD LENGTH=266                                                                             | AT3G11630.1      | 29 kDa  | 0 | 1 | 0 | 0 | 0 | 2 | 1 | 2 | 0 |   |
| Symbols: PIP1B, TMP-A, ATHH2, PIP1.2   plasma membrane intrinsic protein 1B   chr2:18910450-18911703 FORWARD LENGTH=286                                          | AT2G45960.1 (+2) | 31 kDa  | 1 | 1 | 0 | 2 | 1 | 2 | 1 | 2 | 0 |   |
| Symbols: RPL27A, RPL27AB   Ribosomal protein L18e/L15 superfamily protein   chr1:8263007-8263447 FORWARD LENGTH=146                                              | AT1G23290.1 (+1) | 16 kDa  | 1 | 1 | 0 | 1 | 0 | 1 | 2 | 1 | 1 |   |
| Symbols:   Ribosomal protein L18ae/LX family protein   chr2:14532916-14534161 REVERSE LENGTH=178                                                                 | AT2G34480.1      | 21 kDa  | 1 | 0 | 0 | 0 | 0 | 0 | 0 | 0 | 0 |   |
| Symbols:   Ribosomal protein L18ae/LX family protein   chr3:4910773-4911933 FORWARD LENGTH=178                                                                   | AT3G14600.1      | 21 kDa  | 0 | 0 | 0 | 0 | 0 | 0 | 0 | 0 | 0 |   |
| Symbols: EMB2719, HAP15   PAM domain (PCI/PINT associated module) protein   chr1:7001409-7004154 REVERSE LENGTH=488                                              | AT1G20200.1      | 56 kDa  | 0 | 1 | 0 | 0 | 0 | 0 | 0 | 0 | 0 |   |
| Symbols:   PAM domain (PCI/PINT associated module) protein   chr1:28524623-28526718 REVERSE LENGTH=487                                                           | AT1G75980.1      | 56 kDa  | 0 | 0 | 0 | 0 | 0 | 0 | 0 | 0 | 0 |   |
| Symbols: APS1   ATP sulfurylase 1   chr3:8112837-8114734 FORWARD LENGTH=463                                                                                      | AT3G22800.1      | 51 kDa  | 2 | 0 | 0 | 2 | 0 | 2 | 0 | 0 | 0 |   |
| Symbols: APS2, ASA1   Pseudouridine synthase/archaeosine transglycosylase-like family protein   chr1:6914835-6916657 REVERSE LENGTH=476                          | AT1G19920.1      | 54 kDa  | 0 | 0 | 0 | 0 | 0 | 0 | 0 | 0 | 0 |   |
| Symbols: APS3   Pseudouridine synthase/archaeosine transglycosylase-like family protein   chr4:8413443-8415311 REVERSE LENGTH=465                                | AT4G14680.1      | 52 kDa  | 0 | 0 | 0 | 0 | 0 | 0 | 0 | 0 | 0 |   |
| Symbols:   Tetratricopeptide repeat (TPR)-like superfamily protein   chr3:22565440-22566678 REVERSE LENGTH=412                                                   | AT3G60980.1      | 47 kDa  | 0 | 0 | 0 | 0 | 0 | 5 | 5 | 0 | 0 |   |
| Symbols: SPA2   SPA1-related 2   chr4:6772163-6776675 FORWARD LENGTH=1036                                                                                        | AT4G11110.1      | 115 kDa | 5 | 6 | 0 | 0 | 0 | 0 | 0 | 0 | 0 |   |
| Symbols: PORB   protochlorophyllide oxidoreductase B   chr4:13725648-13727107 FORWARD LENGTH=401                                                                 | AT4G27440.1 (+1) | 43 kDa  | 3 | 2 | 0 | 1 | 0 | 1 | 1 | 0 | 0 |   |
| Symbols: ATPF   ATP synthase epsilon chain   chrC:52265-52663 REVERSE LENGTH=132                                                                                 | ATCG00470.1      | 14 kDa  | 2 | 2 | 0 | 1 | 0 | 1 | 1 | 2 | 0 |   |
| Symbols: RPL14   ribosomal protein L14   chrC:80696-81064 REVERSE LENGTH=122                                                                                     | ATCG00780.1      | 14 kDa  | 2 | 2 | 0 | 1 | 0 | 2 | 1 | 2 | 0 |   |
| Symbols:   C2 calcium/lipid-binding plant phosphoribosyltransferase family protein   chr5:2127200-2129584 REVERSE LENGTH=794                                     | AT5G06850.1      | 91      |   |   |   |   |   |   |   |   |   |   |

|                                                                                                                                                                   |                  |         |   |   |   |   |   |   |   |   |   |   |
|-------------------------------------------------------------------------------------------------------------------------------------------------------------------|------------------|---------|---|---|---|---|---|---|---|---|---|---|
| Symbols: STV1, RPL24B, RPL24   Ribosomal protein L24e family protein   chr3:19660749-19661912 REVERSE LENGTH=163                                                  | AT3G53020.1      | 19 kDa  | 2 | 2 | 0 | 1 | 0 | 1 | 2 | 2 | 0 | 0 |
| Symbols:   glycine-rich protein   chr4:11944050-11945565 REVERSE LENGTH=356                                                                                       | AT4G2740.1 (+1)  | 39 kDa  | 2 | 2 | 0 | 0 | 0 | 2 | 1 | 0 | 0 | 0 |
| Symbols:   Ribosomal L28e protein family   chr2:8511752-8512995 FORWARD LENGTH=143                                                                                | AT2G19730.1 (+2) | 16 kDa  | 1 | 1 | 0 | 0 | 0 | 0 | 0 | 2 | 0 | 0 |
| Symbols:   Ribosomal protein S11 family protein   chr2:15169925-15171159 FORWARD LENGTH=150                                                                       | AT2G36160.1      | 16 kDa  | 1 | 1 | 0 | 1 | 0 | 0 | 0 | 0 | 0 | 0 |
| Symbols:   Ribosomal protein S11 family protein   chr3:3623757-3624866 REVERSE LENGTH=150                                                                         | AT3G11510.1      | 16 kDa  | 0 | 1 | 0 | 0 | 0 | 0 | 0 | 0 | 0 | 0 |
| Symbols:   Coatomer, beta' subunit   chr3:5411699-5418133 REVERSE LENGTH=909                                                                                      | AT3G15980.1 (+3) | 102 kDa | 1 | 1 | 0 | 0 | 0 | 0 | 0 | 0 | 0 | 0 |
| Symbols:   structural molecules   chr1:30084522-30091949 FORWARD LENGTH=1135                                                                                      | AT1G79990.1 (+2) | 129 kDa | 0 | 0 | 0 | 0 | 0 | 0 | 0 | 0 | 0 | 0 |
| Symbols: XIX, ATXK, XI-17   Myosin family protein with Dil domain   chr5:6927064-6936825 REVERSE LENGTH=1545                                                      | AT5G20490.1 (+1) | 175 kDa | 1 | 1 | 0 | 0 | 0 | 0 | 0 | 0 | 0 | 0 |
| Symbols: MYA1, ATMVA1, XI-1   myosin I   chr1:6039453-6049309 FORWARD LENGTH=1520                                                                                 | AT1G17580.1      | 173 kDa | 1 | 0 | 0 | 0 | 0 | 0 | 0 | 0 | 0 | 0 |
| Symbols: XIX, ATXK   Myosin family protein with Dil domain   chr1:2779963-2788325 FORWARD LENGTH=1538                                                             | AT1G08730.1      | 175 kDa | 0 | 0 | 0 | 0 | 0 | 0 | 0 | 0 | 0 | 0 |
| Symbols: HSP81-2, ERD8, HSP90-2, ATHsp90.2   heat shock protein 81-2   chr5:22686923-22689433 FORWARD LENGTH=699                                                  | AT5G56030.1 (+1) | 80 kDa  | 1 | 3 | 2 | 0 | 1 | 0 | 1 | 0 | 0 | 0 |
| Symbols: PIP3, PIP3A, PIP2-7, SIMIP   plasma membrane intrinsic protein 3   chr4:16708672-16709958 FORWARD LENGTH=280                                             | AT4G35100.1 (+1) | 30 kDa  | 2 | 2 | 1 | 1 | 1 | 1 | 0 | 1 | 0 | 0 |
| Symbols: RPS4   chloroplast ribosomal protein S4   chrC:45223-45828 REVERSE LENGTH=201                                                                            | ATCG0380.1       | 23 kDa  | 1 | 2 | 0 | 0 | 0 | 0 | 2 | 2 | 0 | 0 |
| Symbols: LOS2, ENO2   Enolase   chr2:15321081-15323786 REVERSE LENGTH=444                                                                                         | AT2G36530.1      | 48 kDa  | 1 | 1 | 1 | 0 | 1 | 0 | 2 | 1 | 0 | 1 |
| Symbols:   ATPase, V0/A0 complex, subunit C/D   chr3:10778025-10780350 FORWARD LENGTH=351                                                                         | AT3G28715.1      | 41 kDa  | 2 | 1 | 0 | 0 | 0 | 0 | 1 | 0 | 0 | 0 |
| Symbols:   ATPase, V0/A0 complex, subunit C/D   chr3:10773144-10775594 REVERSE LENGTH=351                                                                         | AT3G28710.1      | 41 kDa  | 1 | 1 | 0 | 1 | 0 | 0 | 1 | 0 | 0 | 0 |
| Symbols: cpHsc70-1   chloroplast heat shock protein 70-1   chr4:12590094-12593437 FORWARD LENGTH=718                                                              | AT4G24280.1      | 77 kDa  | 0 | 0 | 0 | 0 | 0 | 1 | 0 | 0 | 0 | 0 |
| Symbols: CPHSC70-2EAT SHOCK PROTEIN 70-2, HSC70-7, cpHsc70-2   chloroplast heat shock protein 70-2   chr5:20303470-20306295 FORWARD LENGTH=718                    | AT5G49910.1      | 77 kDa  | 0 | 0 | 0 | 0 | 1 | 0 | 0 | 0 | 0 | 0 |
| Symbols: LUH   LEUNIG_homolog   chr2:13867235-13871844 FORWARD LENGTH=787                                                                                         | AT2G2700.1 (+6)  | 86 kDa  | 0 | 0 | 0 | 0 | 0 | 3 | 0 | 0 | 0 | 0 |
| Symbols: emb1138   DEAD box RNA helicase (RH3)   chr5:9285540-9288871 REVERSE LENGTH=747                                                                          | AT5G26742.1 (+1) | 81 kDa  | 0 | 3 | 2 | 0 | 1 | 0 | 0 | 0 | 0 | 0 |
| Symbols: RPS11   ribosomal protein S11   chrC:78960-79376 REVERSE LENGTH=138                                                                                      | ATCG00750.1      | 15 kDa  | 2 | 2 | 0 | 0 | 0 | 1 | 2 | 2 | 0 | 0 |
| Symbols:   Ribosomal protein S4 (RPS4A) family protein   chr2:7546598-7548138 FORWARD LENGTH=261                                                                  | AT2G17360.1 (+3) | 30 kDa  | 2 | 0 | 1 | 1 | 1 | 1 | 1 | 0 | 0 | 0 |
| Symbols: PFL, RPS18A, PFL1   Ribosomal protein S13/S18 family   chr1:8067990-8069163 FORWARD LENGTH=152                                                           | AT1G2780.1 (+2)  | 18 kDa  | 0 | 0 | 1 | 1 | 2 | 0 | 0 | 1 | 1 | 0 |
| Symbols: P40, AP40, RP40, RPSA   40s ribosomal protein SA   chr1:27243148-27244842 REVERSE LENGTH=298                                                             | AT1G72370.1 (+1) | 32 kDa  | 1 | 2 | 0 | 1 | 0 | 0 | 1 | 0 | 0 | 0 |
| Symbols: RPS4B   40s ribosomal protein SA B   chr1:1209544-1310846 REVERSE LENGTH=280                                                                             | AT3G04770.2      | 31 kDa  | 0 | 0 | 0 | 0 | 0 | 0 | 0 | 0 | 0 | 0 |
| Symbols: CLPC, ATHSP93.V, HSP93.V, DCA1, CLPC1   CLPC homologue 1   chr5:20715710-20719800 REVERSE LENGTH=929                                                     | AT5G50920.1      | ?       | 1 | 0 | 0 | 0 | 0 | 0 | 0 | 0 | 0 | 0 |
| Symbols: ATCLPC, ATHSP93.III, HSP93.III   Clp ATPase   chr3:18122363-18126008 REVERSE LENGTH=952                                                                  | AT3G48870.1 (+1) | 106 kDa | 0 | 0 | 0 | 0 | 0 | 0 | 0 | 0 | 0 | 0 |
| Symbols: SPA4   SPA1-related 4   chr1:19783748-19786690 FORWARD LENGTH=794                                                                                        | AT1G53090.1 (+1) | 89 kDa  | 2 | 5 | 0 | 0 | 0 | 0 | 0 | 0 | 0 | 0 |
| Symbols:   AAA-type ATPase family protein   chr2:8692736-8694837 FORWARD LENGTH=443                                                                               | AT2G20140.1 (+1) | 49 kDa  | 5 | 3 | 0 | 0 | 0 | 0 | 1 | 0 | 0 | 0 |
| Symbols: RPT6A, ATSLG1   regulatory particle triple-A ATPase 6A   chr5:6752144-6754918 FORWARD LENGTH=419                                                         | AT5G19990.1 (+1) | 47 kDa  | 0 | 0 | 0 | 1 | 0 | 0 | 2 | 0 | 0 | 0 |
| Symbols:   Lactate/malate dehydrogenase family protein   chr1:1189418-1191267 REVERSE LENGTH=332                                                                  | AT1G04410.1      | 36 kDa  | 0 | 2 | 0 | 0 | 0 | 1 | 0 | 0 | 0 | 0 |
| Symbols:   Aldolase superfamily protein   chr3:19627383-19628874 REVERSE LENGTH=358                                                                               | AT3G52930.1      | 39 kDa  | 0 | 1 | 0 | 0 | 0 | 0 | 0 | 1 | 0 | 0 |
| Symbols:   Aldolase superfamily protein   chr5:963389-964982 REVERSE LENGTH=359                                                                                   | AT5G03690.2      | 39 kDa  | 0 | 0 | 0 | 0 | 0 | 0 | 0 | 0 | 0 | 0 |
| Symbols:   Aldolase superfamily protein   chr4:13391566-13392937 FORWARD LENGTH=358                                                                               | AT4G26530.1 (+1) | 38 kDa  | 0 | 0 | 0 | 0 | 0 | 0 | 0 | 0 | 0 | 0 |
| Symbols: CHL11, CH12, CH-42, CHL11, CHL1-1   P-loop containing nucleoside triphosphate hydrolases superfamily protein   chr4:10201897-10203361 REVERSE LENGTH=424 | AT4G18480.1      | 46 kDa  | 1 | 0 | 0 | 0 | 0 | 1 | 0 | 0 | 0 | 0 |
| Symbols: CHL2, CHL12, CHL1-2   magnesium chelatase 12   chr5:18628095-18629565 FORWARD LENGTH=418                                                                 | AT5G45930.1      | 46 kDa  | 0 | 0 | 0 | 0 | 0 | 0 | 0 | 0 | 0 | 0 |
| Symbols:   transducin family protein / WD-40 repeat family protein   chr3:23431009-23437241 REVERSE LENGTH=1104                                                   | AT3G63460.1 (+2) | 120 kDa | 1 | 1 | 0 | 0 | 1 | 0 | 2 | 0 | 0 | 0 |
| Symbols:   vacuolar ATP synthase subunit H family protein   chr3:14228846-14232228 REVERSE LENGTH=441                                                             | AT3G42050.1      | 50 kDa  | 2 | 1 | 0 | 0 | 0 | 0 | 0 | 0 | 0 | 0 |
| Symbols: RPL18   ribosomal protein L18   chr3:16215111-1622775 FORWARD LENGTH=187                                                                                 | AT3G05590.1 (+1) | 21 kDa  | 2 | 2 | 1 | 1 | 0 | 0 | 2 | 1 | 0 | 0 |
| Symbols: RPT5A, ATS6A.2   regulatory particle triple-A ATPase 5A   chr3:1603540-1605993 FORWARD LENGTH=424                                                        | AT3G05530.1      | 47 kDa  | 2 | 1 | 0 | 0 | 0 | 1 | 1 | 1 | 0 | 0 |
| Symbols: AGT, AGT1, SGAT   alanine glyoxylate aminotransferase   chr2:5539417-5540902 REVERSE LENGTH=401                                                          | AT2G13360.1 (+1) | 44 kDa  | 1 | 1 | 1 | 0 | 0 | 0 | 2 | 0 | 0 | 0 |
| Symbols:   Ribosomal protein L22p/L17e family protein   chr1:9515230-9516725 FORWARD LENGTH=176                                                                   | AT1G27400.1 (+1) | 20 kDa  | 0 | 1 | 2 | 0 | 0 | 1 | 2 | 0 | 0 | 0 |
| Symbols: VHA-A   vacuolar ATP synthase subunit A   chr1:29660463-29664575 FORWARD LENGTH=623                                                                      | AT1G78900.1 (+1) | 69 kDa  | 0 | 1 | 0 | 0 | 0 | 0 | 2 | 0 | 0 | 0 |
| Symbols: RPT1A   regulatory particle triple-A 1A   chr1:20065921-20068324 REVERSE LENGTH=426                                                                      | AT1G53750.1      | 48 kDa  | 2 | 1 | 0 | 1 | 0 | 0 | 0 | 0 | 0 | 0 |
| Symbols: ATJ2, J2   DNAJ homologue 2   chr5:7303798-7305668 REVERSE LENGTH=419                                                                                    | AT5G22060.1      | 46 kDa  | 0 | 0 | 0 | 0 | 0 | 0 | 0 | 0 | 0 | 0 |
| Symbols: ATJ3, ATJ   DNAJ homologue 3   chr3:15869115-15871059 REVERSE LENGTH=420                                                                                 | AT3G4110.1 (+1)  | 46 kDa  | 0 | 0 | 0 | 0 | 0 | 0 | 1 | 0 | 0 | 0 |
| Symbols: RPS1, ARRP5   ribosomal protein S1   chr5:11619262-11621223 REVERSE LENGTH=416                                                                           | AT5G30510.1      | 45 kDa  | 0 | 1 | 0 | 0 | 3 | 0 | 4 | 0 | 0 | 0 |
| Symbols: ACCD   acetyl-CoA carboxylase carboxyl transferase subunit beta   chrC:57075-58541 FORWARD LENGTH=488                                                    | ATCG00500.1      | 56 kDa  | 2 | 1 | 0 | 0 | 0 | 0 | 0 | 0 | 0 | 0 |
| Symbols: RPS8   ribosomal protein S8   chrC:80068-80472 REVERSE LENGTH=134                                                                                        | ATCG00770.1      | 15 kDa  | 1 | 2 | 0 | 0 | 1 | 0 | 1 | 1 | 0 | 0 |
| Symbols: SSR16   small subunit ribosomal protein 16   chr4:16535084-16536092 REVERSE LENGTH=113                                                                   | AT4G44620.1      | 13 kDa  | 1 | 1 | 1 | 0 | 1 | 0 | 1 | 1 | 0 | 0 |
| Symbols:   Sucrose-6F-phosphate phosphohydrolase family protein   chr2:15053952-15055776 FORWARD LENGTH=422                                                       | AT2G35840.1 (+2) | 48 kDa  | 1 | 0 | 0 | 0 | 0 | 0 | 2 | 0 | 0 | 0 |
| Symbols:   GTP binding Elongation factor Tu family protein   chr4:1295751-1298354 REVERSE LENGTH=454                                                              | AT4G02930.1      | 49 kDa  | 3 | 0 | 0 | 1 | 0 | 0 | 3 | 0 | 0 | 0 |
| Symbols: ECT2   evolutionarily conserved C-terminal region 2   chr3:4385274-4388220 REVERSE LENGTH=667                                                            | AT3G13460.1 (+3) | 72 kDa  | 0 | 3 | 2 | 0 | 0 | 0 | 0 | 0 | 0 | 0 |
| Symbols:   Glycine cleavage T-protein family   chr1:4001801-4003245 FORWARD LENGTH=408                                                                            | AT1G11860.1 (+2) | 44 kDa  | 1 | 1 | 0 | 1 | 0 | 1 | 2 | 1 | 0 | 0 |
| Symbols: NOP56   homolog of nucleolar protein NOP56   chr1:20984544-20986893 REVERSE LENGTH=522                                                                   | AT1G56110.1      | 59 kDa  | 1 | 0 | 0 | 0 | 0 | 0 | 2 | 0 | 0 | 0 |
| Symbols: RPS15A   ribosomal protein S15A   chr1:2408413-2409065 REVERSE LENGTH=130                                                                                | AT1G07770.1 (+2) | 15 kDa  | 1 | 1 | 1 | 0 | 0 | 1 | 3 | 0 | 0 | 0 |
| Symbols:   Ribosomal protein S8 family protein   chr2:16517588-16518265 REVERSE LENGTH=136                                                                        | AT2G39590.1      | 15 kDa  | 0 | 0 | 0 | 0 | 0 | 0 | 0 | 0 | 0 | 0 |
| Symbols: RPN1A, ATRPN1A   26S proteasome regulatory subunit 52 1A   chr2:8859211-8864699 FORWARD LENGTH=891                                                       | AT2G20580.1      | ?       | 2 | 1 | 0 | 0 | 0 | 0 | 0 | 0 | 0 | 0 |
| Symbols: PAC1   20S proteasome alpha subunit C1   chr3:7792819-7793571 REVERSE LENGTH=250                                                                         | AT3G22110.1      | 27 kDa  | 0 | 2 | 0 | 0 | 0 | 1 | 1 | 1 | 0 | 0 |
| Symbols: ATB8C1, B8C1, RSU2   breast basic conserved 1   chr3:18166971-18168047 REVERSE LENGTH=206                                                                | AT3G49010.1 (+3) | 24 kDa  | 1 | 0 | 0 | 1 | 0 | 0 | 2 | 1 | 0 | 0 |
| Symbols:   Tetratricopeptide repeat (TPR)-like superfamily protein   chr3:22535729-22536940 FORWARD LENGTH=403                                                    | AT3G60960.1      | 46 kDa  | 0 | 0 | 0 | 0 | 0 | 0 | 1 | 2 | 0 | 0 |
| Symbols: CPN60A, CH-CPN60A, SLP   chaperonin-60alpha   chr2:11926603-11929184 FORWARD LENGTH=586                                                                  | AT2G28000.1      | 62 kDa  | 2 | 1 | 0 | 0 | 0 | 0 | 0 | 0 | 0 | 0 |
| Symbols: ATTP149A, RIN1   P-loop containing nucleoside triphosphate hydrolases superfamily protein   chr5:7391026-7394071 REVERSE LENGTH=458                      | AT5G22330.1      | 50 kDa  | 0 | 2 | 0 | 1 | 0 | 0 | 1 | 0 | 0 | 0 |
| Symbols: RPL16   ribosomal protein L16   chrC:81189-82652 REVERSE LENGTH=135                                                                                      | ATCG00790.1      | 15 kDa  | 0 | 0 | 0 | 0 | 0 | 0 | 0 | 0 | 0 | 0 |
| Symbols: PUB12, ATPUB12   PLANT U-BOX 12   chr2:12367001-12370608 REVERSE LENGTH=962                                                                              | AT2G28830.1      | 107 kDa | 0 | 0 | 0 | 0 | 0 | 0 | 0 | 0 | 0 | 0 |
| Symbols:   NAD(P)-binding Rossmann-fold superfamily protein   chr3:11193767-11194948 REVERSE LENGTH=298                                                           | AT3G29250.1      | 32 kDa  | 0 | 0 | 0 | 1 | 0 | 3 | 0 | 0 | 0 | 0 |
| Symbols: ILA   ILITHYIA   chr1:24065232-24081908 REVERSE LENGTH=2610                                                                                              | AT1G64790.1 (+1) | 285 kDa | 3 | 0 | 0 | 0 | 0 | 0 | 0 | 0 | 0 | 0 |
| Symbols: APUM5, PUM5   pumilio 5   chr3:7059098-7062660 REVERSE LENGTH=961                                                                                        | AT3G20250.1      | 107 kDa | 0 | 0 | 0 | 1 | 0 | 0 | 0 | 0 | 0 | 0 |
| Symbols: ATTP57, TP57, ATTPSA   trehalose-phosphatase/synthase 7   chr1:1955413-1958153 FORWARD LENGTH=851                                                        | AT1G06410.1      | 97 kDa  | 1 | 0 | 0 | 0 | 0 | 0 | 3 | 0 | 0 | 0 |
| Symbols:   transcription regulators   chr1:373335-386682 FORWARD LENGTH=2431                                                                                      | AT1G02080.1 (+1) | 270 kDa | 2 | 1 | 0 | 0 | 0 | 0 | 0 | 0 | 0 | 0 |
| Symbols: ATGSTF9, GLUTTR, ATGSTF7, GSTF9   glutathione S-transferase PHI 9   chr2:13139132-13140057 FORWARD LENGTH=215                                            | AT2G30860.1 (+1) | 24 kDa  | 0 | 2 | 0 | 0 | 1 | 0 | 0 | 0 | 0 | 0 |
| Symbols:   Ribosomal protein L35Ae family protein   chr1:27928415-27929466 REVERSE LENGTH=112                                                                     | AT1G74270.1      | 13 kDa  | 1 | 0 | 0 | 0 | 0 | 1 | 0 | 0 | 0 | 0 |
| Symbols: ATU2AF35B, U2AF35B   Zinc finger C-x8-C-x5-C-x3-H type family protein   chr5:17170445-17171296 REVERSE LENGTH=283                                        | AT5G42820.1 (+1) | 33 kDa  | 1 | 0 | 0 | 0 | 0 | 0 | 0 | 0 | 0 | 0 |
| Symbols:   U2 snRNP auxiliary factor small subunit, putative   chr1:9615302-9616042 FORWARD LENGTH=246                                                            | AT1G27650.2      | 29 kDa  | 0 | 0 | 0 | 0 | 0 | 0 | 0 | 0 | 0 | 0 |
| Symbols:   Zinc finger C-x8-C-x5-C-x3-H type family protein   chr3:16328221-16328448 REVERSE LENGTH=75                                                            | AT3G4785.1       | 9 kDa   | 0 | 0 | 0 | 0 | 0 | 0 | 0 | 0 | 0 | 0 |
| Symbols: PIL6, PIF5   phytochrome interacting factor 3-like 6   chr3:21828189-21828995 REVERSE LENGTH=442                                                         | AT3G59060.1 (+3) | 49 kDa  | 0 | 0 | 0 | 0 | 0 | 0 | 1 | 0 | 0 | 0 |
| Symbols: PIF4, SRL2, ADPIF4   phytochrome interacting factor 4   chr2:17887003-17888823 FORWARD LENGTH=430                                                        | AT2G43010.1 (+1) | 48 kDa  | 0 | 0 | 0 | 0 | 0 | 0 | 0 | 0 | 0 | 0 |
| Symbols:   Ribosomal protein L31e family protein   chr2:8513577-8514346 FORWARD LENGTH=119                                                                        | AT2G19740.1 (+2) | 14 kDa  | 0 | 0 | 0 | 1 | 0 | 0 | 1 | 0 | 0 | 0 |
| Symbols:   Ribosomal protein L31e family protein   chr5:22944003-22944767 REVERSE LENGTH=85                                                                       | AT5G56710.2      | 10 kDa  | 0 | 0 | 0 | 0 | 0 | 0 | 0 | 0 | 0 | 0 |
| Symbols:   Coatomer epsilon subunit   chr1:10858546-10860173 REVERSE LENGTH=292                                                                                   | AT1G30630.1      | 33 kDa  | 0 | 0 | 0 | 2 | 0 | 0 | 2 | 0 | 0 | 0 |
| Symbols: SHM4   serine hydroxymethyltransferase 4   chr4:8048013-8050021 REVERSE LENGTH=471                                                                       | AT4G             |         |   |   |   |   |   |   |   |   |   |   |
